# Supplementary material for: A liquid crucible model for aggregation of phenylacetylene in the gas phase
Source: Royal Society of Chemistry journal article supplement (doi:10.1039/c8cp07738j), 2019-01-01
Supplement: c8cp07738j2.pdf [file c8cp07738j2.pdf]

Electronic Supplementary Information – 2 for

---

## Liquid Crucible Model for Aggregation of Phenylacetylene in the Gas Phase

Saurabh Mishra,<sup>a</sup> Dipak Kumar Sahoo,<sup>b</sup> Po-Jen Hsu,<sup>\*c</sup> Yoshiyuki Matsuda,<sup>\*d</sup> Jer-Lai Kuo,<sup>\*c</sup>  
Himansu S. Biswal,<sup>\*b</sup> and G. Naresh Patwari<sup>\*a</sup>

<sup>a</sup> Department of Chemistry, Indian Institute of Technology Bombay, Powai, Mumbai 400 076  
India. E-mail: naresh@chem.iitb.ac.in

<sup>b</sup> Homi Bhabha National Institute, School of Chemical Sciences, National Institute of Science  
Education and Research Bhubaneswar, P.O. Jatni, Khurda 752050, Odisha, India. E-mail:  
himansu@niser.ac.in

<sup>c</sup> Institute of Atomic and Molecular Sciences, Academia Sinica, Taipei 10617, Taiwan. E-mail:  
clusterga@gmail.com; jlkuo@pub.iams.sinica.edu.tw

<sup>d</sup> Department of Chemistry, Graduate School of Science, Tohoku University, 6-3, Aramaki  
Aza-Aoba, Aoba-ku, Sendai 980-8578, Japan. E-mail: matsuda@tohoku.ac.jp

Coordinates of all the structures optimized at B97-D/aug-cc-pVDZ level of theory.

\*\*\*\*\*

### Monomer

\*\*\*\*\*

|   |            |            |            |
|---|------------|------------|------------|
| C | 0.0000000  | 0.0000000  | -2.2564460 |
| C | -1.2168545 | 0.0000000  | -1.5507858 |
| C | 1.2168545  | 0.0000000  | -1.5507858 |
| H | -2.1671949 | 0.0000000  | -2.0952159 |
| H | 2.1671949  | 0.0000000  | -2.0952159 |
| C | -1.2220794 | -0.0000000 | -0.1489895 |
| C | 1.2220794  | -0.0000000 | -0.1489895 |
| H | -2.1669443 | -0.0000000 | 0.4022277  |
| H | 2.1669443  | -0.0000000 | 0.4022277  |
| C | 0.0000000  | -0.0000000 | 0.5706280  |
| H | 0.0000000  | -0.0000000 | -3.3513709 |
| C | 0.0000000  | -0.0000000 | 2.0030243  |
| C | 0.0000000  | 0.0000000  | 3.2270534  |
| H | -0.0000000 | 0.0000000  | 4.3004195  |

\*\*\*\*\*

### Dimers

\*\*\*\*\*

#### Dimer-01 (D1)

|   |            |            |            |
|---|------------|------------|------------|
| C | -2.5443027 | 1.0444820  | 0.8995341  |
| C | -1.8638295 | 0.1042588  | 1.2893953  |
| C | -1.0511935 | -0.9866151 | 1.7362474  |
| C | -0.8651659 | -2.1262204 | 0.9148898  |
| C | -0.4079804 | -0.9336485 | 2.9981169  |
| C | -0.0477045 | -3.1790547 | 1.3439441  |
| C | 0.4066873  | -1.9940078 | 3.4195777  |
| C | 0.5915408  | -3.1174639 | 2.5945595  |
| H | -3.1579971 | 1.8598243  | 0.5675565  |
| H | -1.3504768 | -2.1624582 | -0.0635521 |
| H | -0.5520525 | -0.0555201 | 3.6341471  |
| H | 0.1065332  | -4.0450519 | 0.6931572  |
| H | 0.9021341  | -1.9413283 | 4.3950041  |
| H | 1.2417290  | -3.9362524 | 2.9172320  |
| C | 4.1330273  | -4.0131576 | 0.4605780  |
| C | 3.4528953  | -3.0727171 | 0.0708412  |
| C | 2.6405716  | -1.9814504 | -0.3757260 |
| C | 2.4549864  | -0.8420096 | 0.4459553  |
| C | 1.9972324  | -2.0338721 | -1.6375519 |
| C | 1.6378119  | 0.2111952  | 0.0172746  |
| C | 1.1828668  | -0.9731333 | -2.0586461 |
| C | 0.9984349  | 0.1501502  | -1.2333002 |

|   |           |            |            |
|---|-----------|------------|------------|
| H | 4.7465292 | -4.8287299 | 0.7924709  |
| H | 2.9404195 | -0.8061911 | 1.4243522  |
| H | 2.1409639 | -2.9118693 | -2.2738405 |
| H | 1.4839196 | 1.0770611  | 0.6683188  |
| H | 0.6873203 | -1.0253759 | -3.0340455 |
| H | 0.3484744 | 0.9692310  | -1.5556864 |

-----  
Dimer-02 (D2)

|   |            |            |            |
|---|------------|------------|------------|
| C | -0.3591684 | 1.0184963  | -1.0943867 |
| C | 0.0680281  | 0.0707849  | -0.4479843 |
| C | 0.5552514  | -1.0450584 | 0.3047408  |
| C | 0.1962636  | -1.2045678 | 1.6658267  |
| C | 1.3913878  | -2.0136470 | -0.3060431 |
| C | 0.6568832  | -2.3098887 | 2.3924293  |
| C | 1.8503603  | -3.1139962 | 0.4303372  |
| C | 1.4837027  | -3.2672603 | 1.7795970  |
| H | -0.7189040 | 1.8593423  | -1.6556707 |
| H | -0.4639513 | -0.4702281 | 2.1334009  |
| H | 1.6696192  | -1.8927282 | -1.3569807 |
| H | 0.3472976  | -2.4402072 | 3.4334039  |
| H | 2.4947403  | -3.8569263 | -0.0515766 |
| H | 1.8344832  | -4.1340019 | 2.3489542  |
| C | -2.2966498 | -4.5459627 | 4.4104224  |
| C | -2.4304423 | -4.0058499 | 3.3197400  |
| C | -2.5506268 | -3.3552603 | 2.0501840  |
| C | -3.2569386 | -2.1320053 | 1.9332249  |
| C | -1.9351761 | -3.9085000 | 0.8996403  |
| C | -3.3316587 | -1.4764715 | 0.6966184  |
| C | -2.0169463 | -3.2456691 | -0.3311078 |
| C | -2.7118247 | -2.0283833 | -0.4376610 |
| H | -2.2079257 | -5.0339999 | 5.3620619  |
| H | -3.7313821 | -1.7018140 | 2.8200966  |
| H | -1.3762351 | -4.8432914 | 0.9910720  |
| H | -3.8674566 | -0.5248587 | 0.6196483  |
| H | -1.5210065 | -3.6721672 | -1.2082353 |
| H | -2.7512663 | -1.5003321 | -1.3946355 |

-----  
Dimer-03 (D4)

|   |           |            |            |
|---|-----------|------------|------------|
| C | 0.7906486 | 0.8211200  | 1.1612140  |
| C | 1.0604167 | 0.9081868  | -0.0294038 |
| C | 1.3877438 | 1.0062777  | -1.4190965 |
| C | 1.0742283 | -0.0524236 | -2.3068213 |
| C | 2.0332277 | 2.1623605  | -1.9242143 |
| C | 1.4052173 | 0.0443064  | -3.6644363 |
| C | 2.3591948 | 2.2496664  | -3.2837725 |
| C | 2.0492949 | 1.1926706  | -4.1584663 |
| H | 0.5726855 | 0.7400550  | 2.2084726  |
| H | 0.5697238 | -0.9411273 | -1.9189372 |
| H | 2.2573981 | 2.9867965  | -1.2433536 |
| H | 1.1569964 | -0.7804164 | -4.3401668 |

|   |            |            |            |
|---|------------|------------|------------|
| H | 2.8567788  | 3.1485264  | -3.6623486 |
| H | 2.3083958  | 1.2638486  | -5.2202667 |
| C | -0.3779021 | 4.9934196  | -1.0924713 |
| C | -0.8487393 | 3.9595482  | -1.5480068 |
| C | -1.4113713 | 2.7560505  | -2.0800347 |
| C | -2.0118378 | 1.8038736  | -1.2192368 |
| C | -1.3786291 | 2.5027920  | -3.4735422 |
| C | -2.5689264 | 0.6312895  | -1.7455104 |
| C | -1.9404947 | 1.3282301  | -3.9901013 |
| C | -2.5384197 | 0.3891897  | -3.1307372 |
| H | 0.0169957  | 5.9067711  | -0.6917153 |
| H | -2.0182840 | 1.9894161  | -0.1426764 |
| H | -0.9059433 | 3.2319787  | -4.1365645 |
| H | -3.0282638 | -0.0976620 | -1.0698782 |
| H | -1.9086204 | 1.1440477  | -5.0687516 |
| H | -2.9772651 | -0.5277618 | -3.5384081 |

-----  
Dimer-04 (D3)

|   |            |            |            |
|---|------------|------------|------------|
| C | 5.5443504  | 1.8432931  | 2.1536000  |
| C | 4.5876369  | 2.0453527  | 1.4166753  |
| C | 3.4685488  | 2.2840229  | 0.5561587  |
| C | 3.0776646  | 1.3142640  | -0.4005599 |
| C | 2.7349097  | 3.4926547  | 0.6518427  |
| C | 1.9833500  | 1.5539105  | -1.2416044 |
| C | 1.6404807  | 3.7224838  | -0.1918515 |
| C | 1.2622623  | 2.7571433  | -1.1418878 |
| H | 6.3886910  | 1.6728008  | 2.7934647  |
| H | 3.6357413  | 0.3768830  | -0.4673473 |
| H | 3.0222427  | 4.2324531  | 1.4025994  |
| H | 1.6883790  | 0.7963881  | -1.9752604 |
| H | 1.0758305  | 4.6563203  | -0.1025522 |
| H | 0.4066277  | 2.9405548  | -1.8001488 |
| C | 0.7716525  | 3.8891038  | 3.9578406  |
| C | 0.8859153  | 2.7653430  | 3.4861961  |
| C | 1.0225641  | 1.4515773  | 2.9332370  |
| C | 2.0833120  | 0.6068266  | 3.3447267  |
| C | 0.1020858  | 0.9804231  | 1.9640844  |
| C | 2.2152893  | -0.6767700 | 2.7994098  |
| C | 0.2406400  | -0.3055392 | 1.4262963  |
| C | 1.2952061  | -1.1382805 | 1.8414080  |
| H | 0.6665014  | 4.8693538  | 4.3820628  |
| H | 2.8046411  | 0.9756835  | 4.0776829  |
| H | -0.7095626 | 1.6355068  | 1.6376503  |
| H | 3.0443387  | -1.3169311 | 3.1183220  |
| H | -0.4738828 | -0.6583049 | 0.6752795  |
| H | 1.4016626  | -2.1422324 | 1.4174174  |

-----  
Dimer-05 (D6)

|   |            |           |           |
|---|------------|-----------|-----------|
| C | -0.8643322 | 4.6113569 | 2.5037277 |
| C | -0.5075508 | 3.4542350 | 2.6830030 |

|   |            |            |            |
|---|------------|------------|------------|
| C | -0.0759081 | 2.1058429  | 2.8939616  |
| C | -0.0416654 | 1.5597372  | 4.2009819  |
| C | 0.3347650  | 1.3041404  | 1.7998178  |
| C | 0.3928949  | 0.2436748  | 4.4037632  |
| C | 0.7651239  | -0.0113542 | 2.0129451  |
| C | 0.7956091  | -0.5466521 | 3.3129669  |
| H | -1.1943349 | 5.6202708  | 2.3473562  |
| H | -0.3351969 | 2.1837660  | 5.0485360  |
| H | 0.3242733  | 1.7292339  | 0.7928787  |
| H | 0.4271057  | -0.1631205 | 5.4194547  |
| H | 1.0878969  | -0.6192508 | 1.1616629  |
| H | 1.1370379  | -1.5741405 | 3.4761083  |
| C | 2.7114194  | 2.9756981  | 6.3687897  |
| C | 2.9315306  | 2.8922370  | 5.1676251  |
| C | 3.1811504  | 2.7937737  | 3.7615463  |
| C | 2.8398494  | 3.8630427  | 2.8964223  |
| C | 3.7654344  | 1.6239091  | 3.2153022  |
| C | 3.0798082  | 3.7606684  | 1.5204596  |
| C | 4.0047011  | 1.5328442  | 1.8381365  |
| C | 3.6643201  | 2.5986916  | 0.9864758  |
| H | 2.5296444  | 3.0553588  | 7.4232042  |
| H | 2.3652040  | 4.7553325  | 3.3113892  |
| H | 4.0160690  | 0.7925994  | 3.8794995  |
| H | 2.7999572  | 4.5882675  | 0.8608408  |
| H | 4.4514191  | 0.6223377  | 1.4257554  |
| H | 3.8497192  | 2.5221744  | -0.0900445 |

-----  
Dimer-06 (D7)

|   |            |            |            |
|---|------------|------------|------------|
| C | 2.9214474  | 1.0936704  | -1.7100465 |
| C | 2.3088408  | 0.9646421  | -0.6579134 |
| C | 1.5617640  | 0.8253379  | 0.5552119  |
| C | 1.5289445  | 1.8774263  | 1.5033015  |
| C | 0.8219782  | -0.3568255 | 0.8089376  |
| C | 0.7700753  | 1.7481988  | 2.6738882  |
| C | 0.0661816  | -0.4754703 | 1.9814311  |
| C | 0.0373058  | 0.5740008  | 2.9175521  |
| H | 3.4846865  | 1.1974883  | -2.6174283 |
| H | 2.0854728  | 2.7966381  | 1.3016212  |
| H | 0.8325535  | -1.1625965 | 0.0707635  |
| H | 0.7370585  | 2.5748995  | 3.3899977  |
| H | -0.5130190 | -1.3867802 | 2.1609805  |
| H | -0.5612873 | 0.4800927  | 3.8293839  |
| C | -1.4255856 | 4.5171235  | 1.2230457  |
| C | -1.5513700 | 3.4582396  | 0.6222056  |
| C | -1.7057063 | 2.2251443  | -0.0880461 |
| C | -2.6219730 | 1.2437686  | 0.3661631  |
| C | -0.9426775 | 1.9679241  | -1.2537156 |
| C | -2.7737913 | 0.0414567  | -0.3366636 |
| C | -1.0989434 | 0.7616353  | -1.9482836 |
| C | -2.0145574 | -0.2041472 | -1.4950419 |

|   |            |            |            |
|---|------------|------------|------------|
| H | -1.3165872 | 5.4465933  | 1.7478139  |
| H | -3.2036265 | 1.4358557  | 1.2720428  |
| H | -0.2151580 | 2.7094360  | -1.5925728 |
| H | -3.4840493 | -0.7101795 | 0.0234061  |
| H | -0.4893283 | 0.5698396  | -2.8364850 |
| H | -2.1332504 | -1.1469084 | -2.0392726 |

-----  
Dimer-07

|   |            |            |            |
|---|------------|------------|------------|
| C | -1.4554985 | 4.1299248  | -1.4604319 |
| C | -0.6757847 | 3.3732895  | -0.8963090 |
| C | 0.2433131  | 2.4918712  | -0.2406149 |
| C | -0.1103205 | 1.8593639  | 0.9767925  |
| C | 1.5179288  | 2.2342292  | -0.8072784 |
| C | 0.7922049  | 0.9961822  | 1.6125418  |
| C | 2.4136057  | 1.3689210  | -0.1642514 |
| C | 2.0563034  | 0.7498317  | 1.0480654  |
| H | -2.1309384 | 4.8034968  | -1.9519061 |
| H | -1.1012310 | 2.0320327  | 1.4018161  |
| H | 1.7917699  | 2.7175544  | -1.7497891 |
| H | 0.4961658  | 0.4987287  | 2.5410371  |
| H | 3.3933859  | 1.1747479  | -0.6135701 |
| H | 2.7589151  | 0.0738451  | 1.5468794  |
| C | -1.1160880 | -2.2953009 | 3.5479553  |
| C | -1.7071503 | -1.5194243 | 2.8081508  |
| C | -2.3791625 | -0.5972066 | 1.9437368  |
| C | -3.1793267 | 0.4412063  | 2.4837071  |
| C | -2.2358705 | -0.6953852 | 0.5370844  |
| C | -3.8120094 | 1.3592454  | 1.6331578  |
| C | -2.8693814 | 0.2287904  | -0.3036233 |
| C | -3.6571038 | 1.2592540  | 0.2387495  |
| H | -0.6215992 | -2.9939370 | 4.1952110  |
| H | -3.2907601 | 0.5202901  | 3.5688707  |
| H | -1.6091535 | -1.4878194 | 0.1193192  |
| H | -4.4219086 | 2.1606973  | 2.0622054  |
| H | -2.7320608 | 0.1567951  | -1.3867610 |
| H | -4.1340306 | 1.9899296  | -0.4213282 |

-----  
Dimer-08

|   |           |            |           |
|---|-----------|------------|-----------|
| C | 2.5606233 | -2.0959345 | 5.8624070 |
| C | 2.9949360 | -1.5196995 | 4.8735164 |
| C | 3.5071500 | -0.8451547 | 3.7181451 |
| C | 2.6690826 | -0.5937484 | 2.6034985 |
| C | 4.8610573 | -0.4249452 | 3.6725983 |
| C | 3.1745976 | 0.0620141  | 1.4726435 |
| C | 5.3569237 | 0.2330421  | 2.5387057 |
| C | 4.5170413 | 0.4797183  | 1.4364926 |
| H | 2.1830196 | -2.5928598 | 6.7353251 |
| H | 1.6294800 | -0.9244701 | 2.6313701 |
| H | 5.5108037 | -0.6194548 | 4.5310749 |
| H | 2.5182754 | 0.2349108  | 0.6140393 |

|   |            |            |            |
|---|------------|------------|------------|
| H | 6.4043183  | 0.5522914  | 2.5144925  |
| H | 4.9095408  | 0.9939524  | 0.5526890  |
| C | 0.7704392  | -0.6244735 | -2.0191126 |
| C | 0.6129978  | -1.2560750 | -0.9823912 |
| C | 0.4431847  | -1.9790765 | 0.2417317  |
| C | -0.6028342 | -1.6402312 | 1.1368522  |
| C | 1.3303958  | -3.0297970 | 0.5845509  |
| C | -0.7489565 | -2.3345895 | 2.3463395  |
| C | 1.1771439  | -3.7161598 | 1.7964739  |
| C | 0.1405976  | -3.3715142 | 2.6820072  |
| H | 0.8913798  | -0.0887008 | -2.9410139 |
| H | -1.2877908 | -0.8288776 | 0.8750817  |
| H | 2.1426542  | -3.2867374 | -0.1006009 |
| H | -1.5557452 | -2.0594203 | 3.0328795  |
| H | 1.8788365  | -4.5140857 | 2.0578239  |
| H | 0.0351555  | -3.8987898 | 3.6349841  |

-----  
Dimer-09

|   |            |            |            |
|---|------------|------------|------------|
| C | -0.8450032 | 0.9399264  | 2.9731820  |
| C | 0.0240115  | 1.5059591  | 2.3231757  |
| C | 1.0443348  | 2.1461486  | 1.5482952  |
| C | 0.7163353  | 2.8173652  | 0.3432653  |
| C | 2.3981913  | 2.1034536  | 1.9673563  |
| C | 1.7208321  | 3.4268246  | -0.4212721 |
| C | 3.3955519  | 2.7159513  | 1.1958609  |
| C | 3.0617963  | 3.3778113  | 0.0004791  |
| H | -1.6098976 | 0.4603485  | 3.5538115  |
| H | -0.3265001 | 2.8458926  | 0.0161741  |
| H | 2.6533365  | 1.5807339  | 2.8930563  |
| H | 1.4573846  | 3.9355761  | -1.3540870 |
| H | 4.4387483  | 2.6697678  | 1.5244184  |
| H | 3.8445266  | 3.8445632  | -0.6051564 |
| C | 4.9122145  | 0.4243849  | -3.0390280 |
| C | 4.0502802  | -0.2281785 | -2.4639407 |
| C | 3.0416023  | -0.9905832 | -1.7899070 |
| C | 2.2461048  | -0.3931834 | -0.7796378 |
| C | 2.8265873  | -2.3521969 | -2.1241088 |
| C | 1.2607879  | -1.1425314 | -0.1217746 |
| C | 1.8385873  | -3.0934201 | -1.4610680 |
| C | 1.0537891  | -2.4924437 | -0.4596125 |
| H | 5.6686162  | 0.9914218  | -3.5466843 |
| H | 2.4092143  | 0.6544127  | -0.5187081 |
| H | 3.4398026  | -2.8145667 | -2.9030535 |
| H | 0.6545688  | -0.6696331 | 0.6573434  |
| H | 1.6807257  | -4.1444268 | -1.7269960 |
| H | 0.2834475  | -3.0757325 | 0.0556823  |

-----  
Dimer-10

|   |            |           |            |
|---|------------|-----------|------------|
| C | -3.8330542 | 3.0542710 | -0.1516454 |
| C | -3.3299032 | 2.1869935 | 0.5506392  |

|   |            |            |            |
|---|------------|------------|------------|
| C | -2.7340341 | 1.1681726  | 1.3605674  |
| C | -3.4568611 | -0.0073196 | 1.6824960  |
| C | -1.4083107 | 1.3166799  | 1.8383362  |
| C | -2.8624051 | -1.0097382 | 2.4616191  |
| C | -0.8246785 | 0.3111932  | 2.6187008  |
| C | -1.5467892 | -0.8540441 | 2.9339848  |
| H | -4.2856601 | 3.8288891  | -0.7403025 |
| H | -4.4811777 | -0.1218876 | 1.3160297  |
| H | -0.8412285 | 2.2114749  | 1.5715447  |
| H | -3.4297903 | -1.9150474 | 2.7019177  |
| H | 0.2017840  | 0.4362198  | 2.9767100  |
| H | -1.0859757 | -1.6384640 | 3.5436024  |
| C | 2.1148011  | 3.7077861  | -0.8251943 |
| C | 1.5250412  | 2.6353861  | -0.8500053 |
| C | 0.8307719  | 1.3830170  | -0.8692911 |
| C | -0.4801912 | 1.2966430  | -1.3996533 |
| C | 1.4401553  | 0.2155081  | -0.3442110 |
| C | -1.1633113 | 0.0734422  | -1.3959051 |
| C | 0.7475850  | -1.0023093 | -0.3450469 |
| C | -0.5551233 | -1.0786699 | -0.8695931 |
| H | 2.6357713  | 4.6459554  | -0.8146241 |
| H | -0.9633488 | 2.1978440  | -1.7854045 |
| H | 2.4532765  | 0.2793359  | 0.0633257  |
| H | -2.1840310 | 0.0283880  | -1.7868267 |
| H | 1.2254320  | -1.8953465 | 0.0705619  |
| H | -1.0970902 | -2.0295058 | -0.8572033 |

-----  
Dimer-11 (D9)

|   |            |            |           |
|---|------------|------------|-----------|
| C | 3.8137378  | -1.8639737 | 1.7551186 |
| C | 3.2303522  | -0.8534058 | 2.1236250 |
| C | 2.5161538  | 0.3101749  | 2.5555749 |
| C | 1.9372201  | 1.1911778  | 1.6074737 |
| C | 2.3618865  | 0.5868775  | 3.9374990 |
| C | 1.2227644  | 2.3188192  | 2.0352713 |
| C | 1.6457810  | 1.7169405  | 4.3559410 |
| C | 1.0743094  | 2.5859782  | 3.4085501 |
| H | 4.3301966  | -2.7476228 | 1.4317919 |
| H | 2.0497760  | 0.9753812  | 0.5416564 |
| H | 2.8020906  | -0.0952763 | 4.6696858 |
| H | 0.7775512  | 2.9905905  | 1.2941573 |
| H | 1.5306442  | 1.9192090  | 5.4257857 |
| H | 0.5136977  | 3.4661856  | 3.7390452 |
| C | 0.1243037  | -5.4660892 | 1.4938516 |
| C | -0.4203621 | -4.4326887 | 1.8609342 |
| C | -1.0605490 | -3.2250600 | 2.2906329 |
| C | -2.4550737 | -3.2060599 | 2.5494728 |
| C | -0.3100560 | -2.0339961 | 2.4628470 |
| C | -3.0785879 | -2.0229583 | 2.9696560 |
| C | -0.9423990 | -0.8555135 | 2.8835256 |
| C | -2.3258575 | -0.8459760 | 3.1377949 |



|   |            |            |           |
|---|------------|------------|-----------|
| H | 0.6012975  | -6.3718899 | 1.1721369 |
| H | -3.0352378 | -4.1238935 | 2.4167569 |
| H | 0.7646053  | -2.0447032 | 2.2641903 |
| H | -4.1562960 | -2.0197705 | 3.1664955 |
| H | -0.3521235 | 0.0566344  | 3.0125707 |
| H | -2.8171525 | 0.0760436  | 3.4662827 |

-----  
Dimer-12 (D10)

|   |            |            |            |
|---|------------|------------|------------|
| C | -2.1084000 | -2.5993328 | -4.0693490 |
| C | -1.5570394 | -2.9527582 | -3.0355789 |
| C | -0.8968348 | -3.3451479 | -1.8268265 |
| C | -1.3973433 | -2.9290763 | -0.5672641 |
| C | 0.2735180  | -4.1440445 | -1.8740786 |
| C | -0.7410119 | -3.3060306 | 0.6126444  |
| C | 0.9227177  | -4.5158459 | -0.6886109 |
| C | 0.4193045  | -4.0997314 | 0.5574465  |
| H | -2.6017659 | -2.3031635 | -4.9754809 |
| H | -2.2963663 | -2.3079570 | -0.5290663 |
| H | 0.6644649  | -4.4605843 | -2.8448781 |
| H | -1.1349210 | -2.9770423 | 1.5794491  |
| H | 1.8270928  | -5.1305214 | -0.7371277 |
| H | 0.9302718  | -4.3902636 | 1.4809473  |
| C | 3.2429849  | 4.0400564  | -3.3989019 |
| C | 2.8625928  | 2.9859610  | -2.9053595 |
| C | 2.4174250  | 1.7525790  | -2.3281097 |
| C | 1.3866221  | 0.9982224  | -2.9450168 |
| C | 3.0012429  | 1.2670181  | -1.1302955 |
| C | 0.9542213  | -0.2081110 | -2.3762060 |
| C | 2.5615118  | 0.0592920  | -0.5696338 |
| C | 1.5386182  | -0.6826401 | -1.1877849 |
| H | 3.5765773  | 4.9639288  | -3.8313111 |
| H | 0.9349144  | 1.3709497  | -3.8689999 |
| H | 3.7963589  | 1.8465759  | -0.6520382 |
| H | 0.1584868  | -0.7829084 | -2.8593724 |
| H | 3.0204515  | -0.3047803 | 0.3557430  |
| H | 1.1972808  | -1.6244978 | -0.7489416 |

-----  
Dimer-13 (D11)

|   |            |            |            |
|---|------------|------------|------------|
| C | -0.2903567 | 3.3166395  | 1.5562591  |
| C | -0.0487707 | 2.4181975  | 0.7600704  |
| C | 0.2340597  | 1.3670846  | -0.1713967 |
| C | -0.6873745 | 0.3054281  | -0.3621158 |
| C | 1.4402486  | 1.3722357  | -0.9173979 |
| C | -0.4071705 | -0.7213715 | -1.2744380 |
| C | 1.7116142  | 0.3407292  | -1.8274915 |
| C | 0.7918324  | -0.7079263 | -2.0098155 |
| H | -0.5017255 | 4.1042310  | 2.2539610  |
| H | -1.6179579 | 0.3001126  | 0.2128583  |
| H | 2.1527120  | 2.1895904  | -0.7726796 |
| H | -1.1243598 | -1.5354403 | -1.4148604 |

|   |            |            |            |
|---|------------|------------|------------|
| H | 2.6466783  | 0.3563946  | -2.3979476 |
| H | 1.0057353  | -1.5114187 | -2.7209406 |
| C | 1.4082549  | -3.9240706 | -4.7086815 |
| C | 0.3866468  | -3.8734557 | -4.0366982 |
| C | -0.8013532 | -3.7938461 | -3.2409076 |
| C | -0.8447303 | -4.3864353 | -1.9536358 |
| C | -1.9460013 | -3.1114097 | -3.7249135 |
| C | -2.0062094 | -4.2971062 | -1.1739671 |
| C | -3.1029937 | -3.0272111 | -2.9379937 |
| C | -3.1379442 | -3.6187402 | -1.6620454 |
| H | 2.2988955  | -3.9828563 | -5.3048668 |
| H | 0.0392298  | -4.9078210 | -1.5767828 |
| H | -1.9118203 | -2.6489935 | -4.7149814 |
| H | -2.0274871 | -4.7561695 | -0.1802377 |
| H | -3.9801026 | -2.4951537 | -3.3204388 |
| H | -4.0423569 | -3.5489957 | -1.0494348 |

-----  
Dimer-14

|   |            |            |            |
|---|------------|------------|------------|
| C | 2.0810574  | -0.2674870 | -1.4519770 |
| C | 1.9369829  | -1.2568479 | -0.7460699 |
| C | 1.7603676  | -2.4133041 | 0.0801049  |
| C | 1.8635835  | -2.3122044 | 1.4907187  |
| C | 1.4707105  | -3.6742106 | -0.5006108 |
| C | 1.6800248  | -3.4450487 | 2.2956383  |
| C | 1.2878702  | -4.8014434 | 0.3127138  |
| C | 1.3929771  | -4.6915411 | 1.7109540  |
| H | 2.2133343  | 0.5991784  | -2.0710706 |
| H | 2.0821371  | -1.3400040 | 1.9405104  |
| H | 1.3876924  | -3.7533786 | -1.5879043 |
| H | 1.7558570  | -3.3532366 | 3.3838711  |
| H | 1.0600130  | -5.7686292 | -0.1467917 |
| H | 1.2472650  | -5.5732021 | 2.3426766  |
| C | -4.0831027 | -5.7471584 | 4.6732785  |
| C | -3.8154431 | -4.9134008 | 3.8177014  |
| C | -3.5006170 | -3.9380535 | 2.8165773  |
| C | -4.4887142 | -3.0265330 | 2.3646888  |
| C | -2.1968710 | -3.8693165 | 2.2638247  |
| C | -4.1746753 | -2.0737305 | 1.3852678  |
| C | -1.8909309 | -2.9142076 | 1.2850861  |
| C | -2.8775526 | -2.0143893 | 0.8431378  |
| H | -4.3197897 | -6.4774299 | 5.4231529  |
| H | -5.4954629 | -3.0770606 | 2.7892440  |
| H | -1.4296369 | -4.5676914 | 2.6077092  |
| H | -4.9460580 | -1.3744803 | 1.0445250  |
| H | -0.8804351 | -2.8732739 | 0.8698369  |
| H | -2.6352874 | -1.2681871 | 0.0796012  |

-----  
Dimer-15 (D12)

|   |            |           |            |
|---|------------|-----------|------------|
| C | -2.5749399 | 1.9373867 | -0.0952805 |
| C | -1.6855365 | 2.3449832 | -0.8298447 |

|   |            |           |            |
|---|------------|-----------|------------|
| C | -0.6262396 | 2.8593338 | -1.6444611 |
| C | -0.5661801 | 2.5824570 | -3.0336672 |
| C | 0.3818964  | 3.6676626 | -1.0582361 |
| C | 0.4764196  | 3.1034197 | -3.8134868 |
| C | 1.4193960  | 4.1828160 | -1.8472538 |
| C | 1.4722620  | 3.9043987 | -3.2253670 |
| H | -3.3370722 | 1.6196380 | 0.5904952  |
| H | -1.3417961 | 1.9597792 | -3.4891065 |
| H | 0.3361499  | 3.8816879 | 0.0137358  |
| H | 0.5117593  | 2.8835476 | -4.8858523 |
| H | 2.1916084  | 4.8063000 | -1.3838143 |
| H | 2.2846737  | 4.3094196 | -3.8380319 |
| C | 0.5389513  | 4.4617678 | 2.7517516  |
| C | -0.5782479 | 3.9680207 | 2.8300787  |
| C | -1.8846300 | 3.3903481 | 2.9250769  |
| C | -3.0289980 | 4.1351653 | 2.5454978  |
| C | -2.0498629 | 2.0634043 | 3.3948697  |
| C | -4.3051153 | 3.5633897 | 2.6345798  |
| C | -3.3302273 | 1.4994351 | 3.4807378  |
| C | -4.4619295 | 2.2451243 | 3.1012001  |
| H | 1.5187741  | 4.8954801 | 2.6932484  |
| H | -2.9029910 | 5.1559514 | 2.1742909  |
| H | -1.1676911 | 1.4848526 | 3.6822314  |
| H | -5.1811388 | 4.1478457 | 2.3352947  |
| H | -3.4453170 | 0.4734481 | 3.8451062  |
| H | -5.4606205 | 1.8017427 | 3.1698700  |

-----  
Dimer-16 (D13)

|   |            |            |            |
|---|------------|------------|------------|
| C | 1.9350712  | -1.8882687 | -5.1961718 |
| C | 1.7972838  | -1.6211431 | -4.0096796 |
| C | 1.6346667  | -1.3072883 | -2.6214672 |
| C | 0.7863811  | -0.2447901 | -2.2188712 |
| C | 2.3161447  | -2.0580359 | -1.6294928 |
| C | 0.6248473  | 0.0551789  | -0.8588953 |
| C | 2.1499218  | -1.7493974 | -0.2721027 |
| C | 1.3053682  | -0.6936147 | 0.1178874  |
| H | 2.0539547  | -2.1225838 | -6.2369172 |
| H | 0.2469741  | 0.3323562  | -2.9742917 |
| H | 2.9703627  | -2.8787151 | -1.9375259 |
| H | -0.0472336 | 0.8689810  | -0.5696348 |
| H | 2.6806045  | -2.3369019 | 0.4849881  |
| H | 1.1766753  | -0.4583292 | 1.1794507  |
| C | -1.8177031 | 2.3945413  | -2.3968953 |
| C | -2.5405874 | 1.4285886  | -2.1887370 |
| C | -3.3943126 | 0.3041325  | -1.9442493 |
| C | -4.7954305 | 0.4853062  | -1.8186476 |
| C | -2.8536564 | -1.0016206 | -1.8265261 |
| C | -5.6313556 | -0.6145751 | -1.5818065 |
| C | -3.6989610 | -2.0947700 | -1.5900333 |
| C | -5.0873085 | -1.9067827 | -1.4668974 |

|   |            |            |            |
|---|------------|------------|------------|
| H | -1.1833364 | 3.2394997  | -2.5848875 |
| H | -5.2137169 | 1.4918614  | -1.9096672 |
| H | -1.7742881 | -1.1446613 | -1.9180074 |
| H | -6.7120078 | -0.4628174 | -1.4869193 |
| H | -3.2705708 | -3.0987600 | -1.5015484 |
| H | -5.7438673 | -2.7635695 | -1.2825895 |

-----  
Dimer-17 (D14)

|   |            |            |            |
|---|------------|------------|------------|
| C | -0.3891300 | 2.5582635  | -0.1401571 |
| C | -0.3933638 | 2.8718597  | 1.0431821  |
| C | -0.3913965 | 3.2400228  | 2.4279034  |
| C | -1.1352690 | 4.3603680  | 2.8788193  |
| C | 0.3551010  | 2.4885160  | 3.3713976  |
| C | -1.1304224 | 4.7146551  | 4.2352010  |
| C | 0.3537171  | 2.8503580  | 4.7257452  |
| C | -0.3877050 | 3.9627247  | 5.1634209  |
| H | -0.3896074 | 2.2724698  | -1.1759264 |
| H | -1.7119858 | 4.9428343  | 2.1545563  |
| H | 0.9310649  | 1.6246976  | 3.0272603  |
| H | -1.7095416 | 5.5817946  | 4.5704151  |
| H | 0.9341450  | 2.2613822  | 5.4439669  |
| H | -0.3865179 | 4.2423503  | 6.2222875  |
| C | 2.7560718  | -0.9752858 | -2.6208444 |
| C | 1.7739263  | -0.2890829 | -2.8710348 |
| C | 0.6257101  | 0.5150533  | -3.1624737 |
| C | -0.6808099 | 0.0180948  | -2.9222783 |
| C | 0.7783799  | 1.8226401  | -3.6906989 |
| C | -1.8017189 | 0.8115720  | -3.2039743 |
| C | -0.3490490 | 2.6084432  | -3.9691012 |
| C | -1.6414689 | 2.1074171  | -3.7277749 |
| H | 3.6173065  | -1.5763785 | -2.3994841 |
| H | -0.8006759 | -0.9869225 | -2.5088961 |
| H | 1.7846943  | 2.2096566  | -3.8721778 |
| H | -2.8047418 | 0.4197783  | -3.0076886 |
| H | -0.2186247 | 3.6177909  | -4.3720306 |
| H | -2.5189673 | 2.7258309  | -3.9411455 |

-----  
Dimer-18 (D15)

|   |            |            |            |
|---|------------|------------|------------|
| C | 0.0510225  | 0.2872865  | -1.1490906 |
| C | 0.8631966  | -0.6169881 | -1.2967104 |
| C | 1.8130382  | -1.6753497 | -1.4689102 |
| C | 2.9883005  | -1.7249066 | -0.6762611 |
| C | 1.5902857  | -2.6932861 | -2.4313026 |
| C | 3.9122411  | -2.7654619 | -0.8454168 |
| C | 2.5201530  | -3.7297596 | -2.5927840 |
| C | 3.6827709  | -3.7704413 | -1.8022795 |
| H | -0.6880353 | 1.0510568  | -0.9825277 |
| H | 3.1632378  | -0.9412427 | 0.0664445  |
| H | 0.6854257  | -2.6574830 | -3.0447439 |
| H | 4.8162879  | -2.7925095 | -0.2276530 |

|   |            |            |            |
|---|------------|------------|------------|
| H | 2.3373357  | -4.5095176 | -3.3399158 |
| H | 4.4070612  | -4.5815771 | -1.9317098 |
| C | -2.7474413 | 2.4543153  | 0.1458737  |
| C | -3.0068143 | 1.3756500  | 0.6650332  |
| C | -3.3308099 | 0.1231564  | 1.2819422  |
| C | -4.5457286 | -0.0215203 | 1.9996245  |
| C | -2.4484768 | -0.9826504 | 1.1860049  |
| C | -4.8662860 | -1.2442560 | 2.6050377  |
| C | -2.7795099 | -2.2009088 | 1.7956188  |
| C | -3.9859102 | -2.3370689 | 2.5057433  |
| H | -2.5248836 | 3.4052391  | -0.2995508 |
| H | -5.2269476 | 0.8310000  | 2.0738208  |
| H | -1.5123785 | -0.8786366 | 0.6307973  |
| H | -5.8071551 | -1.3453832 | 3.1564961  |
| H | -2.0911080 | -3.0487637 | 1.7149442  |
| H | -4.2401867 | -3.2909392 | 2.9799758  |

-----  
Dimer-19 (D8)

|   |            |            |            |
|---|------------|------------|------------|
| C | 0.3808224  | 2.2970985  | 2.5767165  |
| C | 1.5080895  | 2.4088769  | 1.7421879  |
| C | -0.8624682 | 1.9403411  | 2.0247986  |
| H | 2.4785276  | 2.6892278  | 2.1651723  |
| H | -1.7418325 | 1.8473564  | 2.6702556  |
| C | 1.3959260  | 2.1661061  | 0.3666204  |
| C | -0.9839250 | 1.6940956  | 0.6507828  |
| H | 2.2701396  | 2.2493039  | -0.2854907 |
| H | -1.9448629 | 1.3983273  | 0.2220501  |
| C | 0.1463757  | 1.8020137  | -0.1960433 |
| H | 0.4715879  | 2.4883789  | 3.6509374  |
| C | 0.0357750  | 1.5212333  | -1.5943551 |
| C | -0.0522313 | 1.2527376  | -2.7846719 |
| H | -0.1307700 | 0.9829311  | -3.8196491 |
| C | -0.4215748 | -1.5904188 | 1.8439258  |
| C | 0.8035134  | -1.3130395 | 1.2140313  |
| C | -1.5075836 | -2.0609487 | 1.0843692  |
| H | 1.6432194  | -0.9240539 | 1.7972156  |
| H | -2.4656909 | -2.2751654 | 1.5695226  |
| C | 0.9484916  | -1.5059109 | -0.1656745 |
| C | -1.3724174 | -2.2570385 | -0.2969683 |
| H | 1.8946988  | -1.2749075 | -0.6619933 |
| H | -2.2142112 | -2.6244183 | -0.8911660 |
| C | -0.1381761 | -1.9848371 | -0.9392691 |
| H | -0.5334788 | -1.4284698 | 2.9204721  |
| C | 0.0077984  | -2.1941266 | -2.3477851 |
| C | 0.1348366  | -2.3864386 | -3.5499914 |
| H | 0.2494214  | -2.5582569 | -4.6029259 |

-----  
\*\*\*\*\*

## Trimer

\*\*\*\*\*

### Trimer-01 (T1)

|   |            |            |            |
|---|------------|------------|------------|
| C | -4.7391921 | -2.7049565 | -5.5465996 |
| C | -3.5750624 | -2.5359914 | -5.2077600 |
| C | -2.2216651 | -2.3428681 | -4.7811801 |
| C | -1.7648278 | -1.0547082 | -4.4068253 |
| C | -1.3299387 | -3.4431992 | -4.7044958 |
| C | -0.4478354 | -0.8751892 | -3.9631707 |
| C | -0.0132049 | -3.2522004 | -4.2623596 |
| C | 0.4314720  | -1.9697327 | -3.8909873 |
| H | -5.7500695 | -2.8502284 | -5.8756234 |
| H | -2.4564541 | -0.2101101 | -4.4447019 |
| H | -1.6844477 | -4.4388192 | -4.9855163 |
| H | -0.1145810 | 0.1186354  | -3.6554282 |
| H | 0.6648361  | -4.1093191 | -4.2001055 |
| H | 1.4560063  | -1.8269859 | -3.5334917 |
| C | -4.5354077 | 1.8810604  | -3.4668626 |
| C | -3.4039251 | 1.9174156  | -3.0015388 |
| C | -2.0690233 | 1.9287570  | -2.4835424 |
| C | -1.0718247 | 2.7350841  | -3.0889993 |
| C | -1.7228126 | 1.1132238  | -1.3778694 |
| C | 0.2399470  | 2.7225675  | -2.5941439 |
| C | -0.4086681 | 1.1064166  | -0.8916929 |
| C | 0.5756312  | 1.9100650  | -1.4945600 |
| H | -5.5326253 | 1.8666163  | -3.8621945 |
| H | -1.3374530 | 3.3598431  | -3.9464540 |
| H | -2.4834560 | 0.4774345  | -0.9221975 |
| H | 1.0032292  | 3.3455517  | -3.0714883 |
| H | -0.1497706 | 0.4534149  | -0.0539026 |
| H | 1.6022126  | 1.9004881  | -1.1137630 |
| C | 0.9062742  | -2.5644104 | 0.5134828  |
| C | -0.2812143 | -2.3639692 | 0.2944640  |
| C | -1.6660309 | -2.1001715 | 0.0429284  |
| C | -2.2327230 | -2.3745025 | -1.2262854 |
| C | -2.4811866 | -1.5396820 | 1.0592686  |
| C | -3.5854325 | -2.0993746 | -1.4684250 |
| C | -3.8319536 | -1.2631964 | 0.8056781  |
| C | -4.3887549 | -1.5446797 | -0.4560963 |
| H | 1.9389226  | -2.7743354 | 0.7154369  |
| H | -1.6020348 | -2.7839291 | -2.0169321 |
| H | -2.0422150 | -1.3216612 | 2.0369686  |
| H | -4.0073195 | -2.3041183 | -2.4562778 |
| H | -4.4501809 | -0.8217653 | 1.5937915  |
| H | -5.4423425 | -1.3219842 | -0.6520646 |

---

### Trimer-02 (T1)

|   |           |            |            |
|---|-----------|------------|------------|
| C | 2.1025539 | -1.3773795 | 2.1772573  |
| C | 1.5293979 | -1.3369628 | 1.0971251  |
| C | 0.8681684 | -1.3296335 | -0.1722996 |

|   |            |            |            |
|---|------------|------------|------------|
| C | 1.3365727  | -0.5062508 | -1.2271094 |
| C | -0.2503645 | -2.1701239 | -0.3964038 |
| C | 0.6978745  | -0.5279527 | -2.4751909 |
| C | -0.8841268 | -2.1804449 | -1.6456153 |
| C | -0.4155445 | -1.3620003 | -2.6887724 |
| H | 2.5849707  | -1.4129926 | 3.1345304  |
| H | 2.2035630  | 0.1385456  | -1.0575821 |
| H | -0.5983664 | -2.8231507 | 0.4049844  |
| H | 1.0736023  | 0.1048627  | -3.2854572 |
| H | -1.7358880 | -2.8476340 | -1.8058181 |
| H | -0.9065837 | -1.3808340 | -3.6668579 |
| C | 2.2696049  | -5.1352421 | 3.4712283  |
| C | 1.3162324  | -5.1526241 | 2.7040952  |
| C | 0.1943288  | -5.1894075 | 1.8149758  |
| C | 0.3554317  | -5.6140601 | 0.4727301  |
| C | -1.0936898 | -4.8047508 | 2.2675275  |
| C | -0.7462825 | -5.6566381 | -0.3920545 |
| C | -2.1910284 | -4.8545977 | 1.3959281  |
| C | -2.0221931 | -5.2828905 | 0.0656908  |
| H | 3.1043228  | -5.1265083 | 4.1450545  |
| H | 1.3468749  | -5.8973372 | 0.1174184  |
| H | -1.2187557 | -4.4696153 | 3.3009273  |
| H | -0.6006979 | -5.9670156 | -1.4306650 |
| H | -3.1804903 | -4.5563331 | 1.7567917  |
| H | -2.8819142 | -5.3178834 | -0.6116389 |
| C | 0.2883641  | -5.4442239 | -4.5232646 |
| C | 1.1303667  | -5.3459337 | -3.6400218 |
| C | 2.0952805  | -5.2457823 | -2.5864485 |
| C | 2.3011904  | -4.0146296 | -1.9159347 |
| C | 2.8387198  | -6.3851989 | -2.1861286 |
| C | 3.2249898  | -3.9301807 | -0.8657879 |
| C | 3.7636422  | -6.2890625 | -1.1368314 |
| C | 3.9593537  | -5.0633436 | -0.4735382 |
| H | -0.4211981 | -5.5245909 | -5.3240445 |
| H | 1.7194957  | -3.1403680 | -2.2114621 |
| H | 2.6768588  | -7.3368268 | -2.7003750 |
| H | 3.3507993  | -2.9827665 | -0.3352922 |
| H | 4.3255356  | -7.1767453 | -0.8294114 |
| H | 4.6712885  | -4.9964434 | 0.3549912  |

-----  
Trimer-03 (T3)

|   |            |            |           |
|---|------------|------------|-----------|
| C | -0.1388440 | -1.9750228 | 5.5526116 |
| C | 1.2256811  | -1.6768800 | 5.7949594 |
| C | -0.4655041 | -3.0487374 | 4.6855736 |
| C | 2.2340920  | -2.4216762 | 5.1712102 |
| C | 0.5525011  | -3.7946090 | 4.0734422 |
| C | 1.9038642  | -3.4819318 | 4.3083945 |
| C | 1.3963806  | -0.1256407 | 1.2607825 |
| C | 1.8067970  | 1.1621996  | 0.8317602 |
| C | 0.8108726  | -0.2740952 | 2.5422252 |

|   |            |            |            |
|---|------------|------------|------------|
| C | 1.6271659  | 2.2730567  | 1.6679741  |
| C | 0.6276720  | 0.8436191  | 3.3675727  |
| C | 1.0328460  | 2.1191628  | 2.9350693  |
| C | 1.5923761  | -1.2662124 | 0.4174912  |
| C | 1.7895966  | -2.2452055 | -0.2900665 |
| C | -1.1711976 | -1.1856300 | 6.1536804  |
| C | -2.0517666 | -0.4912857 | 6.6445455  |
| H | 1.4811316  | -0.8473473 | 6.4600316  |
| H | -1.5173823 | -3.2771067 | 4.4931918  |
| H | 3.2809718  | -2.1614301 | 5.3419445  |
| H | 0.2876928  | -4.6157202 | 3.3998577  |
| H | 2.2673900  | 1.2756833  | -0.1536477 |
| H | 0.5156116  | -1.2668403 | 2.8857541  |
| H | 1.9515050  | 3.2619951  | 1.3283872  |
| H | 0.1690845  | 0.7110479  | 4.3515906  |
| H | 0.8890573  | 2.9910969  | 3.5816513  |
| H | 1.9446961  | -3.1005169 | -0.9187937 |
| H | -2.8287611 | 0.0955304  | 7.0955860  |
| H | 2.6970466  | -4.0495976 | 3.8129165  |
| C | 5.2048306  | -2.3881585 | 3.3060726  |
| C | 4.3867369  | -1.3806079 | 2.7374865  |
| C | 5.9099975  | -2.1130355 | 4.5053999  |
| C | 4.2728580  | -0.1298154 | 3.3591518  |
| C | 5.7938361  | -0.8565780 | 5.1171274  |
| C | 4.9757036  | 0.1372984  | 4.5473770  |
| C | 5.2976621  | -3.6785362 | 2.6919622  |
| C | 5.3580254  | -4.7897519 | 2.1820369  |
| H | 3.8307757  | -1.5972944 | 1.8230165  |
| H | 6.5363443  | -2.8925155 | 4.9480739  |
| H | 3.6192836  | 0.6294450  | 2.9223489  |
| H | 6.3408853  | -0.6552849 | 6.0438652  |
| H | 5.4389461  | -5.7539686 | 1.7183817  |
| H | 4.8827249  | 1.1148963  | 5.0316336  |

-----  
Trimer-04 (T6)

|   |            |            |            |
|---|------------|------------|------------|
| C | -4.9864586 | -2.1766642 | 3.2464910  |
| C | -3.8979928 | -2.4521492 | 2.7588754  |
| C | -2.6123603 | -2.7489514 | 2.2022877  |
| C | -2.3489094 | -2.5039332 | 0.8319133  |
| C | -1.5812011 | -3.2718318 | 3.0236180  |
| C | -1.0834854 | -2.7809200 | 0.2980719  |
| C | -0.3180488 | -3.5449437 | 2.4798612  |
| C | -0.0657927 | -3.3031178 | 1.1162536  |
| H | -5.9496387 | -1.9655185 | 3.6692562  |
| H | -3.1337055 | -2.0817130 | 0.2023127  |
| H | -1.7826102 | -3.4552880 | 4.0827770  |
| H | -0.8863599 | -2.5662053 | -0.7556377 |
| H | 0.4722310  | -3.9442165 | 3.1237163  |
| H | 0.9228234  | -3.5147799 | 0.6957285  |
| C | -2.3960109 | 5.5295015  | 1.5841948  |



|   |            |            |            |
|---|------------|------------|------------|
| C | -2.0371123 | 4.3688385  | 1.7338176  |
| C | -1.6209041 | 3.0092441  | 1.9039272  |
| C | -2.4632892 | 2.0752974  | 2.5601157  |
| C | -0.3639884 | 2.5734395  | 1.4114999  |
| C | -2.0610959 | 0.7410903  | 2.7071305  |
| C | 0.0301431  | 1.2369928  | 1.5681859  |
| C | -0.8158921 | 0.3162426  | 2.2110768  |
| H | -2.7074121 | 6.5482330  | 1.4554958  |
| H | -3.4319506 | 2.4098842  | 2.9424374  |
| H | 0.2859345  | 3.2903545  | 0.9021613  |
| H | -2.7293604 | 0.0243538  | 3.1920922  |
| H | 0.9951433  | 0.9088348  | 1.1701443  |
| H | -0.5163611 | -0.7297203 | 2.3094187  |
| C | 0.3092106  | -0.0405578 | -2.4751290 |
| C | -0.8748438 | -0.0885789 | -2.1683356 |
| C | -2.2559474 | -0.1727382 | -1.8003565 |
| C | -3.1165452 | -1.0877734 | -2.4586166 |
| C | -2.7755760 | 0.6422024  | -0.7646181 |
| C | -4.4642498 | -1.1822450 | -2.0841525 |
| C | -4.1250026 | 0.5427888  | -0.4012022 |
| C | -4.9738816 | -0.3666606 | -1.0563668 |
| H | 1.3379642  | 0.0323815  | -2.7703825 |
| H | -2.7155069 | -1.7203269 | -3.2556238 |
| H | -2.1145671 | 1.3353681  | -0.2431390 |
| H | -5.1173885 | -1.8979150 | -2.5935145 |
| H | -4.5063655 | 1.1713908  | 0.4085474  |
| H | -6.0255321 | -0.4472966 | -0.7634563 |

-----  
Trimer-05 (T4)

|   |            |            |            |
|---|------------|------------|------------|
| C | -3.8166071 | -0.9167778 | 2.3002181  |
| C | -2.9160301 | -1.7279050 | 2.4709192  |
| C | -1.8662756 | -2.6808804 | 2.6712135  |
| C | -2.1541568 | -3.9659789 | 3.1990396  |
| C | -0.5259916 | -2.3586404 | 2.3383478  |
| C | -1.1241565 | -4.9004206 | 3.3813892  |
| C | 0.4945577  | -3.3000218 | 2.5245839  |
| C | 0.2013978  | -4.5735090 | 3.0434436  |
| H | -4.6070087 | -0.2059593 | 2.1538635  |
| H | -3.1867167 | -4.2170851 | 3.4569660  |
| H | -0.3031028 | -1.3759250 | 1.9156246  |
| H | -1.3604215 | -5.8908022 | 3.7844441  |
| H | 1.5198103  | -3.0461912 | 2.2474237  |
| H | 0.9990796  | -5.3119597 | 3.1625438  |
| C | -0.9035914 | -1.4929761 | -1.4933112 |
| C | -0.7725243 | -2.7095300 | -1.4705916 |
| C | -0.6011697 | -4.1302509 | -1.4350006 |
| C | -0.0366872 | -4.8143905 | -2.5413450 |
| C | -0.9796519 | -4.8682232 | -0.2862906 |
| C | 0.1448624  | -6.2038543 | -2.4935143 |
| C | -0.7938112 | -6.2562520 | -0.2487403 |

|   |            |            |            |
|---|------------|------------|------------|
| C | -0.2328269 | -6.9300786 | -1.3484063 |
| H | -1.0631022 | -0.4324970 | -1.5208529 |
| H | 0.2575263  | -4.2462428 | -3.4283198 |
| H | -1.4037301 | -4.3452342 | 0.5711759  |
| H | 0.5863467  | -6.7208907 | -3.3513952 |
| H | -1.0764388 | -6.8090459 | 0.6519966  |
| H | -0.0833463 | -8.0137242 | -1.3126538 |
| C | 2.8912250  | -7.6042094 | 2.0235595  |
| C | 3.0519072  | -6.4586003 | 1.6235105  |
| C | 3.2223368  | -5.1082437 | 1.1780843  |
| C | 4.0654665  | -4.2203756 | 1.8934774  |
| C | 2.5353777  | -4.6378806 | 0.0316884  |
| C | 4.2152035  | -2.8936683 | 1.4656363  |
| C | 2.6900150  | -3.3096474 | -0.3863312 |
| C | 3.5299243  | -2.4342243 | 0.3250824  |
| H | 2.7790942  | -8.6180619 | 2.3565114  |
| H | 4.5923233  | -4.5814501 | 2.7811445  |
| H | 1.8721566  | -5.3140802 | -0.5090725 |
| H | 4.8660335  | -2.2156601 | 2.0270475  |
| H | 2.1331093  | -2.9525766 | -1.2568017 |
| H | 3.6458030  | -1.3960754 | -0.0026043 |

-----  
Trimer-06 (T5)

|   |            |            |            |
|---|------------|------------|------------|
| C | 4.0846412  | -0.1501883 | 3.1940883  |
| C | 3.5921556  | -0.1664178 | 2.0737995  |
| C | 2.9806587  | -0.2009220 | 0.7794200  |
| C | 2.1035582  | 0.8359947  | 0.3747989  |
| C | 3.2210733  | -1.2866573 | -0.1006328 |
| C | 1.4778471  | 0.7826100  | -0.8777398 |
| C | 2.5981823  | -1.3259584 | -1.3561746 |
| C | 1.7259933  | -0.2931232 | -1.7484438 |
| H | 4.5383118  | -0.1245143 | 4.1660918  |
| H | 1.8994880  | 1.6603038  | 1.0610864  |
| H | 3.8907372  | -2.0918354 | 0.2143833  |
| H | 0.7811200  | 1.5743889  | -1.1637603 |
| H | 2.7919248  | -2.1683982 | -2.0281288 |
| H | 1.2373644  | -0.3302784 | -2.7276623 |
| C | -0.5590374 | 0.1903775  | 5.9597340  |
| C | -0.7855915 | -0.2456367 | 4.8388096  |
| C | -1.0594648 | -0.7764669 | 3.5374363  |
| C | -2.3822463 | -1.1426729 | 3.1793752  |
| C | -0.0157640 | -0.9499397 | 2.5942476  |
| C | -2.6464228 | -1.6826213 | 1.9123200  |
| C | -0.2905716 | -1.4888306 | 1.3298698  |
| C | -1.6021531 | -1.8612491 | 0.9861770  |
| H | -0.3650685 | 0.5671664  | 6.9453656  |
| H | -3.1895364 | -1.0017787 | 3.9035272  |
| H | 1.0011294  | -0.6536362 | 2.8599324  |
| H | -3.6714639 | -1.9636980 | 1.6495222  |
| H | 0.5204948  | -1.6049303 | 0.6074572  |

|   |            |            |            |
|---|------------|------------|------------|
| H | -1.8116002 | -2.2795569 | -0.0036772 |
| C | 0.3368629  | 2.8326258  | 3.4233574  |
| C | -0.1772472 | 2.8381065  | 2.3135205  |
| C | -0.7606984 | 2.7915075  | 1.0076925  |
| C | -1.6176579 | 1.7194396  | 0.6549622  |
| C | -0.4741736 | 3.7928287  | 0.0458859  |
| C | -2.1703526 | 1.6540104  | -0.6305670 |
| C | -1.0335445 | 3.7187428  | -1.2379539 |
| C | -1.8834411 | 2.6505221  | -1.5813585 |
| H | 0.7562379  | 2.8137525  | 4.4100284  |
| H | -1.8299022 | 0.9415431  | 1.3901259  |
| H | 0.1893468  | 4.6192786  | 0.3159157  |
| H | -2.8243053 | 0.8156193  | -0.8905811 |
| H | -0.8038129 | 4.4968427  | -1.9730562 |
| H | -2.3181944 | 2.5968106  | -2.5849495 |

---

Trimer-07

|   |            |            |            |
|---|------------|------------|------------|
| C | 0.2325864  | -1.7020091 | -4.3058385 |
| C | 1.0088718  | -2.0430644 | -3.4231528 |
| C | 1.8986915  | -2.4415278 | -2.3743506 |
| C | 2.9116133  | -1.5627551 | -1.9178509 |
| C | 1.7625022  | -3.7163095 | -1.7680836 |
| C | 3.7702899  | -1.9539567 | -0.8815482 |
| C | 2.6243118  | -4.0979983 | -0.7301663 |
| C | 3.6317889  | -3.2206229 | -0.2857057 |
| H | -0.4251262 | -1.4169037 | -5.1042417 |
| H | 3.0061609  | -0.5748044 | -2.3701972 |
| H | 0.9777795  | -4.3935699 | -2.1167919 |
| H | 4.5418497  | -1.2613775 | -0.5328714 |
| H | 2.5082413  | -5.0828050 | -0.2664563 |
| H | 4.3037493  | -3.5238060 | 0.5237804  |
| C | 0.2046965  | 2.5047308  | 3.8259446  |
| C | 0.0046272  | 1.7230718  | 2.9053514  |
| C | -0.2212406 | 0.8163225  | 1.8205686  |
| C | 0.6503870  | -0.2813355 | 1.6067287  |
| C | -1.3143652 | 1.0081773  | 0.9366227  |
| C | 0.4445441  | -1.1502694 | 0.5276009  |
| C | -1.5159005 | 0.1276960  | -0.1363207 |
| C | -0.6356021 | -0.9487057 | -0.3490022 |
| H | 0.3742360  | 3.1859307  | 4.6375556  |
| H | 1.4936986  | -0.4324719 | 2.2864555  |
| H | -1.9898727 | 1.8524389  | 1.1000559  |
| H | 1.1364361  | -1.9785294 | 0.3620052  |
| H | -2.3606069 | 0.2884447  | -0.8142186 |
| H | -0.7771704 | -1.6164708 | -1.2033467 |
| C | 6.3537413  | 1.1771130  | 0.5198595  |
| C | 5.3602883  | 1.4010934  | -0.1595270 |
| C | 4.1932781  | 1.6286063  | -0.9576264 |
| C | 4.3103060  | 1.8772665  | -2.3492377 |
| C | 2.9041339  | 1.5842105  | -0.3709364 |

|   |           |           |            |
|---|-----------|-----------|------------|
| C | 3.1610529 | 2.0730526 | -3.1281230 |
| C | 1.7613790 | 1.7730479 | -1.1586031 |
| C | 1.8848622 | 2.0196492 | -2.5371194 |
| H | 7.2283792 | 1.0172024 | 1.1206302  |
| H | 5.3039936 | 1.9069643 | -2.8046980 |
| H | 2.8064037 | 1.3858464 | 0.6986783  |
| H | 3.2626668 | 2.2583494 | -4.2021724 |
| H | 0.7747793 | 1.7093281 | -0.6942723 |
| H | 0.9901222 | 2.1578871 | -3.1519807 |

-----  
Trimer-08

|   |            |            |            |
|---|------------|------------|------------|
| C | -1.1476795 | 3.4217540  | -3.2472235 |
| C | -0.7045967 | 3.6560383  | -2.1305406 |
| C | -0.1762731 | 3.9442556  | -0.8315428 |
| C | 1.1793413  | 3.6559380  | -0.5278053 |
| C | -0.9964841 | 4.5249005  | 0.1682551  |
| C | 1.6964710  | 3.9505831  | 0.7424984  |
| C | -0.4693068 | 4.8198928  | 1.4318290  |
| C | 0.8760536  | 4.5359835  | 1.7240214  |
| H | -1.5279281 | 3.2163783  | -4.2293477 |
| H | 1.8132197  | 3.2011269  | -1.2941711 |
| H | -2.0477243 | 4.7271789  | -0.0495869 |
| H | 2.7433794  | 3.7203349  | 0.9656743  |
| H | -1.1140510 | 5.2603818  | 2.1939523  |
| H | 1.2770723  | 4.7572849  | 2.7180408  |
| C | -3.1724027 | 1.5272066  | -0.6889526 |
| C | -2.6332494 | 1.1820205  | 0.3536296  |
| C | -1.9955182 | 0.8310236  | 1.5857897  |
| C | -2.6601213 | 0.0244567  | 2.5439947  |
| C | -0.6951675 | 1.3161377  | 1.8733542  |
| C | -2.0374413 | -0.2792160 | 3.7632931  |
| C | -0.0843135 | 1.0103174  | 3.0959255  |
| C | -0.7504001 | 0.2148846  | 4.0453809  |
| H | -3.6008283 | 1.8212522  | -1.6270130 |
| H | -3.6644192 | -0.3489817 | 2.3247820  |
| H | -0.1849124 | 1.9434637  | 1.1415427  |
| H | -2.5611721 | -0.8971480 | 4.4994848  |
| H | 0.9117796  | 1.4073719  | 3.3139152  |
| H | -0.2744989 | -0.0107437 | 5.0047468  |
| C | -0.4962920 | 3.8806425  | 6.5664648  |
| C | -1.2954635 | 4.1592717  | 5.6821054  |
| C | -2.2113603 | 4.4875960  | 4.6311756  |
| C | -2.7230761 | 3.4725016  | 3.7850516  |
| C | -2.5990911 | 5.8339759  | 4.4087811  |
| C | -3.5906877 | 3.8000666  | 2.7349418  |
| C | -3.4710688 | 6.1508739  | 3.3572462  |
| C | -3.9669207 | 5.1368699  | 2.5163985  |
| H | 0.1877374  | 3.6362690  | 7.3561791  |
| H | -2.4198930 | 2.4375999  | 3.9477130  |
| H | -2.2044833 | 6.6195329  | 5.0593695  |

|   |            |           |           |
|---|------------|-----------|-----------|
| H | -3.9520335 | 3.0101932 | 2.0709072 |
| H | -3.7600561 | 7.1933747 | 3.1899866 |
| H | -4.6377965 | 5.3906401 | 1.6892756 |

---

Trimer-09

|   |            |            |            |
|---|------------|------------|------------|
| C | -1.2051736 | 0.3557707  | 5.1003506  |
| C | -0.9417126 | 0.0115626  | 3.9555952  |
| C | -0.5958761 | -0.3763026 | 2.6216039  |
| C | -0.5091151 | 0.5950525  | 1.5935937  |
| C | -0.3069263 | -1.7310188 | 2.3161850  |
| C | -0.1339047 | 0.2224413  | 0.2971173  |
| C | 0.0630448  | -2.0955262 | 1.0138306  |
| C | 0.1535362  | -1.1215922 | 0.0016070  |
| H | -1.4615339 | 0.6497420  | 6.0999066  |
| H | -0.7159340 | 1.6426641  | 1.8243186  |
| H | -0.3683789 | -2.4816101 | 3.1091025  |
| H | -0.0500424 | 0.9882920  | -0.4766809 |
| H | 0.2867457  | -3.1437975 | 0.7903268  |
| H | 0.4542058  | -1.4074004 | -1.0113222 |
| C | 2.6113303  | 4.5347269  | 4.6476413  |
| C | 2.9876400  | 3.5383365  | 4.0442861  |
| C | 3.4135647  | 2.3852583  | 3.3095277  |
| C | 4.7125204  | 2.3335599  | 2.7420758  |
| C | 2.5329096  | 1.2913996  | 3.1201084  |
| C | 5.1129906  | 1.2126078  | 2.0014710  |
| C | 2.9379214  | 0.1814664  | 2.3669063  |
| C | 4.2273760  | 0.1357465  | 1.8088427  |
| H | 2.2969878  | 5.3953805  | 5.2060615  |
| H | 5.3912746  | 3.1790797  | 2.8841604  |
| H | 1.5324579  | 1.3255942  | 3.5570064  |
| H | 6.1152652  | 1.1860642  | 1.5625724  |
| H | 2.2359103  | -0.6398560 | 2.2026110  |
| H | 4.5379570  | -0.7294099 | 1.2149400  |
| C | 3.9401513  | 0.8374358  | -2.6416598 |
| C | 3.1189402  | 1.5572915  | -2.0888885 |
| C | 2.1488772  | 2.3900238  | -1.4436127 |
| C | 2.3079692  | 2.7554686  | -0.0840828 |
| C | 1.0078739  | 2.8447438  | -2.1529757 |
| C | 1.3474999  | 3.5555014  | 0.5493633  |
| C | 0.0492441  | 3.6397989  | -1.5089244 |
| C | 0.2157105  | 3.9986213  | -0.1576829 |
| H | 4.6704386  | 0.2244189  | -3.1336675 |
| H | 3.1774501  | 2.3966191  | 0.4674194  |
| H | 0.8825914  | 2.5620133  | -3.2020099 |
| H | 1.4860888  | 3.8246534  | 1.6006028  |
| H | -0.8304245 | 3.9805523  | -2.0643131 |
| H | -0.5351212 | 4.6214407  | 0.3396012  |

---

Trimer-10

|   |            |           |            |
|---|------------|-----------|------------|
| C | -1.5881943 | 0.3147550 | -3.8755863 |
|---|------------|-----------|------------|

|   |            |            |            |
|---|------------|------------|------------|
| C | -0.4848574 | -0.2147593 | -3.8901211 |
| C | 0.7941864  | -0.8583038 | -3.9039595 |
| C | 1.7231320  | -0.6353260 | -2.8578955 |
| C | 1.1381977  | -1.7414539 | -4.9590201 |
| C | 2.9708445  | -1.2738043 | -2.8750784 |
| C | 2.3862469  | -2.3799694 | -4.9645580 |
| C | 3.3076483  | -2.1450487 | -3.9265002 |
| H | -2.5429524 | 0.8043512  | -3.8788260 |
| H | 1.4528485  | 0.0266706  | -2.0334941 |
| H | 0.4186957  | -1.9201310 | -5.7631338 |
| H | 3.6762064  | -1.0963360 | -2.0581421 |
| H | 2.6396607  | -3.0636391 | -5.7810765 |
| H | 4.2826766  | -2.6432064 | -3.9363808 |
| C | -3.3622219 | -5.0338220 | 1.8628923  |
| C | -2.5381302 | -4.7635852 | 0.9988363  |
| C | -1.5711111 | -4.4436351 | -0.0074289 |
| C | -0.2295765 | -4.8881619 | 0.1176962  |
| C | -1.9361594 | -3.6715113 | -1.1402093 |
| C | 0.7154940  | -4.5624902 | -0.8652510 |
| C | -0.9806134 | -3.3467556 | -2.1127261 |
| C | 0.3476235  | -3.7880169 | -1.9797387 |
| H | -4.0847251 | -5.2735267 | 2.6190779  |
| H | 0.0543895  | -5.4846692 | 0.9893107  |
| H | -2.9692773 | -3.3261592 | -1.2385758 |
| H | 1.7485678  | -4.9082352 | -0.7559452 |
| H | -1.2679113 | -2.7284942 | -2.9672350 |
| H | 1.0917104  | -3.5165003 | -2.7321069 |
| C | 5.2721838  | -0.6414955 | 0.6463100  |
| C | 4.0606509  | -0.4679907 | 0.6225225  |
| C | 2.6437598  | -0.2710258 | 0.5580521  |
| C | 2.1021494  | 1.0371714  | 0.4735634  |
| C | 1.7647962  | -1.3826574 | 0.5502287  |
| C | 0.7147850  | 1.2200755  | 0.3849886  |
| C | 0.3806682  | -1.1901983 | 0.4567955  |
| C | -0.1491187 | 0.1091693  | 0.3761924  |
| H | 6.3337580  | -0.7880293 | 0.7022135  |
| H | 2.7786983  | 1.8963228  | 0.4699839  |
| H | 2.1762669  | -2.3937303 | 0.5968720  |
| H | 0.3076550  | 2.2337290  | 0.3145377  |
| H | -0.2806378 | -2.0586521 | 0.4258702  |
| H | -1.2307017 | 0.2557187  | 0.2955094  |

-----  
Trimer-11

|   |            |           |            |
|---|------------|-----------|------------|
| C | -2.6648955 | 2.4608536 | -0.0630061 |
| C | -1.8117099 | 2.2753235 | 0.7950325  |
| C | -0.8293310 | 2.0333158 | 1.8084329  |
| C | 0.4692309  | 1.5880342 | 1.4584606  |
| C | -1.1544069 | 2.2154698 | 3.1765406  |
| C | 1.4184262  | 1.3314719 | 2.4559748  |
| C | -0.1978659 | 1.9549789 | 4.1676214  |

|   |            |            |            |
|---|------------|------------|------------|
| C | 1.0894786  | 1.5132918  | 3.8108397  |
| H | -3.4056025 | 2.6531544  | -0.8150491 |
| H | 0.7158003  | 1.4307040  | 0.4080527  |
| H | -2.1572955 | 2.5584146  | 3.4473298  |
| H | 2.4142525  | 0.9776810  | 2.1750204  |
| H | -0.4563071 | 2.1000213  | 5.2219687  |
| H | 1.8333527  | 1.3101446  | 4.5880204  |
| C | 0.3604897  | -3.6583925 | -2.2689173 |
| C | 0.0694062  | -3.1853491 | -1.1777206 |
| C | -0.2419533 | -2.5959642 | 0.0892600  |
| C | -1.3849507 | -1.7704319 | 0.2370081  |
| C | 0.6036106  | -2.8121973 | 1.2070105  |
| C | -1.6726638 | -1.1813944 | 1.4747670  |
| C | 0.3056618  | -2.2170299 | 2.4399306  |
| C | -0.8313489 | -1.4026479 | 2.5781598  |
| H | 0.6001976  | -4.0992078 | -3.2173604 |
| H | -2.0297762 | -1.5899957 | -0.6273995 |
| H | 1.4927054  | -3.4385917 | 1.0914920  |
| H | -2.5391530 | -0.5215957 | 1.5707658  |
| H | 0.9696874  | -2.3788433 | 3.2948758  |
| H | -1.0423135 | -0.9127442 | 3.5325098  |
| C | 5.0404136  | -0.3873008 | 1.1423671  |
| C | 4.2068118  | 0.0144858  | 0.3407778  |
| C | 3.2119259  | 0.4920350  | -0.5719710 |
| C | 3.1718143  | 1.8616497  | -0.9382434 |
| C | 2.2429676  | -0.3947211 | -1.1037991 |
| C | 2.1821096  | 2.3267005  | -1.8150308 |
| C | 1.2560717  | 0.0803506  | -1.9777943 |
| C | 1.2219178  | 1.4396839  | -2.3362346 |
| H | 5.7911716  | -0.7444499 | 1.8206531  |
| H | 3.9131565  | 2.5486831  | -0.5210016 |
| H | 2.2609463  | -1.4478603 | -0.8179917 |
| H | 2.1537990  | 3.3866337  | -2.0866187 |
| H | 0.5114005  | -0.6183535 | -2.3687796 |
| H | 0.4451127  | 1.8101623  | -3.0120071 |

-----  
Trimer-12

|   |            |            |            |
|---|------------|------------|------------|
| C | 1.9920745  | 3.2023152  | -2.2613272 |
| C | 0.9402951  | 2.6000693  | -2.4324739 |
| C | -0.2877322 | 1.8889411  | -2.6241957 |
| C | -1.4955821 | 2.3714424  | -2.0572822 |
| C | -0.3143773 | 0.6868922  | -3.3766593 |
| C | -2.6918148 | 1.6618423  | -2.2369353 |
| C | -1.5147920 | -0.0150926 | -3.5467033 |
| C | -2.7064627 | 0.4666404  | -2.9776622 |
| H | 2.9138676  | 3.7315418  | -2.1135236 |
| H | -1.4785604 | 3.2981771  | -1.4768224 |
| H | 0.6159104  | 0.3091191  | -3.8102609 |
| H | -3.6158883 | 2.0396468  | -1.7872497 |
| H | -1.5156906 | -0.9572975 | -4.1008474 |

|   |            |            |            |
|---|------------|------------|------------|
| H | -3.6343241 | -0.0977745 | -3.0964440 |
| C | 1.6553714  | -4.9959467 | -1.5208981 |
| C | 0.9081955  | -4.1843519 | -0.9905620 |
| C | 0.0512135  | -3.2305990 | -0.3537151 |
| C | -0.6825546 | -3.5870185 | 0.8069076  |
| C | -0.0679482 | -1.9144125 | -0.8657036 |
| C | -1.5027104 | -2.6421694 | 1.4406799  |
| C | -0.8879008 | -0.9766408 | -0.2251201 |
| C | -1.6038159 | -1.3346686 | 0.9307487  |
| H | 2.3151460  | -5.7095979 | -1.9755037 |
| H | -0.5988553 | -4.6036351 | 1.2010674  |
| H | 0.4755783  | -1.6387519 | -1.7716011 |
| H | -2.0633838 | -2.9290817 | 2.3362627  |
| H | -0.9755197 | 0.0305969  | -0.6379452 |
| H | -2.2470610 | -0.6002972 | 1.4259977  |
| C | -1.0299398 | -4.0604514 | -3.9512799 |
| C | -2.0997547 | -3.5942678 | -3.5842418 |
| C | -3.3261308 | -3.0179783 | -3.1239051 |
| C | -4.3486664 | -2.6569059 | -4.0371591 |
| C | -3.5194602 | -2.7813089 | -1.7400650 |
| C | -5.5372297 | -2.0761177 | -3.5719311 |
| C | -4.7089261 | -2.1970465 | -1.2859359 |
| C | -5.7222932 | -1.8446552 | -2.1959304 |
| H | -0.0899580 | -4.4916249 | -4.2350554 |
| H | -4.1979181 | -2.8313465 | -5.1061846 |
| H | -2.7276027 | -3.0439942 | -1.0368689 |
| H | -6.3207599 | -1.8013675 | -4.2853876 |
| H | -4.8408494 | -2.0104309 | -0.2154628 |
| H | -6.6511101 | -1.3893999 | -1.8369492 |

-----  
Trimer-13 (T7)

|   |            |            |            |
|---|------------|------------|------------|
| C | -2.0819480 | -3.1832757 | 2.5015211  |
| C | -1.0914454 | -2.6928157 | 1.9745971  |
| C | 0.0519538  | -2.1227584 | 1.3284840  |
| C | 0.2128391  | -0.7171657 | 1.2658680  |
| C | 1.0202025  | -2.9582838 | 0.7172048  |
| C | 1.3154374  | -0.1646386 | 0.6006427  |
| C | 2.1191333  | -2.3950874 | 0.0568079  |
| C | 2.2720698  | -0.9979429 | -0.0040779 |
| H | -2.9222582 | -3.6196982 | 3.0056362  |
| H | -0.5394087 | -0.0706215 | 1.7211830  |
| H | 0.8871206  | -4.0427331 | 0.7504251  |
| H | 1.4097514  | 0.9227743  | 0.5322773  |
| H | 2.8491380  | -3.0482686 | -0.4308329 |
| H | 3.1199162  | -0.5628259 | -0.5414429 |
| C | 2.4743068  | -0.4482991 | -4.0315746 |
| C | 1.5755907  | -1.1493216 | -3.5841618 |
| C | 0.5394971  | -1.9836233 | -3.0535164 |
| C | -0.4165668 | -1.4560180 | -2.1512224 |
| C | 0.4710648  | -3.3537243 | -3.4109969 |



|   |            |            |            |
|---|------------|------------|------------|
| C | -1.4081619 | -2.2853776 | -1.6139271 |
| C | -0.5308492 | -4.1732662 | -2.8720763 |
| C | -1.4718793 | -3.6436461 | -1.9704009 |
| H | 3.2559073  | 0.1618758  | -4.4407320 |
| H | -0.3501088 | -0.4071689 | -1.8609340 |
| H | 1.2084436  | -3.7624553 | -4.1079835 |
| H | -2.1146925 | -1.8774525 | -0.8861136 |
| H | -0.5748317 | -5.2302057 | -3.1555906 |
| H | -2.2434172 | -4.2891113 | -1.5383039 |
| C | 0.1195092  | 2.3471068  | -2.4165758 |
| C | -0.5773269 | 2.2016496  | -1.4216388 |
| C | -1.3775802 | 1.9582899  | -0.2608280 |
| C | -2.4427969 | 1.0243948  | -0.3161155 |
| C | -1.1010736 | 2.6166933  | 0.9629586  |
| C | -3.2027815 | 0.7510681  | 0.8287518  |
| C | -1.8686082 | 2.3386113  | 2.1027918  |
| C | -2.9197201 | 1.4048304  | 2.0417056  |
| H | 0.7223268  | 2.4574824  | -3.2970292 |
| H | -2.6572053 | 0.5173068  | -1.2597607 |
| H | -0.2792384 | 3.3366176  | 1.0081839  |
| H | -4.0142048 | 0.0185640  | 0.7772710  |
| H | -1.6419443 | 2.8483815  | 3.0444395  |
| H | -3.5114316 | 1.1851217  | 2.9356746  |

-----  
Trimer-14 (T8)

|   |            |            |            |
|---|------------|------------|------------|
| C | -0.9051551 | 5.6558625  | -5.0394684 |
| C | -0.9230786 | 4.4578604  | -5.2858358 |
| C | -0.9663898 | 3.0447247  | -5.5081879 |
| C | -2.1941697 | 2.4080812  | -5.8167955 |
| C | 0.2071559  | 2.2589064  | -5.3811139 |
| C | -2.2429799 | 1.0182800  | -5.9872916 |
| C | 0.1469603  | 0.8688980  | -5.5520131 |
| C | -1.0766843 | 0.2430163  | -5.8550160 |
| H | -0.9018884 | 6.7059160  | -4.8208256 |
| H | -3.1035367 | 3.0053986  | -5.8953991 |
| H | 1.1536644  | 2.7477823  | -5.1343897 |
| H | -3.2015438 | 0.5403957  | -6.2118212 |
| H | 1.0567628  | 0.2703534  | -5.4415118 |
| H | -1.1199990 | -0.8434489 | -5.9824397 |
| C | -0.3198093 | 5.8593479  | 0.1697214  |
| C | -0.7341868 | 4.7544046  | -0.1572367 |
| C | -1.2240074 | 3.4636010  | -0.5384140 |
| C | -1.1396389 | 3.0310736  | -1.8859688 |
| C | -1.7999921 | 2.6033866  | 0.4305053  |
| C | -1.6099467 | 1.7619660  | -2.2478784 |
| C | -2.2734710 | 1.3376408  | 0.0569135  |
| C | -2.1759510 | 0.9122425  | -1.2804889 |
| H | 0.0670246  | 6.8166178  | 0.4618703  |
| H | -0.7213432 | 3.7011006  | -2.6398941 |
| H | -1.8683404 | 2.9373861  | 1.4698487  |

|   |            |            |            |
|---|------------|------------|------------|
| H | -1.5431386 | 1.4394439  | -3.2888085 |
| H | -2.7145510 | 0.6801345  | 0.8136623  |
| H | -2.5447051 | -0.0776573 | -1.5694493 |
| C | -3.2713219 | 5.9263229  | -2.0590285 |
| C | -3.8542860 | 5.1813460  | -2.8341383 |
| C | -4.5323416 | 4.2875357  | -3.7210159 |
| C | -4.7178037 | 2.9300564  | -3.3554170 |
| C | -5.0188170 | 4.7362668  | -4.9749850 |
| C | -5.3728398 | 2.0485981  | -4.2259335 |
| C | -5.6741624 | 3.8464267  | -5.8381927 |
| C | -5.8539681 | 2.5004260  | -5.4680538 |
| H | -2.7042137 | 6.5161278  | -1.3646532 |
| H | -4.3279808 | 2.5791068  | -2.3973314 |
| H | -4.8690807 | 5.7804767  | -5.2622600 |
| H | -5.5022892 | 1.0009027  | -3.9357925 |
| H | -6.0428477 | 4.2035565  | -6.8050239 |
| H | -6.3626468 | 1.8081348  | -6.1467348 |

-----  
Trimer-15

|   |            |            |            |
|---|------------|------------|------------|
| C | -1.9113656 | -5.4914156 | 3.5531023  |
| C | -0.8518033 | -4.9389085 | 3.8177531  |
| C | 0.3755060  | -4.2682913 | 4.1246306  |
| C | 1.2845249  | -3.9253843 | 3.0925215  |
| C | 0.6913878  | -3.9268790 | 5.4642548  |
| C | 2.4782641  | -3.2565224 | 3.3966243  |
| C | 1.8879372  | -3.2580478 | 5.7584252  |
| C | 2.7852198  | -2.9207863 | 4.7278586  |
| H | -2.8282419 | -6.0000747 | 3.3247513  |
| H | 1.0516373  | -4.1800149 | 2.0557110  |
| H | -0.0096709 | -4.1883584 | 6.2615104  |
| H | 3.1611021  | -2.9968652 | 2.5825469  |
| H | 2.1179551  | -2.9964209 | 6.7962091  |
| H | 3.7182003  | -2.3980632 | 4.9620441  |
| C | -4.2865023 | 2.5252370  | 1.8294717  |
| C | -3.4204495 | 1.7951442  | 2.2935044  |
| C | -2.4028181 | 0.9425949  | 2.8303964  |
| C | -1.2437270 | 1.4974721  | 3.4307645  |
| C | -2.5335902 | -0.4681594 | 2.7620701  |
| C | -0.2434463 | 0.6578670  | 3.9417272  |
| C | -1.5288300 | -1.2977411 | 3.2781759  |
| C | -0.3804177 | -0.7400190 | 3.8683331  |
| H | -5.0504702 | 3.1645801  | 1.4306177  |
| H | -1.1404111 | 2.5847083  | 3.4858863  |
| H | -3.4256595 | -0.8988243 | 2.2991795  |
| H | 0.6490637  | 1.0985828  | 4.3973738  |
| H | -1.6396330 | -2.3838520 | 3.2172087  |
| H | 0.4021248  | -1.3919277 | 4.2638515  |
| C | 3.0667648  | -4.1006979 | -0.0937177 |
| C | 2.4203024  | -3.0808796 | -0.2955671 |
| C | 1.6612538  | -1.8906406 | -0.5402088 |

|   |            |            |            |
|---|------------|------------|------------|
| C | 0.9435555  | -1.2626216 | 0.5085865  |
| C | 1.6146944  | -1.3283065 | -1.8416184 |
| C | 0.1973121  | -0.1031863 | 0.2587491  |
| C | 0.8677282  | -0.1666618 | -2.0807208 |
| C | 0.1569879  | 0.4491805  | -1.0336693 |
| H | 3.6280117  | -4.9973326 | 0.0860254  |
| H | 0.9699482  | -1.6860391 | 1.5145729  |
| H | 2.1659701  | -1.8120619 | -2.6531841 |
| H | -0.3555501 | 0.3635707  | 1.0771005  |
| H | 0.8395837  | 0.2577700  | -3.0899686 |
| H | -0.4290106 | 1.3543472  | -1.2248492 |

-----  
Trimer-16

|   |            |            |            |
|---|------------|------------|------------|
| C | 1.4048487  | 2.0514285  | -0.0459402 |
| C | 0.2021875  | 1.8353260  | 0.0120676  |
| C | -1.2055557 | 1.5941648  | 0.1041102  |
| C | -2.1293660 | 2.6547301  | -0.0764646 |
| C | -1.6952185 | 0.2998319  | 0.4022878  |
| C | -3.5056585 | 2.4213079  | 0.0457405  |
| C | -3.0726544 | 0.0759254  | 0.5215001  |
| C | -3.9835444 | 1.1320656  | 0.3463088  |
| H | 2.4588488  | 2.2468659  | -0.0565920 |
| H | -1.7546346 | 3.6566168  | -0.3047307 |
| H | -0.9986405 | -0.5248307 | 0.5569785  |
| H | -4.2093554 | 3.2487645  | -0.0944341 |
| H | -3.4315299 | -0.9291979 | 0.7648932  |
| H | -5.0597974 | 0.9550449  | 0.4436715  |
| C | -1.2262507 | -3.3579407 | 0.8621083  |
| C | -0.1756458 | -2.9546654 | 1.3437596  |
| C | 1.0407085  | -2.4618529 | 1.9163516  |
| C | 1.7304984  | -1.3775780 | 1.3181686  |
| C | 1.5607926  | -3.0439579 | 3.1000177  |
| C | 2.9083277  | -0.8886337 | 1.8966860  |
| C | 2.7432594  | -2.5489170 | 3.6682220  |
| C | 3.4202103  | -1.4703146 | 3.0696489  |
| H | -2.1315021 | -3.7250031 | 0.4185607  |
| H | 1.3300969  | -0.9055228 | 0.4183135  |
| H | 1.0271420  | -3.8776179 | 3.5650906  |
| H | 3.4127453  | -0.0296185 | 1.4469998  |
| H | 3.1333825  | -3.0020856 | 4.5851525  |
| H | 4.3318249  | -1.0732976 | 3.5263657  |
| C | 3.1037838  | 2.5519984  | 3.3491699  |
| C | 1.9445952  | 2.1702147  | 3.4473620  |
| C | 0.5858713  | 1.7323458  | 3.5541653  |
| C | -0.4776850 | 2.6448454  | 3.3414246  |
| C | 0.2860854  | 0.3826410  | 3.8654379  |
| C | -1.8068405 | 2.2146015  | 3.4417363  |
| C | -1.0467043 | -0.0381826 | 3.9576977  |
| C | -2.0959526 | 0.8737387  | 3.7486607  |
| H | 4.1185561  | 2.8947857  | 3.2904842  |

|   |            |            |           |
|---|------------|------------|-----------|
| H | -0.2467730 | 3.6816425  | 3.0826592 |
| H | 1.1014480  | -0.3256789 | 4.0201822 |
| H | -2.6207150 | 2.9210545  | 3.2547525 |
| H | -1.2652945 | -1.0877807 | 4.1777355 |
| H | -3.1356664 | 0.5376729  | 3.8022729 |

-----  
Trimer-17 (T9)

|   |            |            |           |
|---|------------|------------|-----------|
| C | -8.1534583 | 0.4724908  | 3.6209812 |
| C | -6.9444646 | 0.6398585  | 3.7184150 |
| C | -5.5281526 | 0.8082804  | 3.8416268 |
| C | -4.6817693 | 0.6235910  | 2.7203356 |
| C | -4.9525140 | 1.1385286  | 5.0946340 |
| C | -3.2949806 | 0.7711069  | 2.8523985 |
| C | -3.5641114 | 1.2844396  | 5.2156921 |
| C | -2.7326945 | 1.1073871  | 4.0959716 |
| H | -9.2157744 | 0.3518765  | 3.5305358 |
| H | -5.1224802 | 0.3481592  | 1.7591513 |
| H | -5.6041749 | 1.2738409  | 5.9625966 |
| H | -2.6427231 | 0.6235855  | 1.9873533 |
| H | -3.1294820 | 1.5340394  | 6.1888088 |
| H | -1.6500877 | 1.2315406  | 4.1835248 |
| C | -0.0841807 | 1.9906519  | 1.7497330 |
| C | 0.3126768  | 0.8481764  | 1.9370765 |
| C | 0.7719045  | -0.4896237 | 2.1622308 |
| C | 0.1966700  | -1.2833842 | 3.1863184 |
| C | 1.8063569  | -1.0396195 | 1.3625605 |
| C | 0.6495594  | -2.5921885 | 3.4032310 |
| C | 2.2506889  | -2.3500073 | 1.5868918 |
| C | 1.6759950  | -3.1302924 | 2.6070914 |
| H | -0.4466325 | 2.9881533  | 1.5920108 |
| H | -0.6116780 | -0.8813961 | 3.8013575 |
| H | 2.2513789  | -0.4305350 | 0.5703823 |
| H | 0.1852612  | -3.1892615 | 4.1937110 |
| H | 3.0493344  | -2.7642475 | 0.9624641 |
| H | 2.0265861  | -4.1534056 | 2.7780674 |
| C | -1.7220058 | -2.2133862 | 6.1540739 |
| C | -2.5336760 | -2.3649160 | 5.2504312 |
| C | -3.4898562 | -2.5365159 | 4.1986099 |
| C | -4.8762427 | -2.4416979 | 4.4743768 |
| C | -3.0662532 | -2.7987788 | 2.8710828 |
| C | -5.8136924 | -2.6047101 | 3.4464107 |
| C | -4.0117546 | -2.9579047 | 1.8495892 |
| C | -5.3860616 | -2.8609160 | 2.1321737 |
| H | -1.0072810 | -2.0823565 | 6.9433140 |
| H | -5.2042331 | -2.2222077 | 5.4935037 |
| H | -1.9988784 | -2.8661164 | 2.6500489 |
| H | -6.8795993 | -2.5022184 | 3.6674547 |
| H | -3.6735262 | -3.1551266 | 0.8270312 |
| H | -6.1214657 | -2.9780141 | 1.3295505 |

-----

Trimer-18

|   |            |            |            |
|---|------------|------------|------------|
| C | -3.3899547 | 3.2622334  | 0.5052337  |
| C | -2.5219457 | 2.6503090  | -0.1031014 |
| C | -1.5049341 | 1.9395894  | -0.8185267 |
| C | -0.2642102 | 2.5626280  | -1.1122373 |
| C | -1.7214684 | 0.6027525  | -1.2367661 |
| C | 0.7287682  | 1.8614934  | -1.8119509 |
| C | -0.7204269 | -0.0906585 | -1.9304056 |
| C | 0.5046024  | 0.5342968  | -2.2227159 |
| H | -4.1503553 | 3.8040263  | 1.0340218  |
| H | -0.0934485 | 3.5931543  | -0.7880055 |
| H | -2.6686961 | 0.1152093  | -1.0006396 |
| H | 1.6829330  | 2.3516213  | -2.0303480 |
| H | -0.8921984 | -1.1303426 | -2.2229758 |
| H | 1.2870950  | -0.0125211 | -2.7584732 |
| C | 0.6871882  | -0.1698084 | 1.2870595  |
| C | 0.8966030  | -1.1862254 | 1.9351969  |
| C | 1.0877148  | -2.4080403 | 2.6576736  |
| C | 0.8230970  | -3.6512185 | 2.0264147  |
| C | 1.5234816  | -2.4010941 | 4.0070799  |
| C | 0.9897805  | -4.8507832 | 2.7320161  |
| C | 1.6863523  | -3.6069103 | 4.7035271  |
| C | 1.4212402  | -4.8353655 | 4.0706268  |
| H | 0.4963390  | 0.7078717  | 0.6981463  |
| H | 0.4787769  | -3.6617490 | 0.9883850  |
| H | 1.7296923  | -1.4450031 | 4.4970643  |
| H | 0.7779661  | -5.8027151 | 2.2336647  |
| H | 2.0201755  | -3.5879672 | 5.7464591  |
| H | 1.5494048  | -5.7747570 | 4.6188862  |
| C | -0.8605760 | -4.2593405 | -1.4474682 |
| C | -1.7146365 | -3.5449984 | -0.9384406 |
| C | -2.7072715 | -2.6845259 | -0.3679920 |
| C | -3.9080363 | -2.4158407 | -1.0727920 |
| C | -2.4938224 | -2.0745553 | 0.8931722  |
| C | -4.8683918 | -1.5534856 | -0.5253063 |
| C | -3.4583545 | -1.2111248 | 1.4290747  |
| C | -4.6469530 | -0.9473068 | 0.7253312  |
| H | -0.1242956 | -4.9104696 | -1.8778334 |
| H | -4.0721453 | -2.8834291 | -2.0477453 |
| H | -1.5654799 | -2.2657314 | 1.4333176  |
| H | -5.7898291 | -1.3491427 | -1.0795637 |
| H | -3.2718271 | -0.7302655 | 2.3938354  |
| H | -5.3936974 | -0.2655328 | 1.1441174  |

-----  
Trimer-19

|   |            |            |           |
|---|------------|------------|-----------|
| C | -0.1676483 | -2.5283482 | 1.7760977 |
| C | -0.4428799 | -1.3570605 | 2.0004696 |
| C | -0.7739929 | 0.0163491  | 2.2327166 |
| C | 0.1435747  | 1.0421658  | 1.8945336 |
| C | -2.0319531 | 0.3710643  | 2.7830537 |

|   |            |            |            |
|---|------------|------------|------------|
| C | -0.1951057 | 2.3871582  | 2.0930403  |
| C | -2.3603896 | 1.7197709  | 2.9798628  |
| C | -1.4469876 | 2.7310533  | 2.6318817  |
| H | 0.0798029  | -3.5579040 | 1.6004994  |
| H | 1.1140412  | 0.7693059  | 1.4708773  |
| H | -2.7439664 | -0.4182633 | 3.0393063  |
| H | 0.5171722  | 3.1699656  | 1.8166496  |
| H | -3.3367098 | 1.9841704  | 3.3974016  |
| H | -1.7137827 | 3.7824246  | 2.7748450  |
| C | -3.8542393 | 4.3788568  | -0.6890445 |
| C | -3.2980441 | 3.3854048  | -1.1395510 |
| C | -2.6398474 | 2.2280520  | -1.6660845 |
| C | -2.2546239 | 1.1713133  | -0.8046680 |
| C | -2.3501404 | 2.1340985  | -3.0499835 |
| C | -1.6026260 | 0.0431403  | -1.3196307 |
| C | -1.6931448 | 1.0049025  | -3.5551604 |
| C | -1.3227110 | -0.0444733 | -2.6947722 |
| H | -4.3705040 | 5.2381016  | -0.3066403 |
| H | -2.4569636 | 1.2524425  | 0.2646673  |
| H | -2.6246925 | 2.9595135  | -3.7117878 |
| H | -1.3052322 | -0.7636694 | -0.6427612 |
| H | -1.4542756 | 0.9504172  | -4.6216370 |
| H | -0.8091192 | -0.9243292 | -3.0954888 |
| C | 1.9088957  | 2.7527960  | -6.1917575 |
| C | 1.5146472  | 3.0631836  | -5.0747745 |
| C | 1.0416016  | 3.4193643  | -3.7708729 |
| C | 0.3853104  | 4.6580936  | -3.5571571 |
| C | 1.2043801  | 2.5282780  | -2.6806780 |
| C | -0.0999860 | 4.9883351  | -2.2845853 |
| C | 0.7155604  | 2.8688459  | -1.4138402 |
| C | 0.0611374  | 4.0947580  | -1.2119522 |
| H | 2.2699320  | 2.4905016  | -7.1678489 |
| H | 0.2561178  | 5.3452878  | -4.3985180 |
| H | 1.6924605  | 1.5645136  | -2.8470677 |
| H | -0.6230976 | 5.9374148  | -2.1322175 |
| H | 0.8085239  | 2.1589326  | -0.5893057 |
| H | -0.3582421 | 4.3366279  | -0.2317909 |

---

Trimer-20

|   |            |            |            |
|---|------------|------------|------------|
| C | -0.0018001 | -0.2768725 | -3.6339887 |
| C | 0.0374861  | -1.3418514 | -3.0320833 |
| C | 0.0994325  | -2.5821411 | -2.3173874 |
| C | -1.0839935 | -3.3049526 | -2.0179113 |
| C | 1.3479950  | -3.1039391 | -1.8906785 |
| C | -1.0157102 | -4.5134035 | -1.3106796 |
| C | 1.4057848  | -4.3133906 | -1.1839595 |
| C | 0.2268380  | -5.0221192 | -0.8908226 |
| H | -0.0146722 | 0.6732833  | -4.1367309 |
| H | -2.0487064 | -2.9066261 | -2.3449870 |
| H | 2.2644766  | -2.5522873 | -2.1156520 |

|   |            |            |            |
|---|------------|------------|------------|
| H | -1.9367278 | -5.0617237 | -1.0850934 |
| H | 2.3758424  | -4.7047630 | -0.8598647 |
| H | 0.2757202  | -5.9662486 | -0.3380182 |
| C | 0.0861531  | 3.9983551  | -0.5380002 |
| C | 0.2705579  | 3.7239387  | -1.7162965 |
| C | 0.4852564  | 3.3970347  | -3.0939007 |
| C | -0.5953683 | 3.4127321  | -4.0135277 |
| C | 1.7782385  | 3.0422546  | -3.5541775 |
| C | -0.3815248 | 3.0799207  | -5.3588349 |
| C | 1.9813015  | 2.7064218  | -4.9000375 |
| C | 0.9055222  | 2.7248931  | -5.8060970 |
| H | -0.0781517 | 4.2460073  | 0.4932752  |
| H | -1.5944398 | 3.6814436  | -3.6592128 |
| H | 2.6101947  | 3.0171220  | -2.8471277 |
| H | -1.2224210 | 3.0933659  | -6.0599011 |
| H | 2.9808463  | 2.4147398  | -5.2362898 |
| H | 1.0664636  | 2.4591000  | -6.8557104 |
| C | 5.6030893  | 0.4928093  | -5.5125366 |
| C | 5.1323957  | 0.6541912  | -4.3937087 |
| C | 4.5599576  | 0.8635279  | -3.0979278 |
| C | 3.3821338  | 0.1747187  | -2.7143035 |
| C | 5.1468217  | 1.7843133  | -2.1924055 |
| C | 2.8068337  | 0.4037455  | -1.4578011 |
| C | 4.5637828  | 2.0057411  | -0.9366033 |
| C | 3.3942440  | 1.3172332  | -0.5651836 |
| H | 6.0324068  | 0.3318750  | -6.4828388 |
| H | 2.9057072  | -0.5097543 | -3.4193633 |
| H | 6.0521500  | 2.3215656  | -2.4886212 |
| H | 1.8829190  | -0.1151226 | -1.1896101 |
| H | 5.0208698  | 2.7236001  | -0.2476735 |
| H | 2.9339375  | 1.5050451  | 0.4096739  |

-----  
Trimer-21 (T10)

|   |            |            |            |
|---|------------|------------|------------|
| C | 3.7103246  | -0.5175235 | -0.2970176 |
| C | 3.5274657  | -1.6975062 | -0.5660933 |
| C | 3.2737358  | -3.0648504 | -0.9066900 |
| C | 1.9583377  | -3.4807637 | -1.2373649 |
| C | 4.3238861  | -4.0172953 | -0.9291009 |
| C | 1.7063160  | -4.8159127 | -1.5815516 |
| C | 4.0613017  | -5.3494435 | -1.2778276 |
| C | 2.7541776  | -5.7544055 | -1.6048430 |
| H | 3.8205899  | 0.5327054  | -0.0946050 |
| H | 1.1480838  | -2.7468189 | -1.2278397 |
| H | 5.3384071  | -3.6998700 | -0.6714161 |
| H | 0.6863995  | -5.1245719 | -1.8335330 |
| H | 4.8812647  | -6.0753307 | -1.2947000 |
| H | 2.5534452  | -6.7960152 | -1.8765628 |
| C | -1.6104000 | 1.2834762  | -6.6457793 |
| C | -1.1362096 | 1.0443902  | -5.5425202 |
| C | -0.5718331 | 0.7819079  | -4.2530537 |

|   |            |            |            |
|---|------------|------------|------------|
| C | -1.1561995 | 1.3376838  | -3.0873374 |
| C | 0.5887691  | -0.0218420 | -4.1259200 |
| C | -0.5834692 | 1.0996290  | -1.8299802 |
| C | 1.1521912  | -0.2539349 | -2.8655019 |
| C | 0.5708894  | 0.3053331  | -1.7144657 |
| H | -2.0446627 | 1.4720409  | -7.6087253 |
| H | -2.0558228 | 1.9525355  | -3.1827187 |
| H | 1.0488114  | -0.4399962 | -5.0246117 |
| H | -1.0389132 | 1.5406379  | -0.9373618 |
| H | 2.0577348  | -0.8580047 | -2.7747445 |
| H | 1.0289968  | 0.1304428  | -0.7373847 |
| C | 3.1479828  | 3.1249838  | 0.0668118  |
| C | 3.1386972  | 2.8866732  | -1.1342658 |
| C | 3.1335722  | 2.6003988  | -2.5370194 |
| C | 4.1236365  | 1.7574282  | -3.1005043 |
| C | 2.1383948  | 3.1576352  | -3.3775523 |
| C | 4.1204153  | 1.4919953  | -4.4765096 |
| C | 2.1387927  | 2.8785468  | -4.7496112 |
| C | 3.1313867  | 2.0514575  | -5.3049805 |
| H | 3.1653459  | 3.3622629  | 1.1131356  |
| H | 4.8814392  | 1.3111570  | -2.4513363 |
| H | 1.3656627  | 3.7950929  | -2.9406412 |
| H | 4.8930375  | 0.8437763  | -4.9027288 |
| H | 1.3507871  | 3.2922909  | -5.3856405 |
| H | 3.1272712  | 1.8362409  | -6.3783481 |

-----  
Trimer-22 (T11)

|   |            |            |            |
|---|------------|------------|------------|
| C | 1.9489064  | 0.0863079  | 1.6916815  |
| C | 1.4467769  | -1.0794970 | 1.0875298  |
| C | 2.4461983  | 1.1296096  | 0.8909954  |
| H | 1.0434235  | -1.8859277 | 1.7071989  |
| H | 2.8388106  | 2.0399459  | 1.3566316  |
| C | 1.4376943  | -1.2061388 | -0.3069659 |
| C | 2.4401736  | 1.0132563  | -0.5061307 |
| H | 1.0305194  | -2.1024048 | -0.7809592 |
| H | 2.8223765  | 1.8233109  | -1.1337465 |
| C | 1.9308936  | -0.1572594 | -1.1223186 |
| H | 1.9381182  | 0.1862062  | 2.7814130  |
| C | 1.8991209  | -0.2714001 | -2.5495286 |
| C | 1.8539865  | -0.3611247 | -3.7694456 |
| H | 1.8348855  | -0.4487353 | -4.8391418 |
| C | -1.7668950 | 0.0016388  | 1.1517058  |
| C | -2.2637768 | -1.2061963 | 0.6035865  |
| C | -1.3080611 | 1.0186221  | 0.2791246  |
| H | -2.6305482 | -1.9855071 | 1.2757792  |
| H | -0.9113818 | 1.9448397  | 0.7015959  |
| C | -2.3007718 | -1.3867027 | -0.7846070 |
| C | -1.3448960 | 0.8261310  | -1.1074015 |
| H | -2.7025648 | -2.3157290 | -1.1997576 |
| H | -0.9726058 | 1.6099372  | -1.7736808 |



|   |            |            |            |
|---|------------|------------|------------|
| C | -1.8415373 | -0.3740566 | -1.6440807 |
| H | -1.8696828 | -0.5197519 | -2.7275454 |
| C | -1.7286983 | 0.1920061  | 2.5694790  |
| C | -1.6952499 | 0.3546783  | 3.7830221  |
| H | -1.6661425 | 0.4973608  | 4.8458915  |
| C | -5.4402635 | 0.1043528  | 1.9037183  |
| C | -5.9689426 | -1.1159643 | 1.4476133  |
| C | -4.9863413 | 1.0588904  | 0.9769625  |
| H | -6.3238067 | -1.8631240 | 2.1655940  |
| H | -4.5593236 | 2.0026228  | 1.3292425  |
| C | -6.0420863 | -1.3855573 | 0.0737387  |
| C | -5.0561320 | 0.7998762  | -0.3973631 |
| H | -6.4487365 | -2.3348869 | -0.2862793 |
| H | -4.6874756 | 1.5314309  | -1.1203792 |
| C | -5.5817475 | -0.4297727 | -0.8663831 |
| H | -5.3683285 | 0.3058709  | 2.9769372  |
| C | -5.6307744 | -0.7097965 | -2.2696881 |
| C | -5.6549594 | -0.9569876 | -3.4688072 |
| H | -5.6964645 | -1.1648899 | -4.5207785 |

-----  
Trimer-23 (T12)

|   |            |            |            |
|---|------------|------------|------------|
| C | 2.5825912  | -3.8066575 | 1.2016213  |
| C | 2.6276715  | -2.9506948 | 2.0750907  |
| C | 2.6780321  | -1.9417488 | 3.0890613  |
| C | 3.3461026  | -0.7145909 | 2.8472409  |
| C | 2.0547775  | -2.1499785 | 4.3454203  |
| C | 3.3854232  | 0.2763911  | 3.8379432  |
| C | 2.0995785  | -1.1536468 | 5.3304287  |
| C | 2.7628341  | 0.0622413  | 5.0816310  |
| H | 2.5307353  | -4.5450621 | 0.4246043  |
| H | 3.8247651  | -0.5499294 | 1.8779835  |
| H | 1.5342772  | -3.0931003 | 4.5324773  |
| H | 3.9017015  | 1.2208971  | 3.6387684  |
| H | 1.6121238  | -1.3244553 | 6.2955649  |
| H | 2.7948076  | 0.8383964  | 5.8528193  |
| C | -3.3809839 | -2.8151483 | -4.3642051 |
| C | -2.4328110 | -2.5713529 | -3.6288013 |
| C | -1.3306104 | -2.2734053 | -2.7646425 |
| C | -0.2936386 | -1.4080909 | -3.1956925 |
| C | -1.2671839 | -2.8290328 | -1.4621508 |
| C | 0.7747752  | -1.1063098 | -2.3391785 |
| C | -0.1956966 | -2.5207624 | -0.6148120 |
| C | 0.8277535  | -1.6599325 | -1.0476737 |
| H | -4.2032078 | -3.0428527 | -5.0153306 |
| H | -0.3404192 | -0.9793015 | -4.2008965 |
| H | -2.0737780 | -3.4843039 | -1.1238789 |
| H | 1.5694013  | -0.4354456 | -2.6829936 |
| H | -0.1571976 | -2.9386726 | 0.3946776  |
| H | 1.6570772  | -1.4268271 | -0.3740275 |
| C | -0.2012102 | 0.1363905  | 2.6723288  |

|   |            |            |            |
|---|------------|------------|------------|
| C | -1.1056819 | -0.0025188 | 1.8593960  |
| C | -2.1523307 | -0.1842988 | 0.8989759  |
| C | -2.0996593 | 0.4718414  | -0.3564957 |
| C | -3.2455233 | -1.0428111 | 1.1788391  |
| C | -3.1088918 | 0.2651748  | -1.3050902 |
| C | -4.2513583 | -1.2417170 | 0.2227543  |
| C | -4.1868178 | -0.5913810 | -1.0218783 |
| H | 0.6004955  | 0.2407436  | 3.3794546  |
| H | -1.2509769 | 1.1226494  | -0.5813935 |
| H | -3.2900230 | -1.5509067 | 2.1465210  |
| H | -3.0473747 | 0.7618853  | -2.2782271 |
| H | -5.0886858 | -1.9106775 | 0.4489489  |
| H | -4.9635929 | -0.7624992 | -1.7734930 |

---

Trimer-24

|   |            |            |            |
|---|------------|------------|------------|
| C | 0.5975521  | -3.2553559 | -0.0000755 |
| C | 0.0609977  | -3.7390751 | -1.2207907 |
| C | 0.0647253  | -3.7386663 | 1.2224304  |
| C | -0.9828829 | -4.6751051 | -1.2143613 |
| C | -0.9791865 | -4.6746606 | 1.2194972  |
| C | -1.5085703 | -5.1454098 | 0.0034571  |
| C | 1.6443919  | -2.2789310 | -0.0018321 |
| C | 2.5306750  | -1.4355937 | -0.0033205 |
| H | 0.4642978  | -3.3635541 | -2.1652488 |
| H | 0.4709981  | -3.3629513 | 2.1655449  |
| H | -1.3938631 | -5.0346912 | -2.1631079 |
| H | -1.3872297 | -5.0339525 | 2.1696259  |
| H | -2.3268775 | -5.8722198 | 0.0048505  |
| H | 3.2786796  | -0.6646909 | -0.0045082 |
| C | 2.5194108  | 2.1454005  | -0.0027875 |
| C | 3.2067917  | 1.9239016  | 1.2181676  |
| C | 3.2045315  | 1.9241596  | -1.2250616 |
| C | 4.5392351  | 1.4874558  | 1.2121278  |
| C | 4.5369906  | 1.4877128  | -1.2215814 |
| C | 5.2091346  | 1.2653018  | -0.0053676 |
| C | 1.1508656  | 2.5654606  | -0.0014860 |
| C | -0.0218374 | 2.9141172  | -0.0003905 |
| H | 2.6804934  | 2.0877444  | 2.1625286  |
| H | 2.6764801  | 2.0881964  | -2.1684057 |
| H | 5.0562332  | 1.3125836  | 2.1610542  |
| H | 5.0522275  | 1.3130280  | -2.1714952 |
| H | 6.2472766  | 0.9186735  | -0.0063556 |
| H | -1.0608104 | 3.1864369  | 0.0005875  |
| C | -3.1153703 | 1.1092079  | 0.0015175  |
| C | -3.2687715 | 1.8148818  | -1.2193336 |
| C | -3.2658925 | 1.8129532  | 1.2238486  |
| C | -3.5577052 | 3.1868931  | -1.2131933 |
| C | -3.5548319 | 3.1849478  | 1.2206333  |
| C | -3.6997825 | 3.8780862  | 0.0044446  |
| C | -2.7946340 | -0.2859642 | 0.0004036  |

|   |            |            |            |
|---|------------|------------|------------|
| C | -2.5104013 | -1.4759673 | 0.0003629  |
| H | -3.1476024 | 1.2772046  | -2.1637361 |
| H | -3.1424690 | 1.2736858  | 2.1670493  |
| H | -3.6662176 | 3.7218458  | -2.1620855 |
| H | -3.6610813 | 3.7183286  | 2.1706638  |
| H | -3.9199774 | 4.9502132  | 0.0055660  |
| H | -2.2259945 | -2.5116358 | 0.0001704  |

-----  
Trimer-25 (T14)

|   |            |            |            |
|---|------------|------------|------------|
| C | 0.5327581  | -4.6172225 | 1.8274191  |
| C | 1.5112104  | -3.8876607 | 1.9175776  |
| C | 2.6417707  | -3.0155072 | 2.0241661  |
| C | 3.1836875  | -2.3976285 | 0.8691580  |
| C | 3.2252074  | -2.7466243 | 3.2882154  |
| C | 4.2816424  | -1.5339672 | 0.9800830  |
| C | 4.3238699  | -1.8815854 | 3.3885357  |
| C | 4.8560600  | -1.2729823 | 2.2371417  |
| H | -0.3163403 | -5.2687034 | 1.7489609  |
| H | 2.7287589  | -2.5958827 | -0.1051357 |
| H | 2.8052944  | -3.2183225 | 4.1809498  |
| H | 4.6881941  | -1.0579156 | 0.0823455  |
| H | 4.7651852  | -1.6791247 | 4.3694818  |
| H | 5.7119182  | -0.5953990 | 2.3199135  |
| C | 0.0055901  | 5.1097152  | 1.9111149  |
| C | 0.0272174  | 3.8855121  | 1.8953039  |
| C | 0.0513473  | 2.4528637  | 1.8755161  |
| C | -1.0882903 | 1.7226558  | 1.4527752  |
| C | 1.2143286  | 1.7464721  | 2.2777381  |
| C | -1.0599770 | 0.3210742  | 1.4341581  |
| C | 1.2328548  | 0.3450290  | 2.2541826  |
| C | 0.0977202  | -0.3721208 | 1.8332255  |
| H | -0.0081618 | 6.1824468  | 1.9269787  |
| H | -1.9858785 | 2.2624080  | 1.1432112  |
| H | 2.0944054  | 2.3089068  | 2.6038782  |
| H | -1.9463255 | -0.2295205 | 1.1039982  |
| H | 2.1356271  | -0.1906681 | 2.5606096  |
| H | 0.1190011  | -1.4660041 | 1.8169565  |
| C | -4.6403719 | -1.5289809 | -0.0807102 |
| C | -4.5709381 | -0.3134098 | 0.0443602  |
| C | -4.4662580 | 1.1062919  | 0.1991177  |
| C | -4.8113259 | 1.7220468  | 1.4287540  |
| C | -4.0010145 | 1.9134368  | -0.8697414 |
| C | -4.6895591 | 3.1101006  | 1.5814004  |
| C | -3.8830697 | 3.3007038  | -0.7067803 |
| C | -4.2250014 | 3.9037872  | 0.5171040  |
| H | -4.7175351 | -2.5929406 | -0.1967665 |
| H | -5.1639744 | 1.1003810  | 2.2562944  |
| H | -3.7278993 | 1.4394937  | -1.8165549 |
| H | -4.9502550 | 3.5740866  | 2.5376018  |
| H | -3.5144996 | 3.9132958  | -1.5352894 |

H -4.1194499 4.9854437 0.6444688

-----  
Trimer-26 (T15)

C 2.2499452 -1.5439993 1.0130185  
C 1.7667670 -0.5041162 1.4420998  
C 1.2075011 0.7186829 1.9380854  
C 2.0512146 1.7629328 2.3961853  
C -0.1982333 0.9061462 1.9788726  
C 1.4986490 2.9575963 2.8798988  
C -0.7414272 2.1046705 2.4624735  
C 0.1033237 3.1344733 2.9149455  
H 2.6697935 -2.4617685 0.6449463  
H 3.1356757 1.6226420 2.3661176  
H -0.8510646 0.1024821 1.6257565  
H 2.1617768 3.7559351 3.2305433  
H -1.8266128 2.2402014 2.4840513  
H -0.3251905 4.0685878 3.2905812  
C -1.8280928 6.6952721 4.2326216  
C -2.4571359 5.8282529 3.6402368  
C -3.1724999 4.8002597 2.9463000  
C -3.1324440 4.7276515 1.5311067  
C -3.9189030 3.8329442 3.6657660  
C -3.8236065 3.7122567 0.8565457  
C -4.6074184 2.8212303 2.9818953  
C -4.5628716 2.7569916 1.5772013  
H -1.2899997 7.4644950 4.7526702  
H -2.5504355 5.4680070 0.9757072  
H -3.9466937 3.8849568 4.7575624  
H -3.7815702 3.6633207 -0.2363067  
H -5.1785948 2.0780067 3.5475269  
H -5.0987861 1.9634431 1.0467054  
C 7.1842857 -3.3325064 -0.2738040  
C 6.0419268 -3.7614365 -0.1821411  
C 4.7050447 -4.2627179 -0.0748347  
C 3.8344782 -4.2366832 -1.1946008  
C 4.2298579 -4.7886101 1.1539273  
C 2.5248881 -4.7248906 -1.0831487  
C 2.9186703 -5.2743339 1.2549568  
C 2.0624396 -5.2451459 0.1393117  
H 8.1853127 -2.9533960 -0.3533129  
H 4.1966547 -3.8266081 -2.1412911  
H 4.8968758 -4.8034406 2.0201480  
H 1.8604627 -4.6938223 -1.9526367  
H 2.5611584 -5.6709271 2.2105913  
H 1.0372942 -5.6189462 0.2241186

-----  
Trimer-27 (T13)

C 1.7816841 -1.2605702 5.2425287  
C 1.8638839 0.0889846 4.8185876  
C 0.5454078 -1.7537784 5.7320200

|   |            |            |            |
|---|------------|------------|------------|
| H | 2.8093109  | 0.4645493  | 4.4195239  |
| H | 0.4786578  | -2.7955536 | 6.0590132  |
| C | 0.7379775  | 0.9198010  | 4.8839893  |
| C | -0.5740977 | -0.9133313 | 5.7962141  |
| H | 0.8081276  | 1.9545452  | 4.5359716  |
| H | -1.5239761 | -1.3061365 | 6.1739563  |
| C | -0.4828251 | 0.4243069  | 5.3726193  |
| C | 0.5860208  | -0.4142088 | 1.7167662  |
| C | 0.4706317  | 0.9348703  | 1.3023893  |
| C | -0.5681289 | -1.0962416 | 2.1726068  |
| H | 1.3581065  | 1.4567705  | 0.9364315  |
| H | -0.4776791 | -2.1333268 | 2.5048865  |
| C | -0.7707641 | 1.5819317  | 1.3436630  |
| C | -1.8056029 | -0.4412316 | 2.2106072  |
| H | -0.8496598 | 2.6220223  | 1.0115405  |
| H | -2.6894507 | -0.9764196 | 2.5723772  |
| C | -1.9132894 | 0.8986738  | 1.7972578  |
| H | -2.8823692 | 1.4072029  | 1.8285675  |
| C | 1.8507434  | -1.0781889 | 1.6720089  |
| C | 2.9336628  | -1.6442664 | 1.6300419  |
| H | 3.8829377  | -2.1400104 | 1.5973377  |
| C | 1.7739468  | -0.7796384 | -1.9435021 |
| C | 1.4251972  | 0.5202549  | -2.3906982 |
| C | 0.7565576  | -1.6318966 | -1.4471687 |
| H | 2.2080603  | 1.1807516  | -2.7747977 |
| H | 1.0274650  | -2.6251209 | -1.0810821 |
| C | 0.0921071  | 0.9494201  | -2.3414140 |
| C | -0.5725680 | -1.1920448 | -1.4000625 |
| H | -0.1648373 | 1.9565758  | -2.6860695 |
| H | -1.3457124 | -1.8512741 | -0.9952344 |
| C | -0.9101466 | 0.0971411  | -1.8453878 |
| C | 3.1346438  | -1.2224237 | -1.9928616 |
| C | 4.2972255  | -1.6017117 | -2.0447729 |
| H | 5.3164006  | -1.9339710 | -2.0943640 |
| H | -1.9473421 | 0.4411101  | -1.7921814 |
| C | 2.9287530  | -2.1145128 | 5.1778130  |
| C | 3.9096419  | -2.8452838 | 5.1319732  |
| H | 4.7695990  | -3.4854645 | 5.0940904  |
| H | -1.3627236 | 1.0736823  | 5.4095922  |

-----

\*\*\*\*\*

**Tetramer**

\*\*\*\*\*

Tetramer-01 (Te1)

|   |           |           |           |
|---|-----------|-----------|-----------|
| C | 4.3693764 | 1.6087143 | 1.2471760 |
| C | 3.2308719 | 1.4869810 | 1.6786463 |
| C | 1.8873652 | 1.3342197 | 2.1487684 |
| C | 1.2119162 | 2.4089564 | 2.7810951 |
| C | 1.2073558 | 0.1048727 | 1.9637851 |

|   |            |            |            |
|---|------------|------------|------------|
| C | -0.1163863 | 2.2545301  | 3.2040517  |
| C | -0.1185931 | -0.0392538 | 2.3915381  |
| C | -0.7872647 | 1.0327920  | 3.0081188  |
| H | 5.3712316  | 1.7113032  | 0.8783189  |
| H | 1.7344955  | 3.3590487  | 2.9213505  |
| H | 1.7222187  | -0.7220211 | 1.4750809  |
| H | -0.6326518 | 3.0957311  | 3.6770823  |
| H | -0.6387274 | -0.9866352 | 2.2315460  |
| H | -1.8296790 | 0.9154083  | 3.3188572  |
| C | 4.0689325  | 0.0071618  | -2.5666599 |
| C | 3.4457872  | -0.7521756 | -1.8364148 |
| C | 2.7250664  | -1.6376870 | -0.9727795 |
| C | 1.3229361  | -1.7977444 | -1.1064095 |
| C | 3.4097140  | -2.3631075 | 0.0355006  |
| C | 0.6271128  | -2.6672246 | -0.2555981 |
| C | 2.7046060  | -3.2289659 | 0.8829939  |
| C | 1.3132996  | -3.3858711 | 0.7391474  |
| H | 4.6165715  | 0.6629644  | -3.2150227 |
| H | 0.7859143  | -1.2247230 | -1.8644498 |
| H | 4.4893071  | -2.2323561 | 0.1462011  |
| H | -0.4541251 | -2.7740388 | -0.3655270 |
| H | 3.2433597  | -3.7790853 | 1.6608841  |
| H | 0.7647151  | -4.0587558 | 1.4058681  |
| C | -3.4137607 | 3.5548523  | 0.1877992  |
| C | -2.4573479 | 3.1790833  | -0.4770102 |
| C | -1.3501417 | 2.7086768  | -1.2531726 |
| C | -0.2069641 | 2.1679979  | -0.6130011 |
| C | -1.3921153 | 2.7565813  | -2.6699930 |
| C | 0.8624216  | 1.6772033  | -1.3730721 |
| C | -0.3167527 | 2.2619187  | -3.4219851 |
| C | 0.8102904  | 1.7175171  | -2.7776318 |
| H | -4.2439302 | 3.9117071  | 0.7659927  |
| H | -0.1740250 | 2.1284753  | 0.4759705  |
| H | -2.2736534 | 3.1742631  | -3.1639551 |
| H | 1.7368280  | 1.2570375  | -0.8705865 |
| H | -0.3612104 | 2.2993784  | -4.5153869 |
| H | 1.6453233  | 1.3191055  | -3.3614714 |
| C | -3.5638931 | -1.4825702 | 3.0285963  |
| C | -3.3041757 | -1.5728797 | 1.8359215  |
| C | -2.9842296 | -1.6910512 | 0.4451309  |
| C | -2.3936529 | -0.6087684 | -0.2542566 |
| C | -3.2520902 | -2.8996906 | -0.2480517 |
| C | -2.0763677 | -0.7378560 | -1.6130840 |
| C | -2.9311301 | -3.0181748 | -1.6075370 |
| C | -2.3420224 | -1.9393587 | -2.2932271 |
| H | -3.8153003 | -1.3966138 | 4.0679790  |
| H | -2.1863771 | 0.3237009  | 0.2730989  |
| H | -3.7119113 | -3.7331711 | 0.2902024  |
| H | -1.6172347 | 0.1026739  | -2.1375415 |
| H | -3.1403208 | -3.9559249 | -2.1319669 |

H -2.0881332 -2.0374556 -3.3536000

-----  
Tetramer-02 (Te2)

|   |            |            |            |
|---|------------|------------|------------|
| C | 2.3363047  | 1.7360888  | 2.2140270  |
| C | 1.5073863  | 0.5928935  | 2.3398449  |
| C | 1.7622205  | 2.9578695  | 1.7777441  |
| C | 0.1457005  | 0.6699050  | 2.0194343  |
| C | 0.3974461  | 3.0228943  | 1.4604821  |
| C | -0.4150071 | 1.8796386  | 1.5740573  |
| C | 1.2405120  | 1.0683039  | -2.5199949 |
| C | 1.8112468  | 0.5008793  | -3.6873706 |
| C | 1.9386034  | 0.9644017  | -1.2906552 |
| C | 3.0479160  | -0.1571102 | -3.6177762 |
| C | 3.1757360  | 0.3099504  | -1.2316979 |
| C | 3.7341376  | -0.2557879 | -2.3925236 |
| C | -0.0283219 | 1.7292387  | -2.5619932 |
| C | -1.1150303 | 2.2921929  | -2.5563393 |
| C | 3.7352404  | 1.6507050  | 2.5075949  |
| C | 4.9340932  | 1.5662473  | 2.7407554  |
| H | 1.9368838  | -0.3526550 | 2.6808223  |
| H | 2.3994019  | 3.8409481  | 1.6794915  |
| H | -0.4758199 | -0.2229514 | 2.1068510  |
| H | -0.0296850 | 3.9667776  | 1.1084827  |
| H | 1.2761429  | 0.5809160  | -4.6379054 |
| H | 1.4971638  | 1.3953477  | -0.3927011 |
| H | 3.4786688  | -0.5939520 | -4.5245953 |
| H | 3.7018391  | 0.2433882  | -0.2744005 |
| H | 4.6998170  | -0.7692026 | -2.3453738 |
| H | -2.0873201 | 2.7473847  | -2.5091760 |
| H | 5.9807622  | 1.5028611  | 2.9682148  |
| H | -1.4746509 | 1.9230264  | 1.3091013  |
| C | -3.8035361 | 1.0841549  | -0.1877430 |
| C | -3.0308963 | 0.0713596  | -0.8100092 |
| C | -4.1091132 | 0.9702935  | 1.1927752  |
| C | -2.5751832 | -1.0249790 | -0.0666876 |
| C | -3.6489131 | -0.1321512 | 1.9268907  |
| C | -2.8836709 | -1.1328142 | 1.3005875  |
| C | -4.2655530 | 2.2130907  | -0.9381504 |
| C | -4.6481215 | 3.1871037  | -1.5745415 |
| H | -2.7801138 | 0.1618985  | -1.8690211 |
| H | -4.7035333 | 1.7517870  | 1.6743210  |
| H | -1.9694879 | -1.7925157 | -0.5530168 |
| H | -3.8864623 | -0.2069678 | 2.9928005  |
| H | -5.0143271 | 4.0275954  | -2.1322084 |
| H | -2.5116558 | -1.9842588 | 1.8779758  |
| C | 0.3145578  | -2.7323718 | 3.4941774  |
| C | 0.2463561  | -2.9034680 | 2.2841486  |
| C | 0.1407877  | -3.0881526 | 0.8685974  |
| C | 0.8177225  | -2.2208081 | -0.0247681 |
| C | -0.6564291 | -4.1372979 | 0.3444028  |

|   |            |            |            |
|---|------------|------------|------------|
| C | 0.7013474  | -2.4026501 | -1.4093136 |
| C | -0.7712155 | -4.3083633 | -1.0420167 |
| C | -0.0930278 | -3.4438823 | -1.9221063 |
| H | 0.4071423  | -2.5979030 | 4.5545403  |
| H | 1.4177182  | -1.3992589 | 0.3694144  |
| H | -1.1815487 | -4.8050147 | 1.0330883  |
| H | 1.2262508  | -1.7235227 | -2.0850270 |
| H | -1.3933062 | -5.1181367 | -1.4362788 |
| H | -0.1869522 | -3.5797791 | -3.0043122 |

-----  
Tetramer-03 (Te5)

|   |            |            |            |
|---|------------|------------|------------|
| C | 1.0146850  | -2.7010947 | 1.5366915  |
| C | -0.1358949 | -1.9473927 | 1.1937080  |
| C | 1.8422370  | -2.2585170 | 2.6003142  |
| C | -0.4465659 | -0.7753607 | 1.8952953  |
| C | 1.5229022  | -1.0831347 | 3.2950303  |
| C | 0.3815945  | -0.3383953 | 2.9440847  |
| C | 3.2194920  | 1.2118147  | -0.3772882 |
| C | 3.6746593  | 1.5791421  | -1.6695860 |
| C | 2.4925746  | 0.0060170  | -0.2165909 |
| C | 3.3991575  | 0.7566029  | -2.7713529 |
| C | 2.2269071  | -0.8116210 | -1.3224725 |
| C | 2.6751026  | -0.4386369 | -2.6015695 |
| C | 3.4656757  | 2.0592165  | 0.7503198  |
| C | 3.6471252  | 2.7925567  | 1.7130728  |
| C | 1.3454005  | -3.8837750 | 0.7999327  |
| C | 1.6350162  | -4.8813729 | 0.1520295  |
| H | -0.7644043 | -2.2833059 | 0.3684415  |
| H | 2.7338848  | -2.8355005 | 2.8605925  |
| H | -1.3309707 | -0.1958056 | 1.6209588  |
| H | 2.1726133  | -0.7402992 | 4.1063226  |
| H | 4.2330925  | 2.5108570  | -1.7956944 |
| H | 2.1340494  | -0.2748083 | 0.7734588  |
| H | 3.7531016  | 1.0471349  | -3.7659427 |
| H | 1.6630339  | -1.7365358 | -1.1806503 |
| H | 2.4630007  | -1.0766575 | -3.4657535 |
| H | 3.8234875  | 3.4312943  | 2.5569662  |
| H | 1.8816016  | -5.7717775 | -0.3931870 |
| H | 0.1396161  | 0.5881800  | 3.4715421  |
| C | -1.4414674 | 2.7362252  | 0.6992927  |
| C | -0.1872988 | 2.3612190  | 0.1539870  |
| C | -2.4504389 | 3.2381997  | -0.1625815 |
| C | 0.0472266  | 2.4893158  | -1.2220452 |
| C | -2.2034210 | 3.3659556  | -1.5362590 |
| C | -0.9553277 | 2.9935188  | -2.0689571 |
| C | -1.6991144 | 2.6028136  | 2.1014631  |
| C | -1.9358148 | 2.4851015  | 3.2963284  |
| H | 0.5888781  | 1.9654911  | 0.8112986  |
| H | -3.4220904 | 3.5131405  | 0.2563911  |
| H | 1.0134843  | 2.1872639  | -1.6324918 |



|   |            |            |            |
|---|------------|------------|------------|
| H | -2.9890588 | 3.7499021  | -2.1943933 |
| H | -2.1397650 | 2.3862407  | 4.3449146  |
| H | -0.7690940 | 3.0879227  | -3.1433245 |
| C | -4.8451536 | -0.3118753 | 0.9998089  |
| C | -4.0330929 | -0.7472186 | 0.1946827  |
| C | -3.0597841 | -1.2513361 | -0.7266832 |
| C | -3.0337682 | -2.6266791 | -1.0730037 |
| C | -2.0905140 | -0.3802566 | -1.2829727 |
| C | -2.0506689 | -3.1136212 | -1.9464012 |
| C | -1.1107982 | -0.8773242 | -2.1512522 |
| C | -1.0846713 | -2.2428253 | -2.4837289 |
| H | -5.5635273 | 0.0705668  | 1.6989659  |
| H | -3.7777861 | -3.3012399 | -0.6406212 |
| H | -2.1040274 | 0.6753905  | -1.0143306 |
| H | -2.0306496 | -4.1781474 | -2.1995650 |
| H | -0.3531023 | -0.1978347 | -2.5488760 |
| H | -0.3073966 | -2.6319664 | -3.1488782 |

-----  
Tetramer-04 (Te3)

|   |            |            |            |
|---|------------|------------|------------|
| C | 5.2361464  | -2.6578910 | 1.3872992  |
| C | 4.0232711  | -2.5751036 | 1.2414394  |
| C | 2.6095032  | -2.4561895 | 1.0466614  |
| C | 1.9090373  | -1.3337694 | 1.5542765  |
| C | 1.8953029  | -3.4445449 | 0.3222793  |
| C | 0.5315375  | -1.2038143 | 1.3366313  |
| C | 0.5164213  | -3.3018054 | 0.1085214  |
| C | -0.1708599 | -2.1824784 | 0.6125279  |
| H | 6.2939749  | -2.7522769 | 1.5394441  |
| H | 2.4528322  | -0.5579915 | 2.0977159  |
| H | 2.4344639  | -4.3096715 | -0.0735509 |
| H | 0.0082840  | -0.3264831 | 1.7225309  |
| H | -0.0225356 | -4.0644751 | -0.4624507 |
| H | -1.2429956 | -2.0684288 | 0.4362033  |
| C | 2.0594420  | 1.8347196  | 3.4154874  |
| C | 1.2287086  | 2.2071602  | 2.5977362  |
| C | 0.2428402  | 2.6528896  | 1.6592274  |
| C | -0.7875053 | 3.5337238  | 2.0790136  |
| C | 0.2788767  | 2.2219416  | 0.3090543  |
| C | -1.7596368 | 3.9672862  | 1.1669348  |
| C | -0.6975329 | 2.6640405  | -0.5939950 |
| C | -1.7178782 | 3.5343200  | -0.1713359 |
| H | 2.8001142  | 1.5172444  | 4.1238445  |
| H | -0.8123689 | 3.8672541  | 3.1200626  |
| H | 1.0622754  | 1.5358981  | -0.0182042 |
| H | -2.5525751 | 4.6427970  | 1.5031694  |
| H | -0.6656213 | 2.3140789  | -1.6280309 |
| H | -2.4829147 | 3.8685150  | -0.8794099 |
| C | -1.1599664 | -0.4648371 | -3.0776008 |
| C | -0.0229066 | -0.0620057 | -2.8698631 |
| C | 1.2887285  | 0.4176330  | -2.5570966 |

|   |            |            |            |
|---|------------|------------|------------|
| C | 2.1403189  | -0.3468532 | -1.7213405 |
| C | 1.7380994  | 1.6733748  | -3.0376404 |
| C | 3.4039915  | 0.1423373  | -1.3634206 |
| C | 3.0038451  | 2.1542926  | -2.6758426 |
| C | 3.8390951  | 1.3934773  | -1.8365831 |
| H | -2.1507139 | -0.8449514 | -3.2476361 |
| H | 1.7939078  | -1.3109640 | -1.3477836 |
| H | 1.0838072  | 2.2639584  | -3.6852538 |
| H | 4.0424905  | -0.4538389 | -0.7045086 |
| H | 3.3381558  | 3.1284794  | -3.0470721 |
| H | 4.8252935  | 1.7757373  | -1.5534363 |
| C | -4.6385554 | -1.7719941 | -2.8718381 |
| C | -4.2673668 | -1.5090616 | -1.7349004 |
| C | -3.8367447 | -1.2075172 | -0.4025178 |
| C | -3.1184426 | -0.0169833 | -0.1255512 |
| C | -4.1301880 | -2.1008213 | 0.6597574  |
| C | -2.7211184 | 0.2774654  | 1.1854574  |
| C | -3.7210876 | -1.8002612 | 1.9662730  |
| C | -3.0216919 | -0.6093221 | 2.2339893  |
| H | -4.9798713 | -1.9986611 | -3.8635909 |
| H | -2.8624733 | 0.6615519  | -0.9417496 |
| H | -4.6776394 | -3.0230663 | 0.4457067  |
| H | -2.1659667 | 1.1968564  | 1.3824387  |
| H | -3.9480459 | -2.4997770 | 2.7770856  |
| H | -2.7016008 | -0.3788177 | 3.2549962  |

-----  
Tetramer-05 (Te3)

|   |            |            |            |
|---|------------|------------|------------|
| C | 0.4960119  | 3.2798717  | -1.3289988 |
| C | 0.7532859  | 1.9487899  | -1.7436665 |
| C | 1.3421009  | 3.8792918  | -0.3619996 |
| C | 1.8366163  | 1.2413980  | -1.2072022 |
| C | 2.4239564  | 3.1615694  | 0.1676107  |
| C | 2.6769165  | 1.8430875  | -0.2532993 |
| C | -0.9350822 | 0.5043555  | 2.7740601  |
| C | -2.2459782 | 0.3288187  | 3.2885773  |
| C | -0.7413038 | 1.3318914  | 1.6381070  |
| C | -3.3345275 | 0.9698469  | 2.6813298  |
| C | -1.8384398 | 1.9683209  | 1.0409141  |
| C | -3.1339093 | 1.7920301  | 1.5575878  |
| C | 0.1689123  | -0.1495527 | 3.4100165  |
| C | 1.0908850  | -0.7167803 | 3.9812298  |
| C | -0.6114850 | 4.0114891  | -1.8681458 |
| C | -1.5673718 | 4.6385843  | -2.3073544 |
| H | 0.0877255  | 1.4733094  | -2.4672515 |
| H | 1.1399020  | 4.9035973  | -0.0369638 |
| H | 2.0201281  | 0.2135925  | -1.5264442 |
| H | 3.0711664  | 3.6344525  | 0.9129803  |
| H | -2.3934682 | -0.3084840 | 4.1649418  |
| H | 0.2618283  | 1.4652926  | 1.2267101  |
| H | -4.3411880 | 0.8253910  | 3.0861392  |

|   |            |            |            |
|---|------------|------------|------------|
| H | -1.6841991 | 2.5925816  | 0.1593153  |
| H | -3.9849001 | 2.2858775  | 1.0788592  |
| H | 1.9083740  | -1.2018151 | 4.4785564  |
| H | -2.3805529 | 5.2096916  | -2.7121457 |
| H | 3.5179669  | 1.2824327  | 0.1643722  |
| C | 3.5473311  | -1.6471361 | -0.1095671 |
| C | 2.4493079  | -1.4919848 | 0.7730963  |
| C | 3.3278181  | -2.2143483 | -1.3907737 |
| C | 1.1651562  | -1.8883131 | 0.3802691  |
| C | 2.0377122  | -2.6116507 | -1.7719828 |
| C | 0.9523092  | -2.4502832 | -0.8907111 |
| C | 4.8545864  | -1.2126970 | 0.2809769  |
| C | 5.9638064  | -0.8129760 | 0.6113540  |
| H | 2.6059562  | -1.0402520 | 1.7547409  |
| H | 4.1727010  | -2.3299100 | -2.0752991 |
| H | 0.3260252  | -1.7462253 | 1.0649834  |
| H | 1.8784150  | -3.0449697 | -2.7646526 |
| H | 6.9451225  | -0.4958780 | 0.9072957  |
| H | -0.0527634 | -2.7542390 | -1.1927586 |
| C | -2.6033909 | 1.0562073  | -2.4046352 |
| C | -2.5879701 | -0.0814802 | -1.9539300 |
| C | -2.5644364 | -1.4007447 | -1.3994110 |
| C | -2.4245340 | -1.5797579 | 0.0000930  |
| C | -2.6684260 | -2.5425494 | -2.2341748 |
| C | -2.3858593 | -2.8697371 | 0.5449955  |
| C | -2.6288698 | -3.8292218 | -1.6779509 |
| C | -2.4865823 | -3.9987046 | -0.2879999 |
| H | -2.5526722 | 2.0704703  | -2.7537832 |
| H | -2.3397297 | -0.7044889 | 0.6444464  |
| H | -2.7752618 | -2.4068328 | -3.3141036 |
| H | -2.2690541 | -2.9919250 | 1.6262552  |
| H | -2.7073242 | -4.7033264 | -2.3323714 |
| H | -2.4527854 | -5.0049313 | 0.1414776  |

-----  
Tetramer-06

|   |            |            |            |
|---|------------|------------|------------|
| C | 1.7444543  | -1.6668896 | -1.8769319 |
| C | 1.1853000  | -0.3672231 | -1.7958974 |
| C | 1.0004001  | -2.7020736 | -2.4979086 |
| C | -0.0911252 | -0.1148843 | -2.3130058 |
| C | -0.2778988 | -2.4387722 | -3.0121162 |
| C | -0.8292319 | -1.1469523 | -2.9188138 |
| C | -1.8401586 | -2.4506482 | 1.3839031  |
| C | -1.9346063 | -2.3966751 | 2.7981292  |
| C | -0.5862926 | -2.2203546 | 0.7654553  |
| C | -0.7987780 | -2.1076731 | 3.5678179  |
| C | 0.5466835  | -1.9501828 | 1.5437612  |
| C | 0.4441190  | -1.8860664 | 2.9445828  |
| C | -2.9982335 | -2.7142136 | 0.5846331  |
| C | -3.9864977 | -2.9113543 | -0.1095951 |
| C | 3.0356898  | -1.9178000 | -1.3130596 |

|   |            |            |            |
|---|------------|------------|------------|
| C | 4.1298151  | -2.0985949 | -0.7952424 |
| H | 1.7543327  | 0.4278470  | -1.3134624 |
| H | 1.4299369  | -3.7056811 | -2.5590996 |
| H | -0.5192596 | 0.8871510  | -2.2350365 |
| H | -0.8498520 | -3.2481835 | -3.4763818 |
| H | -2.9016899 | -2.5749113 | 3.2764313  |
| H | -0.5127976 | -2.2509739 | -0.3219410 |
| H | -0.8838385 | -2.0581854 | 4.6582913  |
| H | 1.5061165  | -1.7824956 | 1.0480778  |
| H | 1.3277663  | -1.6632809 | 3.5516587  |
| H | -4.8513920 | -3.1119739 | -0.7118885 |
| H | 5.1036668  | -2.2317418 | -0.3669337 |
| H | -1.8324986 | -0.9420283 | -3.3041622 |
| C | -2.8622047 | 2.0007363  | -0.7444554 |
| C | -2.5384461 | 0.8905187  | 0.0759518  |
| C | -2.9788265 | 3.2863422  | -0.1557873 |
| C | -2.3443746 | 1.0672271  | 1.4523823  |
| C | -2.7789903 | 3.4519064  | 1.2216260  |
| C | -2.4638316 | 2.3435770  | 2.0296793  |
| C | -3.0676994 | 1.8326865  | -2.1515378 |
| C | -3.2289847 | 1.6971209  | -3.3570741 |
| H | -2.4426107 | -0.1003841 | -0.3718581 |
| H | -3.2254150 | 4.1429166  | -0.7894787 |
| H | -2.0935062 | 0.2028869  | 2.0717622  |
| H | -2.8670125 | 4.4489110  | 1.6646164  |
| H | -3.3890627 | 1.5778909  | -4.4112564 |
| H | -2.3063762 | 2.4769910  | 3.1045998  |
| C | 6.0494659  | 0.8611875  | 0.7835191  |
| C | 4.8774880  | 1.1989298  | 0.6807618  |
| C | 3.5105182  | 1.6092776  | 0.5706453  |
| C | 2.5076162  | 0.9983891  | 1.3647478  |
| C | 3.1392402  | 2.6384506  | -0.3320854 |
| C | 1.1733598  | 1.4116766  | 1.2600757  |
| C | 1.8000163  | 3.0446498  | -0.4282672 |
| C | 0.8125537  | 2.4359853  | 0.3674167  |
| H | 7.0795742  | 0.5748772  | 0.8728524  |
| H | 2.7874613  | 0.1930386  | 2.0482388  |
| H | 3.9099629  | 3.1075971  | -0.9497862 |
| H | 0.4072537  | 0.9189253  | 1.8615725  |
| H | 1.5262601  | 3.8363814  | -1.1327676 |
| H | -0.2327811 | 2.7428358  | 0.2835192  |

-----  
Tetramer-07 (Te6)

|   |            |            |            |
|---|------------|------------|------------|
| C | -4.3681536 | -2.4912781 | -2.6381310 |
| C | -4.2841450 | -1.5935868 | -1.8099823 |
| C | -4.1524202 | -0.5318998 | -0.8579758 |
| C | -3.3718549 | -0.7114367 | 0.3112004  |
| C | -4.7774266 | 0.7203642  | -1.0878017 |
| C | -3.2210636 | 0.3388477  | 1.2261804  |
| C | -4.6165702 | 1.7661439  | -0.1677826 |

|   |            |            |            |
|---|------------|------------|------------|
| C | -3.8384366 | 1.5792070  | 0.9895255  |
| H | -4.4669466 | -3.2854415 | -3.3527220 |
| H | -2.8713484 | -1.6678233 | 0.4797149  |
| H | -5.3752258 | 0.8619593  | -1.9925115 |
| H | -2.6054104 | 0.1930070  | 2.1169540  |
| H | -5.0939520 | 2.7324715  | -0.3589531 |
| H | -3.7040659 | 2.4025099  | 1.6978790  |
| C | -0.5165301 | -3.7785671 | 0.5270340  |
| C | -0.4066026 | -2.7569550 | 1.1919424  |
| C | -0.2949780 | -1.5474585 | 1.9501510  |
| C | -0.6326075 | -1.5240835 | 3.3273583  |
| C | 0.1369714  | -0.3541389 | 1.3219352  |
| C | -0.5369400 | -0.3284033 | 4.0534862  |
| C | 0.2325815  | 0.8346940  | 2.0564473  |
| C | -0.1033804 | 0.8527482  | 3.4213519  |
| H | -0.6172701 | -4.6754956 | -0.0528441 |
| H | -0.9713298 | -2.4437854 | 3.8123535  |
| H | 0.3911459  | -0.3711391 | 0.2631000  |
| H | -0.8022389 | -0.3182328 | 5.1154206  |
| H | 0.5552241  | 1.7513234  | 1.5566898  |
| H | -0.0326109 | 1.7844157  | 3.9915056  |
| C | -0.3656782 | 4.2962443  | -0.0594852 |
| C | -0.2019877 | 3.2328868  | -0.6439127 |
| C | -0.0016455 | 1.9683231  | -1.2857872 |
| C | -1.1119084 | 1.1648243  | -1.6483328 |
| C | 1.3116183  | 1.4914586  | -1.5299223 |
| C | -0.9085293 | -0.0861969 | -2.2463945 |
| C | 1.5033122  | 0.2365138  | -2.1241985 |
| C | 0.3967056  | -0.5529436 | -2.4852528 |
| H | -0.5104291 | 5.2457675  | 0.4184041  |
| H | -2.1229600 | 1.5166191  | -1.4336947 |
| H | 2.1700381  | 2.0970259  | -1.2280034 |
| H | -1.7707655 | -0.7056968 | -2.5071838 |
| H | 2.5186282  | -0.1360333 | -2.2795067 |
| H | 0.5524299  | -1.5378228 | -2.9361399 |
| C | 4.8088932  | 2.8164987  | 0.4387735  |
| C | 4.6350380  | 1.6290243  | 0.1980670  |
| C | 4.3888489  | 0.2525223  | -0.1092256 |
| C | 3.4405146  | -0.4873638 | 0.6394647  |
| C | 5.0611372  | -0.3772275 | -1.1875152 |
| C | 3.1578873  | -1.8179445 | 0.3052807  |
| C | 4.7776890  | -1.7120537 | -1.5098380 |
| C | 3.8234482  | -2.4341396 | -0.7690425 |
| H | 4.9811940  | 3.8513861  | 0.6637997  |
| H | 2.9104125  | -0.0023418 | 1.4617793  |
| H | 5.7922768  | 0.1925090  | -1.7679979 |
| H | 2.4013979  | -2.3698416 | 0.8702866  |
| H | 5.2989952  | -2.1887359 | -2.3463916 |
| H | 3.5968648  | -3.4724744 | -1.0313312 |

---

Tetramer-08 (Te7)

|   |            |            |            |
|---|------------|------------|------------|
| C | 0.4189523  | -2.8609589 | -1.4637117 |
| C | -0.7598468 | -2.5625335 | -1.3223463 |
| C | -2.1200521 | -2.1570336 | -1.1384164 |
| C | -2.5738715 | -1.7604450 | 0.1439445  |
| C | -3.0188395 | -2.1119213 | -2.2337548 |
| C | -3.8931046 | -1.3241104 | 0.3220310  |
| C | -4.3389307 | -1.6779877 | -2.0451364 |
| C | -4.7809379 | -1.2819925 | -0.7685277 |
| H | 1.4549895  | -3.1321459 | -1.5596074 |
| H | -1.8800371 | -1.7850925 | 0.9843307  |
| H | -2.6692169 | -2.4137677 | -3.2251861 |
| H | -4.2219091 | -1.0005945 | 1.3142641  |
| H | -5.0237757 | -1.6440611 | -2.8984923 |
| H | -5.8111558 | -0.9389996 | -0.6273856 |
| C | 2.3441986  | 4.6465798  | -1.2180054 |
| C | 1.3632381  | 3.9176458  | -1.2939952 |
| C | 0.2227786  | 3.0560463  | -1.3783287 |
| C | 0.3353371  | 1.7688627  | -1.9628536 |
| C | -1.0356919 | 3.4761823  | -0.8765204 |
| C | -0.7802361 | 0.9252343  | -2.0335685 |
| C | -2.1456484 | 2.6231281  | -0.9537264 |
| C | -2.0225619 | 1.3452017  | -1.5268823 |
| H | 3.1953633  | 5.2978755  | -1.1682072 |
| H | 1.3030028  | 1.4391241  | -2.3478066 |
| H | -1.1243640 | 4.4670941  | -0.4229733 |
| H | -0.6731936 | -0.0732566 | -2.4633855 |
| H | -3.1051797 | 2.9490664  | -0.5422563 |
| H | -2.8818265 | 0.6713934  | -1.5611819 |
| C | -3.2331953 | 2.3542394  | 2.8304962  |
| C | -2.3592841 | 1.5076408  | 2.6961171  |
| C | -1.3543169 | 0.4989594  | 2.5447731  |
| C | -1.3267587 | -0.6154151 | 3.4213325  |
| C | -0.3842978 | 0.5924917  | 1.5148858  |
| C | -0.3583781 | -1.6169171 | 3.2568518  |
| C | 0.5788546  | -0.4119041 | 1.3614002  |
| C | 0.5941784  | -1.5196899 | 2.2259942  |
| H | -3.9770064 | 3.1144628  | 2.9702486  |
| H | -2.0693167 | -0.6842665 | 4.2214180  |
| H | -0.4047103 | 1.4460658  | 0.8371894  |
| H | -0.3515936 | -2.4769648 | 3.9339810  |
| H | 1.3150078  | -0.3335236 | 0.5597220  |
| H | 1.3434748  | -2.3047012 | 2.0897665  |
| C | 4.0493267  | -3.7044552 | -1.4856611 |
| C | 3.9842278  | -2.6145916 | -0.9310795 |
| C | 3.9026316  | -1.3393840 | -0.2851262 |
| C | 3.6109236  | -0.1705940 | -1.0337935 |
| C | 4.1206990  | -1.2271274 | 1.1113013  |
| C | 3.5459967  | 1.0771643  | -0.3985304 |
| C | 4.0515691  | 0.0246245  | 1.7374159  |

|   |           |            |            |
|---|-----------|------------|------------|
| C | 3.7660605 | 1.1787311  | 0.9865538  |
| H | 4.1268542 | -4.6583296 | -1.9709753 |
| H | 3.4380482 | -0.2573772 | -2.1100394 |
| H | 4.3401003 | -2.1284906 | 1.6904099  |
| H | 3.3106981 | 1.9749401  | -0.9761573 |
| H | 4.2113062 | 0.0970642  | 2.8174664  |
| H | 3.7008828 | 2.1540703  | 1.4783645  |

-----  
Tetramer-09

|   |            |            |            |
|---|------------|------------|------------|
| C | 0.2185305  | -2.7953412 | -1.3749194 |
| C | -0.0355854 | -1.4561605 | -1.7638354 |
| C | -0.8605108 | -3.6046476 | -0.9359939 |
| C | -1.3353690 | -0.9391062 | -1.7008371 |
| C | -2.1593868 | -3.0780161 | -0.8856142 |
| C | -2.4015257 | -1.7442937 | -1.2625232 |
| C | -1.0038091 | -0.4652804 | 2.8529520  |
| C | -0.3746565 | 0.5674592  | 3.5944012  |
| C | -0.3026724 | -1.0724343 | 1.7818127  |
| C | 0.9249600  | 0.9794148  | 3.2657320  |
| C | 0.9982416  | -0.6581523 | 1.4694732  |
| C | 1.6177691  | 0.3675912  | 2.2040101  |
| C | -2.3408324 | -0.8706327 | 3.1667941  |
| C | -3.4966896 | -1.1909948 | 3.4121909  |
| C | 1.5499462  | -3.3216403 | -1.4105569 |
| C | 2.6893246  | -3.7700666 | -1.4242205 |
| H | 0.7892560  | -0.8209829 | -2.0945645 |
| H | -0.6648084 | -4.6367818 | -0.6327253 |
| H | -1.5143425 | 0.1028046  | -1.9751819 |
| H | -2.9837518 | -3.7089561 | -0.5386849 |
| H | -0.9183437 | 1.0409730  | 4.4166346  |
| H | -0.7892476 | -1.8502435 | 1.1906572  |
| H | 1.3970583  | 1.7831594  | 3.8399602  |
| H | 1.5275424  | -1.1318585 | 0.6405189  |
| H | 2.6298429  | 0.6893314  | 1.9448443  |
| H | -4.5018292 | -1.4865197 | 3.6422213  |
| H | 3.6798640  | -4.1796132 | -1.4687398 |
| H | -3.4107811 | -1.3270808 | -1.1984147 |
| C | -3.5550202 | 1.6398856  | -0.7342447 |
| C | -2.6587651 | 1.4466263  | 0.3463391  |
| C | -3.1291476 | 2.3887007  | -1.8613103 |
| C | -1.3649977 | 1.9825007  | 0.2940029  |
| C | -1.8336738 | 2.9236267  | -1.9006462 |
| C | -0.9478154 | 2.7218651  | -0.8259847 |
| C | -4.8641643 | 1.0604696  | -0.7026651 |
| C | -5.9712551 | 0.5378919  | -0.6886400 |
| H | -2.9782400 | 0.8535622  | 1.2059140  |
| H | -3.8193603 | 2.5359875  | -2.6967157 |
| H | -0.6747102 | 1.8011878  | 1.1206397  |
| H | -1.5131854 | 3.4965015  | -2.7772994 |
| H | -6.9548297 | 0.1102356  | -0.6627345 |

|   |           |            |            |
|---|-----------|------------|------------|
| H | 0.0699340 | 3.1186680  | -0.8738230 |
| C | 1.6421132 | 1.7036559  | -2.9476821 |
| C | 2.4518424 | 1.4406845  | -2.0687531 |
| C | 3.3921845 | 1.1274233  | -1.0361784 |
| C | 3.7151935 | -0.2217218 | -0.7455535 |
| C | 4.0123721 | 2.1623705  | -0.2912629 |
| C | 4.6358339 | -0.5222098 | 0.2673428  |
| C | 4.9346485 | 1.8507706  | 0.7175031  |
| C | 5.2510057 | 0.5090536  | 1.0005250  |
| H | 0.9243022 | 1.9258808  | -3.7127395 |
| H | 3.2342221 | -1.0280511 | -1.3047750 |
| H | 3.7654141 | 3.2039234  | -0.5152687 |
| H | 4.8678432 | -1.5685301 | 0.4891493  |
| H | 5.4062463 | 2.6583953  | 1.2865169  |
| H | 5.9688777 | 0.2695113  | 1.7912699  |

---

Tetramer-10

|   |            |            |            |
|---|------------|------------|------------|
| C | -1.0501483 | 4.7106825  | 0.2390650  |
| C | -0.8912491 | 3.7188700  | -0.4607987 |
| C | -0.7300237 | 2.5397555  | -1.2576589 |
| C | -0.1051382 | 1.3923952  | -0.7112755 |
| C | -1.2131495 | 2.4963506  | -2.5909342 |
| C | 0.0298184  | 0.2286856  | -1.4784622 |
| C | -1.0743574 | 1.3259415  | -3.3504934 |
| C | -0.4543889 | 0.1897755  | -2.7968378 |
| H | -1.1731628 | 5.5915366  | 0.8390695  |
| H | 0.2515916  | 1.4174055  | 0.3190726  |
| H | -1.6997637 | 3.3797158  | -3.0135316 |
| H | 0.5058851  | -0.6501906 | -1.0415837 |
| H | -1.4570699 | 1.2986670  | -4.3756805 |
| H | -0.3600186 | -0.7261591 | -3.3876755 |
| C | 0.2299213  | 1.2720332  | 3.4005903  |
| C | 0.2816863  | 0.2522054  | 2.7256353  |
| C | 0.3375695  | -0.9067756 | 1.8860967  |
| C | 1.5855678  | -1.3997230 | 1.4298857  |
| C | -0.8568302 | -1.5441704 | 1.4672551  |
| C | 1.6325416  | -2.5101367 | 0.5755735  |
| C | -0.7996274 | -2.6508043 | 0.6100949  |
| C | 0.4424635  | -3.1388870 | 0.1644748  |
| H | 0.1821934  | 2.1505994  | 4.0139728  |
| H | 2.5045680  | -0.8927389 | 1.7291313  |
| H | -1.8186445 | -1.1508655 | 1.7992309  |
| H | 2.5992129  | -2.8665474 | 0.2090310  |
| H | -1.7294745 | -3.1139004 | 0.2685723  |
| H | 0.4829244  | -3.9965711 | -0.5147336 |
| C | -3.7328604 | -2.6944109 | -2.3333522 |
| C | -3.8120489 | -1.9213922 | -1.3874652 |
| C | -3.8734994 | -1.0347980 | -0.2648076 |
| C | -3.3138893 | 0.2643972  | -0.3444264 |
| C | -4.4720918 | -1.4578197 | 0.9494147  |



|   |            |            |            |
|---|------------|------------|------------|
| C | -3.3424398 | 1.1137329  | 0.7697466  |
| C | -4.4992459 | -0.5992009 | 2.0574017  |
| C | -3.9327178 | 0.6863159  | 1.9721825  |
| H | -3.6934712 | -3.3600367 | -3.1738066 |
| H | -2.8445014 | 0.5892079  | -1.2744360 |
| H | -4.9020528 | -2.4614074 | 1.0131094  |
| H | -2.8876446 | 2.1059253  | 0.7018233  |
| H | -4.9577403 | -0.9364963 | 2.9923357  |
| H | -3.9414634 | 1.3477722  | 2.8440420  |
| C | 4.4563810  | -2.2955307 | -2.4261530 |
| C | 4.3826384  | -1.4127295 | -1.5814095 |
| C | 4.2693315  | -0.4006329 | -0.5751749 |
| C | 3.3707210  | 0.6818567  | -0.7444775 |
| C | 5.0347888  | -0.4826447 | 0.6155751  |
| C | 3.2342955  | 1.6500291  | 0.2588808  |
| C | 4.8929605  | 0.4926735  | 1.6128999  |
| C | 3.9910617  | 1.5589161  | 1.4401591  |
| H | 4.5442562  | -3.0524244 | -3.1815964 |
| H | 2.7684878  | 0.7423905  | -1.6534841 |
| H | 5.7272483  | -1.3184646 | 0.7497169  |
| H | 2.5230399  | 2.4694385  | 0.1224401  |
| H | 5.4831930  | 0.4169889  | 2.5315987  |
| H | 3.8711179  | 2.3089346  | 2.2277267  |

-----  
Tetramer-11 (Te8)

|   |            |            |            |
|---|------------|------------|------------|
| C | -0.0837048 | -3.8871770 | 0.9816091  |
| C | -0.9902132 | -3.2621942 | 0.4471238  |
| C | -2.0851992 | -2.5704273 | -0.1643923 |
| C | -2.6004967 | -1.3831210 | 0.4121596  |
| C | -2.6771309 | -3.0811737 | -1.3476272 |
| C | -3.6956718 | -0.7349985 | -0.1750365 |
| C | -3.7709732 | -2.4240495 | -1.9281961 |
| C | -4.2863203 | -1.2528800 | -1.3414533 |
| H | 0.7254942  | -4.4179859 | 1.4444604  |
| H | -2.1357850 | -0.9762591 | 1.3119780  |
| H | -2.2769831 | -3.9960835 | -1.7937034 |
| H | -4.0772458 | 0.1873359  | 0.2699198  |
| H | -4.2240246 | -2.8297846 | -2.8382894 |
| H | -5.1399902 | -0.7412453 | -1.7976199 |
| C | 3.1882346  | 3.7825166  | -1.7549575 |
| C | 2.2587422  | 2.9953461  | -1.8772570 |
| C | 1.1642997  | 2.0826635  | -2.0180688 |
| C | 1.2979346  | 0.7300316  | -1.6152989 |
| C | -0.0728224 | 2.5237363  | -2.5555109 |
| C | 0.2158067  | -0.1506206 | -1.7394911 |
| C | -1.1462949 | 1.6303041  | -2.6795348 |
| C | -1.0072112 | 0.2916529  | -2.2710484 |
| H | 4.0022377  | 4.4739461  | -1.6542343 |
| H | 2.2464125  | 0.3855440  | -1.1986136 |
| H | -0.1777746 | 3.5677664  | -2.8631981 |

|   |            |            |            |
|---|------------|------------|------------|
| H | 0.3212126  | -1.1835557 | -1.4002144 |
| H | -2.0999593 | 1.9853718  | -3.0822683 |
| H | -1.8507879 | -0.3980897 | -2.3479298 |
| C | -4.0807034 | 3.2857175  | 0.4335822  |
| C | -3.1953092 | 2.6554573  | 0.9972306  |
| C | -2.1788805 | 1.8918372  | 1.6563329  |
| C | -2.4404012 | 1.2949371  | 2.9162464  |
| C | -0.9087101 | 1.7104278  | 1.0549100  |
| C | -1.4489394 | 0.5378681  | 3.5565755  |
| C | 0.0784458  | 0.9629904  | 1.7100077  |
| C | -0.1848045 | 0.3752215  | 2.9591328  |
| H | -4.8422240 | 3.8715822  | -0.0437311 |
| H | -3.4228678 | 1.4297265  | 3.3773999  |
| H | -0.7098919 | 2.1449947  | 0.0739756  |
| H | -1.6640297 | 0.0758077  | 4.5253024  |
| H | 1.0567100  | 0.8366973  | 1.2421898  |
| H | 0.5953417  | -0.2038163 | 3.4617605  |
| C | 3.4295565  | 0.6291337  | 3.3714388  |
| C | 3.5062115  | 0.0273094  | 2.3087322  |
| C | 3.5908001  | -0.6746391 | 1.0642534  |
| C | 4.6454755  | -0.4025645 | 0.1560844  |
| C | 2.6162404  | -1.6452667 | 0.7193648  |
| C | 4.7217782  | -1.0912872 | -1.0624391 |
| C | 2.7069422  | -2.3340880 | -0.4975267 |
| C | 3.7564494  | -2.0604527 | -1.3924164 |
| H | 3.3585130  | 1.1603926  | 4.3006857  |
| H | 5.3916270  | 0.3531303  | 0.4157529  |
| H | 1.7840396  | -1.8396610 | 1.3997167  |
| H | 5.5352791  | -0.8667568 | -1.7592655 |
| H | 1.9405791  | -3.0725130 | -0.7493655 |
| H | 3.8172299  | -2.5917355 | -2.3473625 |

-----  
Tetramer-12

|   |            |            |            |
|---|------------|------------|------------|
| C | -0.0837048 | -3.8871770 | 0.9816091  |
| C | -0.9902132 | -3.2621942 | 0.4471238  |
| C | -2.0851992 | -2.5704273 | -0.1643923 |
| C | -2.6004967 | -1.3831210 | 0.4121596  |
| C | -2.6771309 | -3.0811737 | -1.3476272 |
| C | -3.6956718 | -0.7349985 | -0.1750365 |
| C | -3.7709732 | -2.4240495 | -1.9281961 |
| C | -4.2863203 | -1.2528800 | -1.3414533 |
| H | 0.7254942  | -4.4179859 | 1.4444604  |
| H | -2.1357850 | -0.9762591 | 1.3119780  |
| H | -2.2769831 | -3.9960835 | -1.7937034 |
| H | -4.0772458 | 0.1873359  | 0.2699198  |
| H | -4.2240246 | -2.8297846 | -2.8382894 |
| H | -5.1399902 | -0.7412453 | -1.7976199 |
| C | 3.1882346  | 3.7825166  | -1.7549575 |
| C | 2.2587422  | 2.9953461  | -1.8772570 |
| C | 1.1642997  | 2.0826635  | -2.0180688 |

|   |            |            |            |
|---|------------|------------|------------|
| C | 1.2979346  | 0.7300316  | -1.6152989 |
| C | -0.0728224 | 2.5237363  | -2.5555109 |
| C | 0.2158067  | -0.1506206 | -1.7394911 |
| C | -1.1462949 | 1.6303041  | -2.6795348 |
| C | -1.0072112 | 0.2916529  | -2.2710484 |
| H | 4.0022377  | 4.4739461  | -1.6542343 |
| H | 2.2464125  | 0.3855440  | -1.1986136 |
| H | -0.1777746 | 3.5677664  | -2.8631981 |
| H | 0.3212126  | -1.1835557 | -1.4002144 |
| H | -2.0999593 | 1.9853718  | -3.0822683 |
| H | -1.8507879 | -0.3980897 | -2.3479298 |
| C | -4.0807034 | 3.2857175  | 0.4335822  |
| C | -3.1953092 | 2.6554573  | 0.9972306  |
| C | -2.1788805 | 1.8918372  | 1.6563329  |
| C | -2.4404012 | 1.2949371  | 2.9162464  |
| C | -0.9087101 | 1.7104278  | 1.0549100  |
| C | -1.4489394 | 0.5378681  | 3.5565755  |
| C | 0.0784458  | 0.9629904  | 1.7100077  |
| C | -0.1848045 | 0.3752215  | 2.9591328  |
| H | -4.8422240 | 3.8715822  | -0.0437311 |
| H | -3.4228678 | 1.4297265  | 3.3773999  |
| H | -0.7098919 | 2.1449947  | 0.0739756  |
| H | -1.6640297 | 0.0758077  | 4.5253024  |
| H | 1.0567100  | 0.8366973  | 1.2421898  |
| H | 0.5953417  | -0.2038163 | 3.4617605  |
| C | 3.4295565  | 0.6291337  | 3.3714388  |
| C | 3.5062115  | 0.0273094  | 2.3087322  |
| C | 3.5908001  | -0.6746391 | 1.0642534  |
| C | 4.6454755  | -0.4025645 | 0.1560844  |
| C | 2.6162404  | -1.6452667 | 0.7193648  |
| C | 4.7217782  | -1.0912872 | -1.0624391 |
| C | 2.7069422  | -2.3340880 | -0.4975267 |
| C | 3.7564494  | -2.0604527 | -1.3924164 |
| H | 3.3585130  | 1.1603926  | 4.3006857  |
| H | 5.3916270  | 0.3531303  | 0.4157529  |
| H | 1.7840396  | -1.8396610 | 1.3997167  |
| H | 5.5352791  | -0.8667568 | -1.7592655 |
| H | 1.9405791  | -3.0725130 | -0.7493655 |
| H | 3.8172299  | -2.5917355 | -2.3473625 |

-----  
Tetramer-13

|   |            |            |            |
|---|------------|------------|------------|
| C | -4.9857239 | 1.3491708  | 2.6215490  |
| C | -4.6259983 | 1.0081188  | 1.5022103  |
| C | -4.1865365 | 0.5862739  | 0.2060688  |
| C | -3.0380669 | 1.1678392  | -0.3866134 |
| C | -4.8819750 | -0.4364831 | -0.4877592 |
| C | -2.5983474 | 0.7339921  | -1.6443378 |
| C | -4.4349963 | -0.8615664 | -1.7467445 |
| C | -3.2940833 | -0.2780206 | -2.3284664 |
| H | -5.3237505 | 1.6702618  | 3.5876919  |

|   |            |            |            |
|---|------------|------------|------------|
| H | -2.4859905 | 1.9375744  | 0.1572297  |
| H | -5.7623434 | -0.8916855 | -0.0257917 |
| H | -1.6981610 | 1.1733295  | -2.0799121 |
| H | -4.9746673 | -1.6566833 | -2.2709986 |
| H | -2.9405994 | -0.6218819 | -3.3054889 |
| C | -0.2269616 | 3.2130828  | 1.9859642  |
| C | 0.0922435  | 2.6768535  | 0.9333326  |
| C | 0.4330443  | 2.0529601  | -0.3090146 |
| C | 0.5272851  | 2.8264449  | -1.4931502 |
| C | 0.6610041  | 0.6576734  | -0.3712782 |
| C | 0.8431712  | 2.2097452  | -2.7118836 |
| C | 0.9822130  | 0.0517044  | -1.5917258 |
| C | 1.0735057  | 0.8221220  | -2.7640612 |
| H | -0.5100212 | 3.6849397  | 2.9067740  |
| H | 0.3452541  | 3.9033189  | -1.4441578 |
| H | 0.5862757  | 0.0638086  | 0.5386529  |
| H | 0.9051367  | 2.8136948  | -3.6227266 |
| H | 1.1552437  | -1.0259009 | -1.6276599 |
| H | 1.3226862  | 0.3443093  | -3.7168552 |
| C | -0.3795542 | -3.7387586 | -2.0743950 |
| C | -0.4233111 | -3.2000774 | -0.9759794 |
| C | -0.4556188 | -2.5548082 | 0.3016682  |
| C | -1.5864771 | -1.7966589 | 0.6948857  |
| C | 0.6542438  | -2.6524769 | 1.1782074  |
| C | -1.6070187 | -1.1574786 | 1.9419230  |
| C | 0.6182975  | -2.0162286 | 2.4263806  |
| C | -0.5092169 | -1.2690650 | 2.8134493  |
| H | -0.3564468 | -4.2421510 | -3.0211814 |
| H | -2.4296415 | -1.6978916 | 0.0097424  |
| H | 1.5419946  | -3.2054546 | 0.8624300  |
| H | -2.4771590 | -0.5593933 | 2.2249959  |
| H | 1.4775966  | -2.1008139 | 3.0985028  |
| H | -0.5290282 | -0.7689579 | 3.7867711  |
| C | 4.1673651  | -3.0892150 | -0.3162981 |
| C | 4.0870026  | -1.8933369 | -0.0663051 |
| C | 3.9685390  | -0.4952460 | 0.2166140  |
| C | 3.5646840  | -0.0529062 | 1.5005555  |
| C | 4.2339076  | 0.4658994  | -0.7902943 |
| C | 3.4185224  | 1.3151842  | 1.7629511  |
| C | 4.0866442  | 1.8319850  | -0.5179391 |
| C | 3.6755305  | 2.2613795  | 0.7555649  |
| H | 4.2608507  | -4.1359889 | -0.5314478 |
| H | 3.3544667  | -0.7922831 | 2.2763446  |
| H | 4.5401969  | 0.1267766  | -1.7832974 |
| H | 3.0861784  | 1.6448202  | 2.7518052  |
| H | 4.2762419  | 2.5631515  | -1.3095839 |
| H | 3.5386043  | 3.3275597  | 0.9591372  |

-----  
Tetramer-14

|   |            |            |            |
|---|------------|------------|------------|
| C | -2.7720918 | -1.2493285 | -1.8148923 |
|---|------------|------------|------------|

|   |            |            |            |
|---|------------|------------|------------|
| C | -1.4266908 | -0.9893788 | -1.4528231 |
| C | -3.6808664 | -0.1664371 | -1.9071322 |
| C | -1.0007944 | 0.3184539  | -1.1881224 |
| C | -3.2479029 | 1.1392530  | -1.6361562 |
| C | -1.9114414 | 1.3867794  | -1.2758463 |
| C | -1.9201409 | -0.0011447 | 2.1207124  |
| C | -0.7434005 | -0.7546089 | 2.3594663  |
| C | -3.0926877 | -0.6727955 | 1.6940108  |
| C | -0.7462306 | -2.1447304 | 2.1786250  |
| C | -3.0835947 | -2.0609525 | 1.5070574  |
| C | -1.9134459 | -2.8018792 | 1.7493379  |
| C | -1.9215218 | 1.4207203  | 2.2868384  |
| C | -1.9264066 | 2.6375207  | 2.4168247  |
| C | -3.2091549 | -2.5904787 | -2.0641890 |
| C | -3.5842461 | -3.7395895 | -2.2580612 |
| H | -0.7399042 | -1.8334459 | -1.3682797 |
| H | -4.7200474 | -0.3637441 | -2.1856529 |
| H | 0.0365571  | 0.5115217  | -0.9006468 |
| H | -3.9594843 | 1.9688794  | -1.7020517 |
| H | 0.1700796  | -0.2442108 | 2.6745397  |
| H | -3.9956717 | -0.0913972 | 1.4924119  |
| H | 0.1723781  | -2.7084441 | 2.3663846  |
| H | -3.9864986 | -2.5657244 | 1.1509629  |
| H | -1.9107939 | -3.8855112 | 1.5958984  |
| H | -1.9049372 | 3.7084167  | 2.4754979  |
| H | -3.9106032 | -4.7437265 | -2.4509423 |
| H | -1.5859845 | 2.4043910  | -1.0495518 |
| C | 0.8790895  | 3.5213110  | -0.2802355 |
| C | 1.2855586  | 2.6959276  | 0.7984436  |
| C | 1.4571915  | 3.3197863  | -1.5592224 |
| C | 2.2523060  | 1.7009292  | 0.5990132  |
| C | 2.4229936  | 2.3211680  | -1.7474870 |
| C | 2.8258460  | 1.5109616  | -0.6711800 |
| C | -0.1095689 | 4.5405994  | -0.0900751 |
| C | -0.9630502 | 5.4068216  | 0.0545447  |
| H | 0.8227342  | 2.8333105  | 1.7778616  |
| H | 1.1380211  | 3.9498872  | -2.3940379 |
| H | 2.5524603  | 1.0596439  | 1.4326892  |
| H | 2.8605629  | 2.1720966  | -2.7398564 |
| H | -1.6981698 | 6.1784350  | 0.1794800  |
| H | 3.5687718  | 0.7237001  | -0.8235703 |
| C | 2.7571813  | -1.5519124 | 3.2411779  |
| C | 2.9287364  | -1.6711573 | 2.0350604  |
| C | 3.1313680  | -1.7813952 | 0.6214650  |
| C | 4.4436618  | -1.8687938 | 0.0913220  |
| C | 2.0257670  | -1.7811328 | -0.2655620 |
| C | 4.6400934  | -1.9552643 | -1.2942199 |
| C | 2.2331112  | -1.8683466 | -1.6485664 |
| C | 3.5369441  | -1.9564370 | -2.1677471 |
| H | 2.5994481  | -1.4687733 | 4.2993931  |

|   |           |            |            |
|---|-----------|------------|------------|
| H | 5.2974376 | -1.8642069 | 0.7745029  |
| H | 1.0173938 | -1.6961462 | 0.1441847  |
| H | 5.6571879 | -2.0216411 | -1.6939114 |
| H | 1.3763342 | -1.8536183 | -2.3279838 |
| H | 3.6946821 | -2.0220538 | -3.2488267 |

-----  
Tetramer-15 (Te9)

|   |            |            |            |
|---|------------|------------|------------|
| C | 1.0760508  | -2.0041075 | 1.8872553  |
| C | 0.0485357  | -1.4014925 | 2.1670994  |
| C | -1.1431915 | -0.6514916 | 2.4213415  |
| C | -1.1536736 | 0.3784717  | 3.3954778  |
| C | -2.3154809 | -0.8971037 | 1.6639652  |
| C | -2.3087737 | 1.1472950  | 3.5977531  |
| C | -3.4648026 | -0.1245683 | 1.8749225  |
| C | -3.4680763 | 0.8996374  | 2.8390274  |
| H | 1.9786587  | -2.5169560 | 1.6127656  |
| H | -0.2492693 | 0.5701090  | 3.9799226  |
| H | -2.3056602 | -1.6753806 | 0.9001735  |
| H | -2.3024664 | 1.9459929  | 4.3463481  |
| H | -4.3542405 | -0.3126637 | 1.2664326  |
| H | -4.3645737 | 1.5084643  | 2.9932235  |
| C | 1.5393602  | -2.4681696 | -1.6843629 |
| C | 0.3215562  | -2.3521298 | -1.6514110 |
| C | -1.1014980 | -2.2096476 | -1.6070681 |
| C | -1.7035039 | -0.9591265 | -1.8925469 |
| C | -1.9271164 | -3.3081717 | -1.2563609 |
| C | -3.0949019 | -0.8102730 | -1.8206694 |
| C | -3.3195372 | -3.1524106 | -1.1951318 |
| C | -3.9081174 | -1.9045423 | -1.4753633 |
| H | 2.6074301  | -2.5524557 | -1.6271736 |
| H | -1.0701233 | -0.1121259 | -2.1561608 |
| H | -1.4643708 | -4.2726700 | -1.0297202 |
| H | -3.5398144 | 0.1692811  | -2.0200732 |
| H | -3.9469916 | -4.0076798 | -0.9245458 |
| H | -4.9954954 | -1.7872281 | -1.4205693 |
| C | -4.0450494 | 3.3748990  | -1.0784803 |
| C | -2.8894338 | 2.9711175  | -1.1030220 |
| C | -1.5453381 | 2.4789728  | -1.1493882 |
| C | -0.9703475 | 1.8472095  | -0.0183274 |
| C | -0.7797916 | 2.6010504  | -2.3370778 |
| C | 0.3347106  | 1.3429040  | -0.0833217 |
| C | 0.5252698  | 2.0889652  | -2.3899966 |
| C | 1.0861634  | 1.4565776  | -1.2655122 |
| H | -5.0441874 | 3.7642331  | -1.0472901 |
| H | -1.5607702 | 1.7399073  | 0.8932188  |
| H | -1.2226779 | 3.0902101  | -3.2091819 |
| H | 0.7638513  | 0.8379042  | 0.7838665  |
| H | 1.1020478  | 2.1773772  | -3.3161386 |
| H | 2.0988003  | 1.0482369  | -1.3088077 |
| C | 4.4420584  | -3.0592041 | 0.4575280  |

|   |           |            |            |
|---|-----------|------------|------------|
| C | 4.3816664 | -1.8384534 | 0.3823713  |
| C | 4.3210656 | -0.4106024 | 0.2928621  |
| C | 3.6493334 | 0.3462537  | 1.2855071  |
| C | 4.9498405 | 0.2647125  | -0.7842308 |
| C | 3.6205900 | 1.7445554  | 1.2034662  |
| C | 4.9139640 | 1.6642740  | -0.8557030 |
| C | 4.2525866 | 2.4086984  | 0.1376776  |
| H | 4.5000218 | -4.1285523 | 0.5255949  |
| H | 3.1465777 | -0.1722616 | 2.1052725  |
| H | 5.4671940 | -0.3181879 | -1.5515134 |
| H | 3.0919524 | 2.3184128  | 1.9704452  |
| H | 5.4035336 | 2.1751126  | -1.6909175 |
| H | 4.2218765 | 3.5008647  | 0.0757990  |

---

Tetramer-16

|   |            |            |            |
|---|------------|------------|------------|
| C | 1.4392881  | -2.3961796 | 0.9013369  |
| C | 0.2807233  | -2.1936399 | 1.2390857  |
| C | -1.0723508 | -1.9288990 | 1.6237127  |
| C | -1.3911703 | -1.6284233 | 2.9725441  |
| C | -2.1072191 | -1.9370553 | 0.6550767  |
| C | -2.7139092 | -1.3389302 | 3.3373199  |
| C | -3.4250869 | -1.6459745 | 1.0303455  |
| C | -3.7344103 | -1.3453404 | 2.3686448  |
| H | 2.4587027  | -2.5653375 | 0.6059759  |
| H | -0.5930231 | -1.6171000 | 3.7202809  |
| H | -1.8640891 | -2.1490988 | -0.3864042 |
| H | -2.9496888 | -1.1008839 | 4.3794518  |
| H | -4.2104980 | -1.6337224 | 0.2689709  |
| H | -4.7621949 | -1.1023184 | 2.6541653  |
| C | 2.0775075  | 0.0505432  | -1.9317942 |
| C | 0.9393981  | -0.3268955 | -2.1733131 |
| C | -0.3958256 | -0.7752292 | -2.4307952 |
| C | -1.4956093 | 0.1054990  | -2.2711884 |
| C | -0.6372306 | -2.1142198 | -2.8323417 |
| C | -2.8015946 | -0.3478157 | -2.5006356 |
| C | -1.9473010 | -2.5555919 | -3.0672218 |
| C | -3.0333231 | -1.6757894 | -2.9010464 |
| H | 3.0687807  | 0.3806609  | -1.6858419 |
| H | -1.3159050 | 1.1339633  | -1.9559917 |
| H | 0.2089081  | -2.7973283 | -2.9461435 |
| H | -3.6424939 | 0.3371250  | -2.3539716 |
| H | -2.1237384 | -3.5912917 | -3.3744918 |
| H | -4.0548827 | -2.0269795 | -3.0783525 |
| C | -5.1145762 | 2.2933046  | 0.9329426  |
| C | -3.9153473 | 2.3568762  | 0.6950302  |
| C | -2.5155439 | 2.4350965  | 0.4017082  |
| C | -1.6108293 | 1.4925758  | 0.9521462  |
| C | -2.0209501 | 3.4520146  | -0.4543717 |
| C | -0.2472363 | 1.5594809  | 0.6391817  |
| C | -0.6517423 | 3.5166326  | -0.7510062 |

|   |            |            |            |
|---|------------|------------|------------|
| C | 0.2366246  | 2.5702227  | -0.2093086 |
| H | -6.1625663 | 2.2537794  | 1.1587679  |
| H | -1.9919080 | 0.7051372  | 1.6025687  |
| H | -2.7188758 | 4.1777376  | -0.8816534 |
| H | 0.4350408  | 0.7984969  | 1.0269741  |
| H | -0.2782895 | 4.2998989  | -1.4183316 |
| H | 1.2966081  | 2.5979625  | -0.4714137 |
| C | 5.1945329  | -2.8817067 | 0.6504609  |
| C | 4.9588305  | -1.6818874 | 0.5963023  |
| C | 4.6615186  | -0.2833452 | 0.5204835  |
| C | 3.6302791  | 0.2771212  | 1.3160647  |
| C | 5.3855252  | 0.5548890  | -0.3659893 |
| C | 3.3355903  | 1.6435920  | 1.2243288  |
| C | 5.0795921  | 1.9209884  | -0.4515242 |
| C | 4.0556064  | 2.4686714  | 0.3425662  |
| H | 5.4158734  | -3.9302157 | 0.7108822  |
| H | 3.0575691  | -0.3700929 | 1.9844276  |
| H | 6.1772100  | 0.1220970  | -0.9839093 |
| H | 2.5299757  | 2.0656128  | 1.8313373  |
| H | 5.6414538  | 2.5603901  | -1.1395643 |
| H | 3.8166952  | 3.5344108  | 0.2718125  |

-----  
Tetramer-17

|   |            |            |            |
|---|------------|------------|------------|
| C | -1.6457869 | 2.9571956  | 0.2451016  |
| C | -0.5743476 | 3.3878699  | -0.5790967 |
| C | -1.4210054 | 1.9227261  | 1.1881124  |
| C | 0.6898476  | 2.7939773  | -0.4557733 |
| C | -0.1515831 | 1.3426130  | 1.3054761  |
| C | 0.9056340  | 1.7724393  | 0.4860329  |
| C | -1.1462089 | -1.2044215 | -2.5068782 |
| C | -2.1142516 | -2.2254557 | -2.6904133 |
| C | -1.5533144 | 0.0507004  | -1.9893306 |
| C | -3.4557428 | -1.9937340 | -2.3572872 |
| C | -2.8997950 | 0.2745804  | -1.6693838 |
| C | -3.8523246 | -0.7437883 | -1.8478150 |
| C | 0.2287294  | -1.4686004 | -2.8059633 |
| C | 1.3988820  | -1.7428794 | -3.0369914 |
| C | -2.9460313 | 3.5418087  | 0.1072855  |
| C | -4.0662277 | 4.0165278  | -0.0300107 |
| H | -0.7501904 | 4.1795949  | -1.3127607 |
| H | -2.2497316 | 1.5692612  | 1.8071298  |
| H | 1.5107845  | 3.1222983  | -1.1001978 |
| H | 0.0109107  | 0.5426505  | 2.0299461  |
| H | -1.7981014 | -3.1963622 | -3.0820098 |
| H | -0.8105804 | 0.8324768  | -1.8154774 |
| H | -4.1923288 | -2.7924202 | -2.4913179 |
| H | -3.2054284 | 1.2415250  | -1.2632606 |
| H | -4.8987473 | -0.5676168 | -1.5802500 |
| H | 2.4292633  | -1.9967433 | -3.1878188 |
| H | -5.0411311 | 4.4524616  | -0.1329942 |



|   |            |            |            |
|---|------------|------------|------------|
| H | 1.8889157  | 1.3066524  | 0.5737467  |
| C | 3.9732507  | -0.4659334 | -0.1922153 |
| C | 3.8465189  | 0.4423411  | -1.2737302 |
| C | 4.3716558  | 0.0260371  | 1.0769646  |
| C | 4.1274716  | 1.8027117  | -1.0891311 |
| C | 4.6418449  | 1.3903095  | 1.2527910  |
| C | 4.5249435  | 2.2823472  | 0.1715310  |
| C | 3.7082202  | -1.8605581 | -0.3747586 |
| C | 3.4881633  | -3.0553320 | -0.5203114 |
| H | 3.5148998  | 0.0748914  | -2.2473238 |
| H | 4.4643730  | -0.6701767 | 1.9150117  |
| H | 4.0268887  | 2.4936511  | -1.9318332 |
| H | 4.9436343  | 1.7595153  | 2.2378341  |
| H | 3.2713442  | -4.0981966 | -0.6492162 |
| H | 4.7344931  | 3.3469568  | 0.3137495  |
| C | -4.4069359 | -0.9090336 | 2.5019121  |
| C | -3.2348576 | -1.2426614 | 2.3866348  |
| C | -1.8524667 | -1.5863532 | 2.2403796  |
| C | -1.3121160 | -1.8439192 | 0.9557223  |
| C | -1.0005652 | -1.6370243 | 3.3733130  |
| C | 0.0533634  | -2.1224030 | 0.8078270  |
| C | 0.3627067  | -1.9252430 | 3.2152988  |
| C | 0.8944638  | -2.1626631 | 1.9339416  |
| H | -5.4402405 | -0.6406868 | 2.6074526  |
| H | -1.9666217 | -1.7954346 | 0.0842321  |
| H | -1.4163768 | -1.4384006 | 4.3651898  |
| H | 0.4710875  | -2.2838860 | -0.1894196 |
| H | 1.0135317  | -1.9563536 | 4.0953067  |
| H | 1.9608650  | -2.3681862 | 1.8055669  |

-----  
Tetramer-18 (Te10)

|   |            |            |            |
|---|------------|------------|------------|
| C | -2.9576710 | -0.1766576 | 2.4077892  |
| C | -3.4469665 | 0.9414528  | 1.7098641  |
| C | -2.8705924 | -1.4212805 | 1.7604434  |
| H | -3.4999923 | 1.9160288  | 2.2032565  |
| H | -2.4895678 | -2.2948148 | 2.2986977  |
| C | -3.8420680 | 0.8220295  | 0.3721243  |
| C | -3.2620934 | -1.5524486 | 0.4210351  |
| H | -4.1974202 | 1.6948736  | -0.1806314 |
| H | -3.1745730 | -2.5134581 | -0.0903167 |
| C | -3.7482496 | -0.4277090 | -0.2899357 |
| H | -2.6267190 | -0.0730180 | 3.4449196  |
| C | -4.1144776 | -0.5426734 | -1.6690111 |
| C | -4.3922583 | -0.6323821 | -2.8587836 |
| H | -4.6912230 | -0.7158170 | -3.8858206 |
| C | -0.2116174 | 1.5794788  | 0.9908605  |
| C | -0.5588232 | 2.9531672  | 0.9730892  |
| C | -0.4115682 | 0.8013966  | -0.1728884 |
| H | -0.3859061 | 3.5602990  | 1.8652919  |
| H | -0.1291713 | -0.2488753 | -0.1776665 |

|   |            |            |            |
|---|------------|------------|------------|
| C | -1.1038675 | 3.5248245  | -0.1838582 |
| C | -0.9609130 | 1.3793723  | -1.3213082 |
| H | -1.3634504 | 4.5884337  | -0.1909746 |
| H | -1.1181346 | 0.7585565  | -2.2068302 |
| C | -1.3118611 | 2.7396092  | -1.3329141 |
| H | -1.7424689 | 3.1893668  | -2.2333283 |
| C | 0.3296044  | 0.9877017  | 2.1759506  |
| C | 0.7754458  | 0.4850360  | 3.1988912  |
| H | 1.1868996  | 0.0587787  | 4.0924696  |
| C | 2.5257423  | -0.2378015 | -1.8759846 |
| C | 2.9125924  | -0.2654970 | -0.5248482 |
| C | 2.3096594  | 0.9945469  | -2.5166570 |
| H | 3.0687798  | -1.2219865 | -0.0211580 |
| H | 1.9999855  | 1.0208631  | -3.5664061 |
| C | 3.0769477  | 0.9289004  | 0.1870351  |
| C | 2.4707024  | 2.1956214  | -1.8126542 |
| H | 3.3489068  | 0.9112443  | 1.2448781  |
| H | 2.2871840  | 3.1559424  | -2.3018808 |
| C | 2.8534120  | 2.1761889  | -0.4485139 |
| H | 2.3725672  | -1.1759463 | -2.4169826 |
| C | 3.0007599  | 3.3971813  | 0.2840190  |
| C | 3.1224945  | 4.4376925  | 0.9172556  |
| H | 3.2420840  | 5.3498747  | 1.4687857  |
| C | -1.1042192 | -2.2661635 | -2.1208164 |
| C | -0.2332570 | -2.6394127 | -1.3470367 |
| C | 0.7912916  | -3.0099677 | -0.4194310 |
| C | 0.6945349  | -2.6230709 | 0.9411645  |
| C | 1.9312576  | -3.7326939 | -0.8524314 |
| C | 1.7212067  | -2.9444174 | 1.8383737  |
| C | 2.9520322  | -4.0503084 | 0.0536141  |
| C | 2.8524377  | -3.6561893 | 1.4012032  |
| H | -1.9158881 | -1.9300774 | -2.7389596 |
| H | -0.1734029 | -2.0535507 | 1.2805520  |
| H | 2.0083463  | -4.0277365 | -1.9025475 |
| H | 1.6418637  | -2.6232633 | 2.8812678  |
| H | 3.8312012  | -4.6024001 | -0.2931458 |
| H | 3.6562611  | -3.8981156 | 2.1035968  |

---

Tetramer-19

|   |            |            |            |
|---|------------|------------|------------|
| C | -3.2842542 | 0.6830429  | 1.0309203  |
| C | -2.7034611 | 0.6304158  | -0.2479010 |
| C | -4.1624066 | -0.3343042 | 1.4436516  |
| H | -2.0214401 | 1.4194538  | -0.5700293 |
| H | -4.6204316 | -0.2974768 | 2.4375417  |
| C | -2.9889243 | -0.4354491 | -1.1093037 |
| C | -4.4582576 | -1.4035782 | 0.5864855  |
| H | -2.5243284 | -0.4902316 | -2.0966932 |
| H | -5.1437778 | -2.1963611 | 0.9000533  |
| C | -3.8680976 | -1.4688980 | -0.7001937 |
| H | -3.0406258 | 1.5095855  | 1.7037286  |

|   |            |            |            |
|---|------------|------------|------------|
| C | -4.1453012 | -2.5726035 | -1.5688417 |
| C | -4.3712603 | -3.5241697 | -2.3055975 |
| H | -4.5967836 | -4.3411357 | -2.9633623 |
| C | -0.0968505 | -1.0010701 | 1.2436777  |
| C | 0.6578738  | -0.6742750 | 0.0922298  |
| C | -0.9115350 | -2.1607493 | 1.2310624  |
| H | 1.3025447  | 0.2036427  | 0.0939294  |
| H | -1.5082508 | -2.4047220 | 2.1134972  |
| C | 0.5917838  | -1.4840643 | -1.0473324 |
| C | -0.9676117 | -2.9673268 | 0.0879120  |
| H | 1.1786793  | -1.2098210 | -1.9286746 |
| H | -1.6183560 | -3.8465042 | 0.0775848  |
| C | -0.2186218 | -2.6325411 | -1.0549653 |
| H | -0.2783685 | -3.2611085 | -1.9492732 |
| C | -0.0404780 | -0.1749094 | 2.4110751  |
| C | -0.0019813 | 0.5279102  | 3.4130580  |
| H | 0.0380246  | 1.1284212  | 4.3005838  |
| C | 4.1529563  | 0.3500081  | 0.4284640  |
| C | 4.2565620  | -0.8209706 | -0.3641159 |
| C | 3.6968184  | 0.2654347  | 1.7504098  |
| H | 3.6064688  | 1.1765139  | 2.3497494  |
| C | 3.8977369  | -2.0706790 | 0.1992351  |
| C | 3.3409751  | -0.9780171 | 2.3019984  |
| H | 3.9700107  | -2.9727717 | -0.4142963 |
| H | 2.9614872  | -1.0334580 | 3.3261539  |
| C | 3.4443439  | -2.1430873 | 1.5227591  |
| H | 4.4179690  | 1.3163780  | -0.0074325 |
| H | 3.1532117  | -3.1113417 | 1.9409811  |
| C | 4.7086528  | -0.7402371 | -1.7202294 |
| C | 5.0721031  | -0.6567142 | -2.8870014 |
| H | 5.4357701  | -0.5985592 | -3.8948746 |
| C | 2.3112652  | 1.7567785  | -2.1138582 |
| C | 1.3757304  | 2.3359768  | -1.5782424 |
| C | 0.2781543  | 2.9716798  | -0.9154716 |
| C | -0.6926545 | 3.6986546  | -1.6504323 |
| C | 0.1380893  | 2.8638982  | 0.4914338  |
| C | -1.7741904 | 4.2986125  | -0.9902168 |
| C | -0.9446406 | 3.4698139  | 1.1411863  |
| C | -1.9038104 | 4.1888605  | 0.4065318  |
| H | 3.1355379  | 1.2219839  | -2.5497737 |
| H | -0.5893647 | 3.7798057  | -2.7360518 |
| H | 0.8662545  | 2.2866503  | 1.0650784  |
| H | -2.5223103 | 4.8491517  | -1.5693431 |
| H | -1.0451372 | 3.3610231  | 2.2251563  |
| H | -2.7542278 | 4.6531291  | 0.9161873  |

-----  
Tetramer-20

|   |            |            |            |
|---|------------|------------|------------|
| C | -3.6836178 | -2.8418500 | 1.1211514  |
| C | -3.1555650 | -1.5618138 | 1.3608094  |
| C | -4.0311738 | -3.2207461 | -0.1890775 |

|   |            |            |            |
|---|------------|------------|------------|
| H | -2.8529584 | -1.2713968 | 2.3707687  |
| H | -4.4458187 | -4.2155220 | -0.3828871 |
| C | -2.9775202 | -0.6591394 | 0.3041445  |
| C | -3.8523132 | -2.3273402 | -1.2533410 |
| H | -2.5565423 | 0.3300893  | 0.4895263  |
| H | -4.1186300 | -2.6169669 | -2.2736953 |
| C | -3.3254795 | -1.0321387 | -1.0169003 |
| H | -3.8200346 | -3.5440723 | 1.9500199  |
| C | -3.1555903 | -0.1169865 | -2.1048823 |
| C | -3.0311871 | 0.6641201  | -3.0389717 |
| H | -2.9260268 | 1.3579852  | -3.8502039 |
| C | 0.2220342  | -1.5760529 | 0.9008487  |
| C | 0.5955115  | -0.3747795 | 0.2519719  |
| C | -0.1767524 | -2.6900758 | 0.1221583  |
| H | 0.9083076  | 0.4875910  | 0.8424669  |
| H | -0.4859707 | -3.6096292 | 0.6241348  |
| C | 0.5756359  | -0.2968034 | -1.1456613 |
| C | -0.2028450 | -2.5977578 | -1.2749639 |
| H | 0.8740478  | 0.6377493  | -1.6263526 |
| H | -0.5309039 | -3.4580355 | -1.8659475 |
| C | 0.1755082  | -1.4033382 | -1.9139371 |
| H | 0.1467159  | -1.3330382 | -3.0052108 |
| C | 0.2390816  | -1.6645010 | 2.3287637  |
| C | 0.2549011  | -1.7460420 | 3.5501679  |
| H | 0.2603463  | -1.8169747 | 4.6204520  |
| C | 4.3077227  | 0.0200335  | 0.9785871  |
| C | 4.4671135  | -0.0759489 | -0.4272357 |
| C | 3.7914034  | -1.0615813 | 1.7037313  |
| H | 3.6584081  | -0.9747122 | 2.7860640  |
| C | 4.0948566  | -1.2751312 | -1.0844240 |
| C | 3.4240571  | -2.2473472 | 1.0437813  |
| H | 4.2117970  | -1.3481251 | -2.1689571 |
| H | 2.9926943  | -3.0758501 | 1.6124160  |
| C | 3.5769807  | -2.3493946 | -0.3492562 |
| H | 4.5874323  | 0.9474119  | 1.4857689  |
| H | 3.2736106  | -3.2626360 | -0.8693756 |
| C | 4.9916153  | 1.0294166  | -1.1708641 |
| C | 5.4138259  | 1.9943956  | -1.7962757 |
| H | 5.8123291  | 2.8257438  | -2.3451003 |
| C | 2.0759249  | 2.8953327  | -0.3794797 |
| C | 0.9118294  | 3.1298611  | -0.0813852 |
| C | -0.4583477 | 3.3823207  | 0.2478882  |
| C | -0.7992126 | 4.3066559  | 1.2678161  |
| C | -1.4956667 | 2.7111051  | -0.4474111 |
| C | -2.1443576 | 4.5555625  | 1.5742289  |
| C | -2.8375898 | 2.9699883  | -0.1365661 |
| C | -3.1683200 | 3.8921613  | 0.8728249  |
| H | 3.0887177  | 2.6714995  | -0.6643813 |
| H | -0.0010885 | 4.8226200  | 1.8090787  |
| H | -1.2476271 | 1.9799865  | -1.2198211 |

|   |            |           |            |
|---|------------|-----------|------------|
| H | -2.3938452 | 5.2721885 | 2.3639015  |
| H | -3.6204804 | 2.4370869 | -0.6843651 |
| H | -4.2174226 | 4.0925903 | 1.1135681  |

-----  
Tetramer-21

|   |            |            |            |
|---|------------|------------|------------|
| C | -3.9214756 | -1.9482723 | -0.3478072 |
| C | -3.7125543 | -1.5298003 | 0.9767654  |
| C | -4.4120560 | -1.0369530 | -1.3002071 |
| H | -3.3092664 | -2.2294318 | 1.7141359  |
| H | -4.5710554 | -1.3572749 | -2.3349977 |
| C | -3.9890084 | -0.2092010 | 1.3530292  |
| C | -4.6914704 | 0.2867095  | -0.9355266 |
| H | -3.8172039 | 0.1223373  | 2.3806198  |
| H | -5.0724672 | 0.9990978  | -1.6728536 |
| C | -4.4847554 | 0.7159730  | 0.4005851  |
| H | -3.6809786 | -2.9742604 | -0.6411907 |
| C | -4.7771707 | 2.0653192  | 0.7814594  |
| C | -5.0197462 | 3.2226026  | 1.1013683  |
| H | -5.2563769 | 4.2287678  | 1.3897793  |
| C | -0.3901596 | -2.5699786 | -0.4385355 |
| C | -0.0758746 | -2.4340508 | 0.9361925  |
| C | -0.7767214 | -1.4224087 | -1.1748428 |
| H | 0.2411114  | -3.3145149 | 1.5007593  |
| H | -1.0251090 | -1.5282821 | -2.2338884 |
| C | -0.1455070 | -1.1781810 | 1.5518065  |
| C | -0.8461013 | -0.1729366 | -0.5487979 |
| H | 0.1270251  | -1.0766315 | 2.6061933  |
| H | -1.1500224 | 0.7088468  | -1.1167550 |
| C | -0.5315484 | -0.0461888 | 0.8137432  |
| H | -0.5783096 | 0.9361593  | 1.2885609  |
| C | -0.3147634 | -3.8477303 | -1.0790616 |
| C | -0.2495981 | -4.9386025 | -1.6317833 |
| H | -0.1973773 | -5.8969009 | -2.1109935 |
| C | 3.2140251  | -2.6585784 | -0.7584046 |
| C | 3.6997783  | -2.9410256 | 0.5308890  |
| C | 2.7101147  | -1.3789334 | -1.0493004 |
| H | 4.0904826  | -3.9369966 | 0.7643088  |
| H | 2.3137670  | -1.1571283 | -2.0440359 |
| C | 3.6790610  | -1.9539814 | 1.5262368  |
| C | 2.6805373  | -0.3871077 | -0.0625592 |
| H | 4.0492436  | -2.1712327 | 2.5325005  |
| H | 2.2633714  | 0.5947411  | -0.2827321 |
| C | 3.1616257  | -0.6656785 | 1.2404462  |
| H | 3.2111779  | -3.4381614 | -1.5261612 |
| C | 3.0883887  | 0.3286061  | 2.2681984  |
| C | 2.9932430  | 1.1633768  | 3.1587592  |
| H | 2.9320601  | 1.9014778  | 3.9346679  |
| C | -1.4907959 | 3.3440825  | -0.0369541 |
| C | -0.3143680 | 3.2420640  | -0.3590257 |
| C | 1.0565169  | 3.0725461  | -0.7334126 |

|   |            |           |            |
|---|------------|-----------|------------|
| C | 2.0949922  | 3.3026578 | 0.2034908  |
| C | 1.3949169  | 2.6503054 | -2.0451627 |
| C | 3.4346186  | 3.1220026 | -0.1664855 |
| C | 2.7375664  | 2.4735701 | -2.4058446 |
| C | 3.7613952  | 2.7105128 | -1.4702789 |
| H | -2.5263874 | 3.3967070 | 0.2506951  |
| H | 1.8376233  | 3.6027931 | 1.2221078  |
| H | 0.5960655  | 2.4617572 | -2.7675708 |
| H | 4.2239942  | 3.2820016 | 0.5735152  |
| H | 2.9872073  | 2.1433826 | -3.4192011 |
| H | 4.8079454  | 2.5598716 | -1.7521868 |

-----  
Tetramer-22 (Tel1)

|   |            |            |            |
|---|------------|------------|------------|
| C | -1.3192254 | 2.8561467  | -0.6889051 |
| C | -0.7333878 | 2.6925142  | -1.9700094 |
| C | -0.5868599 | 2.4593331  | 0.4582397  |
| C | 0.5539833  | 2.1512544  | -2.0908182 |
| C | 0.6978220  | 1.9177343  | 0.3249274  |
| C | 1.2736001  | 1.7627744  | -0.9473699 |
| C | 1.0914398  | -2.7163013 | -0.4757669 |
| C | 0.8625389  | -2.3744812 | -1.8324889 |
| C | 0.2824513  | -2.1281271 | 0.5295170  |
| C | -0.1527940 | -1.4684163 | -2.1675662 |
| C | -0.7294405 | -1.2242043 | 0.1821199  |
| C | -0.9504914 | -0.8932009 | -1.1644809 |
| C | 2.1366126  | -3.6286683 | -0.1227376 |
| C | 3.0603629  | -4.3701249 | 0.1879346  |
| C | -2.6281560 | 3.4209769  | -0.5544500 |
| C | -3.7516986 | 3.8918304  | -0.4316090 |
| H | -1.2966548 | 2.9967072  | -2.8568948 |
| H | -1.0372902 | 2.5773971  | 1.4469352  |
| H | 0.9955964  | 2.0252096  | -3.0845949 |
| H | 1.2496259  | 1.6100338  | 1.2161646  |
| H | 1.4863746  | -2.8255835 | -2.6095179 |
| H | 0.4609343  | -2.3865622 | 1.5771891  |
| H | -0.3206968 | -1.2074897 | -3.2171767 |
| H | -1.3467771 | -0.7748372 | 0.9619787  |
| H | -1.7337553 | -0.1797532 | -1.4275363 |
| H | 3.8467466  | -5.0476764 | 0.4594010  |
| H | -4.7321797 | 4.3147943  | -0.3268507 |
| H | 2.2706992  | 1.3288202  | -1.0457677 |
| C | 3.9363520  | 0.6670590  | 1.2442417  |
| C | 3.6976103  | -0.5673916 | 0.5908757  |
| C | 4.6406440  | 1.6888268  | 0.5575789  |
| C | 4.1520180  | -0.7718556 | -0.7186136 |
| C | 5.0932700  | 1.4737084  | -0.7513734 |
| C | 4.8507587  | 0.2448755  | -1.3935189 |
| C | 3.4514457  | 0.8849622  | 2.5740331  |
| C | 3.0047261  | 1.0794720  | 3.6970121  |
| H | 3.1502490  | -1.3573271 | 1.1085034  |

|   |            |            |            |
|---|------------|------------|------------|
| H | 4.8179478  | 2.6452019  | 1.0572190  |
| H | 3.9516139  | -1.7293303 | -1.2069240 |
| H | 5.6333982  | 2.2695854  | -1.2740878 |
| H | 2.6388560  | 1.2432859  | 4.6922522  |
| H | 5.2026048  | 0.0834230  | -2.4175267 |
| C | -4.7681390 | -1.9692969 | -2.2936800 |
| C | -4.5081588 | -1.5690283 | -1.1668193 |
| C | -4.1777812 | -1.0907297 | 0.1411016  |
| C | -3.9579289 | 0.2919196  | 0.3596641  |
| C | -4.0426326 | -1.9916553 | 1.2271981  |
| C | -3.6069870 | 0.7581913  | 1.6333877  |
| C | -3.6924732 | -1.5154768 | 2.4981355  |
| C | -3.4719311 | -0.1411773 | 2.7064812  |
| H | -5.0108752 | -2.3240244 | -3.2767143 |
| H | -4.0489559 | 0.9944043  | -0.4717845 |
| H | -4.2038625 | -3.0599120 | 1.0589908  |
| H | -3.4348484 | 1.8284516  | 1.7757962  |
| H | -3.5857780 | -2.2206757 | 3.3286998  |
| H | -3.1940380 | 0.2246469  | 3.7001195  |

-----  
Tetramer-23

|   |            |            |            |
|---|------------|------------|------------|
| C | -4.2125299 | -1.6998976 | -0.7158063 |
| C | -3.9434593 | -1.5342695 | 0.6534640  |
| C | -4.5748090 | -0.5880897 | -1.4972263 |
| H | -3.6417020 | -2.3931330 | 1.2598747  |
| H | -4.7829002 | -0.7123626 | -2.5651354 |
| C | -4.0346048 | -0.2673375 | 1.2429802  |
| C | -4.6687142 | 0.6844159  | -0.9172655 |
| H | -3.8162146 | -0.1328361 | 2.3055031  |
| H | -4.9508848 | 1.5518437  | -1.5207368 |
| C | -4.4020133 | 0.8592164  | 0.4644196  |
| H | -4.1256569 | -2.6896201 | -1.1744080 |
| C | -4.5071802 | 2.1553353  | 1.0663446  |
| C | -4.5973996 | 3.2640849  | 1.5790833  |
| H | -4.6994160 | 4.2279386  | 2.0404183  |
| C | -0.5510494 | -2.5408495 | -0.3940949 |
| C | -0.2609017 | -2.4124821 | 0.9868737  |
| C | -0.8641062 | -1.3788143 | -1.1427048 |
| H | -0.0055978 | -3.3054531 | 1.5630804  |
| H | -1.0940795 | -1.4780925 | -2.2065247 |
| C | -0.2800905 | -1.1511348 | 1.5959284  |
| C | -0.8826293 | -0.1237049 | -0.5238556 |
| H | -0.0333804 | -1.0593803 | 2.6577322  |
| H | -1.1283076 | 0.7700517  | -1.1017178 |
| C | -0.5906651 | -0.0045859 | 0.8448042  |
| H | -0.5970059 | 0.9823140  | 1.3130149  |
| C | -0.5265527 | -3.8254705 | -1.0263918 |
| C | -0.5054233 | -4.9233431 | -1.5696779 |
| H | -0.4892389 | -5.8868061 | -2.0411766 |
| C | 3.5595473  | -3.1192085 | 0.6548071  |

|   |            |            |            |
|---|------------|------------|------------|
| C | 3.5478325  | -2.1132794 | 1.6311889  |
| C | 3.1427692  | -2.8369970 | -0.6585074 |
| H | 3.8665851  | -2.3293437 | 2.6550959  |
| H | 3.1378104  | -3.6286265 | -1.4140062 |
| C | 3.1115826  | -0.8050132 | 1.3020054  |
| C | 2.7153788  | -1.5396222 | -0.9915522 |
| H | 2.3791821  | -1.3166572 | -2.0082519 |
| C | 2.6974923  | -0.5275221 | -0.0243818 |
| H | 3.8914788  | -4.1286452 | 0.9202592  |
| H | 2.3491203  | 0.4738282  | -0.2798432 |
| C | 3.0642472  | 0.2158020  | 2.3058824  |
| C | 3.0004070  | 1.0778096  | 3.1728635  |
| H | 2.9601233  | 1.8358586  | 3.9311194  |
| C | -1.2577896 | 3.4576770  | -0.0402381 |
| C | -0.0978915 | 3.2901803  | -0.3948592 |
| C | 1.2527842  | 3.0482565  | -0.8043499 |
| C | 2.3290243  | 3.2586033  | 0.0942959  |
| C | 1.5329115  | 2.5748352  | -2.1122705 |
| C | 3.6475569  | 3.0066337  | -0.3087827 |
| C | 2.8548211  | 2.3262601  | -2.5063731 |
| C | 3.9162013  | 2.5424591  | -1.6084146 |
| H | -2.2772894 | 3.5605400  | 0.2881637  |
| H | 2.1165162  | 3.6035038  | 1.1090616  |
| H | 0.7046860  | 2.4053465  | -2.8056813 |
| H | 4.4668834  | 3.1573050  | 0.4004883  |
| H | 3.0592520  | 1.9590146  | -3.5172805 |
| H | 4.9463837  | 2.3397000  | -1.9171461 |

-----  
Tetramer-24 (Te12)

|   |            |            |            |
|---|------------|------------|------------|
| C | -2.1234753 | -1.4828511 | -1.4259205 |
| C | -1.8019679 | -0.9227952 | -0.1779214 |
| C | -2.3415374 | -0.6441702 | -2.5329803 |
| H | -1.6320192 | -1.5729620 | 0.6836064  |
| H | -2.5919969 | -1.0751028 | -3.5080024 |
| C | -1.6981598 | 0.4641196  | -0.0309080 |
| C | -2.2399309 | 0.7474978  | -2.3960698 |
| H | -1.4485751 | 0.9023731  | 0.9369654  |
| H | -2.4086286 | 1.4051798  | -3.2534949 |
| C | -1.9162406 | 1.3167721  | -1.1397406 |
| H | -2.2019711 | -2.5681216 | -1.5333132 |
| C | -1.8101651 | 2.7365587  | -0.9933255 |
| C | -1.7185931 | 3.9513417  | -0.8700049 |
| H | -1.6377470 | 5.0157522  | -0.7642200 |
| C | 1.5666329  | -1.2053652 | -0.5067348 |
| C | 1.8291967  | -0.6238679 | 0.7576867  |
| C | 1.3844001  | -0.3623533 | -1.6300039 |
| H | 1.9848161  | -1.2742077 | 1.6218394  |
| H | 1.1665802  | -0.8097321 | -2.6028487 |
| C | 1.9097235  | 0.7678056  | 0.8894787  |
| C | 1.4626819  | 1.0284047  | -1.4865692 |



|   |            |            |            |
|---|------------|------------|------------|
| H | 2.1298924  | 1.2077446  | 1.8664590  |
| H | 1.3024625  | 1.6723265  | -2.3561901 |
| C | 1.7264711  | 1.5984017  | -0.2292690 |
| H | 1.7879758  | 2.6844899  | -0.1213878 |
| C | 1.4865630  | -2.6274190 | -0.6473099 |
| C | 1.4188660  | -3.8441171 | -0.7674833 |
| H | 1.3557377  | -4.9098183 | -0.8723559 |
| C | 5.4441422  | -1.5309888 | 1.5726817  |
| C | 5.5182706  | -0.1388467 | 1.7201547  |
| C | 5.1582282  | -2.0970279 | 0.3175070  |
| H | 5.7359992  | 0.3066637  | 2.6951573  |
| H | 5.0842665  | -3.1831866 | 0.2079047  |
| C | 5.3046061  | 0.7089922  | 0.6046440  |
| C | 4.9496786  | -1.2619968 | -0.7941821 |
| H | 4.7098252  | -1.6987838 | -1.7680984 |
| C | 5.0238330  | 0.1295581  | -0.6576208 |
| H | 5.6078964  | -2.1769809 | 2.4417831  |
| H | 4.8419065  | 0.7824244  | -1.5147836 |
| C | 5.3540804  | 2.1323373  | 0.7546911  |
| C | 5.3770586  | 3.3490910  | 0.8863597  |
| H | 5.4198461  | 4.4156620  | 0.9970885  |
| C | -5.0583687 | -3.4753645 | 0.9797781  |
| C | -5.0213876 | -2.2527091 | 1.0311313  |
| C | -4.9538266 | -0.8234180 | 1.0856304  |
| C | -5.2232199 | -0.0470837 | -0.0687651 |
| C | -4.5975676 | -0.1668597 | 2.2900779  |
| C | -5.1293349 | 1.3490518  | -0.0175218 |
| C | -4.5075980 | 1.2315079  | 2.3314187  |
| C | -4.7709545 | 1.9936044  | 1.1795105  |
| H | -5.1124126 | -4.5462542 | 0.9412723  |
| H | -5.4822414 | -0.5530804 | -1.0021488 |
| H | -4.3894631 | -0.7646843 | 3.1820732  |
| H | -5.3182308 | 1.9381534  | -0.9198679 |
| H | -4.2274632 | 1.7284422  | 3.2662101  |
| H | -4.6829590 | 3.0836737  | 1.2091368  |

-----  
Tetramer-25 (Tel3)

|   |            |           |            |
|---|------------|-----------|------------|
| C | -1.0315436 | 3.0695773 | -0.1838663 |
| C | -1.4893618 | 3.4993447 | 1.0882409  |
| C | -1.5354049 | 3.7102187 | -1.3447729 |
| C | -2.4229798 | 4.5400381 | 1.1921056  |
| C | -2.4705832 | 4.7490688 | -1.2317658 |
| C | -2.9188315 | 5.1691183 | 0.0348708  |
| C | -0.0847534 | 2.0019472 | -0.2903998 |
| C | 0.7317555  | 1.0943199 | -0.3700460 |
| H | -1.1129237 | 2.9992557 | 1.9848063  |
| H | -1.1910300 | 3.3772594 | -2.3276790 |
| H | -2.7706112 | 4.8570380 | 2.1804827  |
| H | -2.8548920 | 5.2305452 | -2.1367005 |
| H | -3.6506768 | 5.9787512 | 0.1189648  |

|   |            |            |            |
|---|------------|------------|------------|
| H | 1.4271900  | 0.2788013  | -0.4311034 |
| C | 0.4129373  | -2.4537336 | -0.2121002 |
| C | 1.0086228  | -2.3899164 | -1.4977057 |
| C | 1.2246055  | -2.2325981 | 0.9300735  |
| C | 2.3762123  | -2.1092645 | -1.6319388 |
| C | 2.5897649  | -1.9483543 | 0.7841870  |
| C | 3.1732786  | -1.8856399 | -0.4942439 |
| C | -0.9878843 | -2.7148613 | -0.0733872 |
| C | -2.1879315 | -2.9265737 | 0.0379655  |
| H | 0.3846816  | -2.5536661 | -2.3805900 |
| H | 0.7673335  | -2.2740857 | 1.9223229  |
| H | 2.8214126  | -2.0596780 | -2.6308449 |
| H | 3.2050983  | -1.7642828 | 1.6696313  |
| H | 4.2363055  | -1.6558182 | -0.5997276 |
| H | -3.2480569 | -3.0683028 | 0.1320350  |
| C | -5.1418436 | -0.8593848 | 0.0801408  |
| C | -5.2724154 | -1.4599021 | 1.3584167  |
| C | -5.4286495 | -1.6333485 | -1.0730754 |
| C | -5.6723258 | -2.7986592 | 1.4752597  |
| C | -5.8283777 | -2.9714117 | -0.9470496 |
| C | -5.9503028 | -3.5608800 | 0.3251998  |
| C | -4.7054120 | 0.4982537  | -0.0417704 |
| C | -4.3164906 | 1.6540444  | -0.1396810 |
| H | -5.0461452 | -0.8677850 | 2.2492692  |
| H | -5.3232427 | -1.1759390 | -2.0605673 |
| H | -5.7611187 | -3.2511505 | 2.4680600  |
| H | -6.0392865 | -3.5590964 | -1.8461988 |
| H | -6.2579349 | -4.6071737 | 0.4194996  |
| H | -3.9380766 | 2.6556931  | -0.2217279 |
| C | 3.5311532  | 2.6017693  | 0.6538144  |
| C | 4.4005204  | 1.7498845  | 0.5313319  |
| C | 5.3700588  | 0.7120890  | 0.3627902  |
| C | 5.6902450  | -0.1574284 | 1.4358622  |
| C | 5.9955206  | 0.5108975  | -0.8940556 |
| C | 6.5969976  | -1.2095990 | 1.2478926  |
| C | 6.9017130  | -0.5437367 | -1.0725088 |
| C | 7.2035534  | -1.4102039 | -0.0057402 |
| H | 2.7463981  | 3.3273536  | 0.7464088  |
| H | 5.2110487  | -0.0027633 | 2.4065252  |
| H | 5.7513868  | 1.1809733  | -1.7229939 |
| H | 6.8299538  | -1.8784874 | 2.0826518  |
| H | 7.3710525  | -0.6931085 | -2.0503504 |
| H | 7.9088154  | -2.2350108 | -0.1495847 |

-----  
Tetramer-26 (Te15)

|   |            |            |            |
|---|------------|------------|------------|
| C | -1.6730651 | -4.1359800 | -0.1897710 |
| C | -1.2014978 | -4.8881243 | 0.9168891  |
| C | -1.3063010 | -4.5414669 | -1.4991536 |
| C | -0.3869585 | -6.0115834 | 0.7152675  |
| C | -0.4911655 | -5.6664125 | -1.6909636 |

|   |            |            |            |
|---|------------|------------|------------|
| C | -0.0284319 | -6.4056775 | -0.5868697 |
| C | -2.4977042 | -2.9823258 | 0.0103726  |
| C | -3.1950267 | -1.9912665 | 0.1808460  |
| C | 4.1393094  | -1.6713004 | 0.1898925  |
| C | 4.8937080  | -1.2029227 | -0.9165495 |
| C | 4.5453973  | -1.3055605 | 1.4993403  |
| C | 6.0203542  | -0.3928644 | -0.7146601 |
| C | 5.6735544  | -0.4949231 | 1.6914537  |
| C | 6.4153462  | -0.0356688 | 0.5875841  |
| C | 2.9829752  | -2.4922431 | -0.0107931 |
| C | 1.9904198  | -3.1868910 | -0.1821626 |
| H | -1.4768106 | -4.5758083 | 1.9279455  |
| H | -1.6633356 | -3.9615851 | -2.3546453 |
| H | -0.0245357 | -6.5790448 | 1.5783567  |
| H | -0.2115266 | -5.9650344 | -2.7063093 |
| H | 0.6122374  | -7.2796902 | -0.7399847 |
| H | -3.8038740 | -1.1178433 | 0.3251002  |
| H | 4.5807032  | -1.4772192 | -1.9276803 |
| H | 3.9635719  | -1.6598258 | 2.3546809  |
| H | 6.5897048  | -0.0330464 | -1.5775802 |
| H | 5.9728391  | -0.2161978 | 2.7068489  |
| H | 7.2921145  | 0.6011622  | 0.7409520  |
| H | 1.1155822  | -3.7936746 | -0.3271748 |
| C | -4.1444648 | 1.6749668  | 0.2059895  |
| C | -4.8835233 | 1.2116007  | -0.9128670 |
| C | -4.5635785 | 1.2962054  | 1.5076040  |
| C | -6.0078597 | 0.3936755  | -0.7306373 |
| C | -5.6892825 | 0.4777531  | 1.6800525  |
| C | -6.4157500 | 0.0235073  | 0.5639779  |
| C | -2.9906793 | 2.5042061  | 0.0254462  |
| C | -2.0009390 | 3.2071632  | -0.1277858 |
| H | -4.5606481 | 1.4961318  | -1.9180559 |
| H | -3.9937935 | 1.6467656  | 2.3725278  |
| H | -6.5651976 | 0.0378192  | -1.6029882 |
| H | -5.9985945 | 0.1889299  | 2.6895968  |
| H | -7.2904877 | -0.6195775 | 0.7020231  |
| H | -1.1277662 | 3.8196382  | -0.2585867 |
| H | 3.8101367  | 1.1204394  | 0.3266990  |
| C | 3.1998349  | 1.9924588  | 0.1798750  |
| C | 2.5006040  | 2.9815250  | 0.0062686  |
| C | 1.6758800  | 4.1346716  | -0.1967672 |
| C | 1.2896504  | 4.5234150  | -1.5055955 |
| H | 1.6304921  | 3.9301677  | -2.3585195 |
| C | 0.4763166  | 5.6491788  | -1.6999756 |
| H | 0.1816328  | 5.9349094  | -2.7147726 |
| H | -0.6046233 | 7.2805723  | -0.7541197 |
| C | 0.0344971  | 6.4057695  | -0.5990691 |
| C | 0.4120175  | 6.0280959  | 0.7026098  |
| H | 0.0660763  | 6.6092029  | 1.5633701  |
| C | 1.2250651  | 4.9039580  | 0.9067844  |

H 1.5156184 4.6046460 1.9175093

-----  
Tetramer-27 (Tel4)

|   |            |            |            |
|---|------------|------------|------------|
| C | -4.8752230 | 2.0281940  | 0.0000209  |
| C | -4.9806056 | 1.3303349  | -1.2151974 |
| C | -4.9805693 | 1.3303384  | 1.2152240  |
| H | -4.8835594 | 1.8667839  | -2.1642265 |
| H | -4.8834318 | 1.8667796  | 2.1642703  |
| C | -5.1940043 | -0.0545344 | -1.2212342 |
| C | -5.1940308 | -0.0545224 | 1.2212586  |
| H | -5.2683618 | -0.6022998 | -2.1647653 |
| H | -5.2684506 | -0.6022929 | 2.1647517  |
| C | -5.3038411 | -0.7646531 | 0.0000074  |
| H | -4.6877893 | 3.1059400  | 0.0000269  |
| C | -5.5151962 | -2.1803112 | 0.0000397  |
| C | -5.6930343 | -3.3914797 | -0.0000026 |
| H | -5.8635657 | -4.4506952 | -0.0000617 |
| C | -1.2934732 | 3.2319466  | -0.0000049 |
| C | -1.3845714 | 2.5315489  | -1.2160292 |
| C | -1.3845334 | 2.5315388  | 1.2160044  |
| H | -1.3141662 | 3.0712231  | -2.1660244 |
| H | -1.3140224 | 3.0711956  | 2.1660071  |
| C | -1.5647803 | 1.1426640  | -1.2194722 |
| C | -1.5648337 | 1.1426622  | 1.2194895  |
| H | -1.6379497 | 0.5936021  | -2.1613338 |
| H | -1.6381254 | 0.5936077  | 2.1612964  |
| C | -1.6577536 | 0.4291179  | -0.0000500 |
| C | -1.8442679 | -0.9873537 | -0.0000367 |
| C | -2.0055009 | -2.1990541 | 0.0000081  |
| H | -2.1434459 | -3.2616230 | 0.0000440  |
| H | -1.1520731 | 4.3175646  | -0.0000038 |
| C | 1.8637094  | 1.1592406  | 0.0000388  |
| C | 1.7841627  | 0.4580744  | -1.2136207 |
| C | 1.7841258  | 0.4580653  | 1.2136573  |
| H | 1.8455245  | 0.9994014  | -2.1619374 |
| H | 1.8454396  | 0.9993805  | 2.1620024  |
| C | 1.6269893  | -0.9337088 | -1.2203959 |
| C | 1.6269703  | -0.9337282 | 1.2204489  |
| H | 1.5634373  | -1.4828010 | -2.1632579 |
| H | 1.5634228  | -1.4828365 | 2.1632591  |
| C | 1.5464526  | -1.6467081 | -0.0000169 |
| H | 1.9865496  | 2.2448201  | 0.0000414  |
| C | 1.3876008  | -3.0683006 | -0.0000178 |
| C | 1.2565800  | -4.2855374 | -0.0000231 |
| H | 1.1321101  | -5.3508718 | -0.0000964 |
| C | 5.1491596  | -0.3064757 | 0.0000100  |
| C | 5.2092239  | 0.4105016  | 1.2208496  |
| C | 5.2092589  | 0.4104638  | -1.2208648 |
| H | 5.1530365  | -0.1399890 | 2.1637890  |
| H | 5.1530924  | -0.1400504 | -2.1637755 |

|   |           |            |            |
|---|-----------|------------|------------|
| C | 5.3236033 | 1.8069829  | 1.2163177  |
| C | 5.3236468 | 1.8069522  | -1.2163672 |
| H | 5.3659377 | 2.3497479  | 2.1664411  |
| H | 5.3660217 | 2.3496855  | -2.1665033 |
| C | 5.3797001 | 2.5108160  | -0.0000337 |
| H | 5.4685291 | 3.6021891  | -0.0000515 |
| C | 5.0069085 | -1.7299221 | 0.0000152  |
| C | 4.8661501 | -2.9450965 | 0.0000313  |
| H | 4.6856199 | -4.0022949 | 0.0000536  |

\*\*\*\*\*

**Pentamer**

\*\*\*\*\*

Pentamer-01 (P1)

|   |            |            |            |
|---|------------|------------|------------|
| C | 3.9827469  | 3.5796483  | 0.5145860  |
| C | 3.8408701  | 2.3879528  | 0.7542307  |
| C | 3.6292856  | 0.9974613  | 1.0201930  |
| C | 3.6530657  | 0.5020880  | 2.3479682  |
| C | 3.3563209  | 0.1050768  | -0.0464522 |
| C | 3.4108039  | -0.8557047 | 2.5975541  |
| C | 3.1148468  | -1.2503510 | 0.2143236  |
| C | 3.1431171  | -1.7360915 | 1.5333997  |
| H | 4.1288027  | 4.6212544  | 0.3042410  |
| H | 3.8453315  | 1.1935446  | 3.1728056  |
| H | 3.3186885  | 0.4875282  | -1.0681554 |
| H | 3.4170477  | -1.2250393 | 3.6275833  |
| H | 2.8859156  | -1.9297693 | -0.6101385 |
| H | 2.9391272  | -2.7935258 | 1.7236249  |
| C | 0.0911255  | 4.2884957  | -1.6396591 |
| C | 0.5432639  | 3.2136503  | -2.0115307 |
| C | 1.0689585  | 1.9565799  | -2.4527420 |
| C | 0.4728756  | 0.7375206  | -2.0422170 |
| C | 2.1946148  | 1.9207359  | -3.3151874 |
| C | 0.9821026  | -0.4835206 | -2.5016714 |
| C | 2.6984721  | 0.6925996  | -3.7653550 |
| C | 2.0903070  | -0.5119372 | -3.3650525 |
| H | -0.3060503 | 5.2310527  | -1.3168727 |
| H | -0.3803521 | 0.7524319  | -1.3624713 |
| H | 2.6633344  | 2.8600415  | -3.6209321 |
| H | 0.5166602  | -1.4137188 | -2.1759622 |
| H | 3.5681327  | 0.6765995  | -4.4296413 |
| H | 2.4861627  | -1.4702934 | -3.7157445 |
| C | -0.7322567 | -2.0682528 | 3.8015797  |
| C | -0.6717229 | -0.9266874 | 3.3648339  |
| C | -0.5942030 | 0.4047387  | 2.8449781  |
| C | 0.2770071  | 0.7023168  | 1.7671671  |
| C | -1.3863701 | 1.4404880  | 3.4021163  |
| C | 0.3604418  | 2.0087765  | 1.2707130  |

|   |            |            |            |
|---|------------|------------|------------|
| C | -1.2978063 | 2.7441149  | 2.8945189  |
| C | -0.4230489 | 3.0317188  | 1.8304732  |
| H | -0.7868853 | -3.0732879 | 4.1722942  |
| H | 0.8807121  | -0.0920101 | 1.3281792  |
| H | -2.0704290 | 1.2088385  | 4.2220156  |
| H | 1.0371672  | 2.2345184  | 0.4463611  |
| H | -1.9186449 | 3.5351137  | 3.3264379  |
| H | -0.3564773 | 4.0464378  | 1.4276020  |
| C | 2.5142492  | -5.0331101 | -0.1710863 |
| C | 1.4769159  | -4.4229258 | -0.3953161 |
| C | 0.2839535  | -3.6798065 | -0.6704481 |
| C | -0.1723975 | -2.6931772 | 0.2395452  |
| C | -0.4461926 | -3.9092393 | -1.8653305 |
| C | -1.3224009 | -1.9472714 | -0.0484695 |
| C | -1.5935281 | -3.1526339 | -2.1446010 |
| C | -2.0315434 | -2.1652680 | -1.2425524 |
| H | 3.4128277  | -5.5827276 | 0.0327529  |
| H | 0.3762528  | -2.5139245 | 1.1657742  |
| H | -0.0988941 | -4.6733391 | -2.5662063 |
| H | -1.6675520 | -1.1949897 | 0.6625463  |
| H | -2.1436249 | -3.3297715 | -3.0741181 |
| H | -2.9177653 | -1.5665365 | -1.4669161 |
| C | -4.1576638 | -0.8936200 | 2.6191219  |
| C | -4.1608958 | -0.3330684 | 1.5319689  |
| C | -4.0999992 | 0.2958543  | 0.2479475  |
| C | -3.0464527 | 1.1967071  | -0.0509307 |
| C | -5.0621241 | 0.0018624  | -0.7513429 |
| C | -2.9570290 | 1.7829391  | -1.3205212 |
| C | -4.9596992 | 0.5877918  | -2.0212839 |
| C | -3.9079457 | 1.4766491  | -2.3106809 |
| H | -4.1330601 | -1.3815043 | 3.5737669  |
| H | -2.3032994 | 1.4197759  | 0.7157938  |
| H | -5.8747915 | -0.6934078 | -0.5232774 |
| H | -2.1395220 | 2.4764618  | -1.5387530 |
| H | -5.7036641 | 0.3488710  | -2.7883711 |
| H | -3.8300092 | 1.9291317  | -3.3043709 |

\*\*\*\*\*

#### Pentamer-02 (P2)

|   |            |            |           |
|---|------------|------------|-----------|
| C | -1.2990416 | -4.0386925 | 1.6410690 |
| C | -0.9592471 | -2.8979232 | 1.9251019 |
| C | -0.5442374 | -1.5574326 | 2.2092589 |
| C | -0.0106925 | -1.2067954 | 3.4757579 |
| C | -0.6488700 | -0.5640283 | 1.2047777 |
| C | 0.4128755  | 0.1082989  | 3.7188692 |
| C | -0.2247058 | 0.7455468  | 1.4580186 |
| C | 0.3102326  | 1.0866887  | 2.7118119 |
| H | -1.5911511 | -5.0393412 | 1.3883421 |
| H | 0.0755213  | -1.9721149 | 4.2517601 |
| H | -1.0693423 | -0.8300053 | 0.2374141 |
| H | 0.8339877  | 0.3673905  | 4.6951240 |

|   |            |            |            |
|---|------------|------------|------------|
| H | -0.3178603 | 1.4994038  | 0.6755161  |
| H | 0.6515617  | 2.1090804  | 2.8953208  |
| C | 0.4932339  | -4.5665157 | -2.1888711 |
| C | -0.0500188 | -3.4696848 | -2.1772550 |
| C | -0.6904571 | -2.1895214 | -2.1437114 |
| C | 0.0620558  | -0.9994353 | -2.3115523 |
| C | -2.0886676 | -2.0973455 | -1.9213614 |
| C | -0.5740284 | 0.2484865  | -2.2636776 |
| C | -2.7147769 | -0.8445246 | -1.8754277 |
| C | -1.9608583 | 0.3298854  | -2.0513476 |
| H | 0.9689793  | -5.5277667 | -2.2087808 |
| H | 1.1425623  | -1.0622967 | -2.4555800 |
| H | -2.6655840 | -3.0130064 | -1.7678269 |
| H | 0.0204662  | 1.1575845  | -2.3755267 |
| H | -3.7872843 | -0.7817670 | -1.6753600 |
| H | -2.4468690 | 1.3063267  | -1.9893341 |
| C | 4.8983011  | 1.0675856  | 2.8401451  |
| C | 4.5703754  | 0.2199660  | 2.0202905  |
| C | 4.1602304  | -0.7401384 | 1.0402016  |
| C | 2.8268925  | -1.2213459 | 1.0315177  |
| C | 5.0687373  | -1.1988003 | 0.0522401  |
| C | 2.4105008  | -2.1292337 | 0.0497885  |
| C | 4.6414849  | -2.1083343 | -0.9262886 |
| C | 3.3125037  | -2.5722693 | -0.9336395 |
| H | 5.1979126  | 1.7937693  | 3.5708259  |
| H | 2.1253697  | -0.8663244 | 1.7869116  |
| H | 6.0973378  | -0.8277848 | 0.0571142  |
| H | 1.3785068  | -2.4869223 | 0.0467708  |
| H | 5.3481351  | -2.4520747 | -1.6885602 |
| H | 2.9709688  | -3.2706964 | -1.7028747 |
| C | 0.7628586  | 4.5804954  | 1.3756175  |
| C | 1.1729727  | 3.9435104  | 0.4138357  |
| C | 1.6572577  | 3.1949903  | -0.7072450 |
| C | 2.3459779  | 1.9721714  | -0.5068922 |
| C | 1.4606560  | 3.6721544  | -2.0286842 |
| C | 2.8298052  | 1.2492312  | -1.6049351 |
| C | 1.9528414  | 2.9430043  | -3.1202623 |
| C | 2.6399326  | 1.7325899  | -2.9115367 |
| H | 0.4091389  | 5.1365476  | 2.2222079  |
| H | 2.4955220  | 1.5976384  | 0.5068598  |
| H | 0.9257584  | 4.6132006  | -2.1848760 |
| H | 3.3526099  | 0.3055078  | -1.4373696 |
| H | 1.7968432  | 3.3189361  | -4.1362283 |
| H | 3.0166398  | 1.1627957  | -3.7666752 |
| C | -2.4520221 | 3.3872205  | 0.3074593  |
| C | -3.2704200 | 2.4796917  | 0.3735568  |
| C | -4.1785929 | 1.3737647  | 0.4003162  |
| C | -3.9538686 | 0.2865165  | 1.2815532  |
| C | -5.2849490 | 1.3279226  | -0.4849597 |
| C | -4.8050983 | -0.8261750 | 1.2605266  |

|   |            |            |            |
|---|------------|------------|------------|
| C | -6.1360936 | 0.2137175  | -0.4928997 |
| C | -5.8972125 | -0.8680927 | 0.3749720  |
| H | -1.6964087 | 4.1498765  | 0.2817175  |
| H | -3.0968816 | 0.3153595  | 1.9574109  |
| H | -5.4594830 | 2.1654367  | -1.1663875 |
| H | -4.6074256 | -1.6677581 | 1.9315345  |
| H | -6.9863446 | 0.1869879  | -1.1819807 |
| H | -6.5596315 | -1.7396299 | 0.3594256  |

\*\*\*\*\*

Pentamer-03 (P4)

|   |            |            |            |
|---|------------|------------|------------|
| C | -1.3008449 | 4.0406649  | -1.6550008 |
| C | -0.9577466 | 2.8963566  | -1.9199927 |
| C | -0.5419957 | 1.5557651  | -2.2023649 |
| C | -0.0170318 | 1.2085607  | -3.4734908 |
| C | -0.6381011 | 0.5605771  | -1.1989169 |
| C | 0.4041074  | -0.1058794 | -3.7234560 |
| C | -0.2168248 | -0.7487601 | -1.4593059 |
| C | 0.3077836  | -1.0866171 | -2.7182521 |
| H | -1.5940284 | 5.0448551  | -1.4182242 |
| H | 0.0637663  | 1.9765115  | -4.2474939 |
| H | -1.0482926 | 0.8248969  | -0.2268141 |
| H | 0.8161046  | -0.3640771 | -4.7037686 |
| H | -0.3035114 | -1.5060739 | -0.6793612 |
| H | 0.6464947  | -2.1088359 | -2.9074637 |
| C | 0.4969981  | 4.5674796  | 2.1988037  |
| C | -0.0463816 | 3.4708756  | 2.1811854  |
| C | -0.6886602 | 2.1916657  | 2.1452444  |
| C | 0.0618639  | 0.9999669  | 2.3114606  |
| C | -2.0873108 | 2.1029084  | 1.9234224  |
| C | -0.5772411 | -0.2465606 | 2.2661906  |
| C | -2.7160995 | 0.8512370  | 1.8780732  |
| C | -1.9644798 | -0.3244249 | 2.0555206  |
| H | 0.9722976  | 5.5289409  | 2.2203275  |
| H | 1.1432771  | 1.0605427  | 2.4504383  |
| H | -2.6619934 | 3.0200565  | 1.7700971  |
| H | 0.0142265  | -1.1578756 | 2.3783937  |
| H | -3.7886301 | 0.7888949  | 1.6780089  |
| H | -2.4529851 | -1.2996227 | 1.9947020  |
| C | 4.9043041  | -1.0551343 | -2.8522173 |
| C | 4.5651878  | -0.2180705 | -2.0260452 |
| C | 4.1566360  | 0.7383290  | -1.0416990 |
| C | 2.8250163  | 1.2239925  | -1.0273830 |
| C | 5.0708907  | 1.1923384  | -0.0566454 |
| C | 2.4173996  | 2.1362605  | -0.0458817 |
| C | 4.6523027  | 2.1059510  | 0.9218126  |
| C | 3.3261384  | 2.5775828  | 0.9319809  |
| H | 5.2128171  | -1.7747874 | -3.5855521 |
| H | 2.1180926  | 0.8702928  | -1.7785367 |
| H | 6.0970838  | 0.8146095  | -0.0648329 |
| H | 1.3878204  | 2.5008991  | -0.0382943 |



|   |            |            |            |
|---|------------|------------|------------|
| H | 5.3626453  | 2.4484493  | 1.6812158  |
| H | 2.9917561  | 3.2811946  | 1.6996546  |
| C | 0.7583978  | -4.5895009 | -1.3661264 |
| C | 1.1698215  | -3.9434782 | -0.4109780 |
| C | 1.6564396  | -3.1936860 | 0.7081858  |
| C | 2.3489504  | -1.9728044 | 0.5083029  |
| C | 1.4596058  | -3.6720931 | 2.0292889  |
| C | 2.8388737  | -1.2545187 | 1.6068730  |
| C | 1.9576587  | -2.9474484 | 3.1211410  |
| C | 2.6506445  | -1.7405180 | 2.9125627  |
| H | 0.4050087  | -5.1547868 | -2.2067409 |
| H | 2.4964068  | -1.5960637 | -0.5050451 |
| H | 0.9207416  | -4.6111691 | 2.1841218  |
| H | 3.3655253  | -0.3123705 | 1.4417789  |
| H | 1.8029807  | -3.3233208 | 4.1372767  |
| H | 3.0346227  | -1.1755477 | 3.7676863  |
| C | -2.4602450 | -3.3895444 | -0.3084167 |
| C | -3.2759529 | -2.4789510 | -0.3652952 |
| C | -4.1838757 | -1.3728109 | -0.3920482 |
| C | -3.9583861 | -0.2873469 | -1.2757518 |
| C | -5.2919670 | -1.3260956 | 0.4912803  |
| C | -4.8147805 | 0.8215119  | -1.2637059 |
| C | -6.1472580 | -0.2149567 | 0.4911025  |
| C | -5.9106138 | 0.8623711  | -0.3828519 |
| H | -1.7056621 | -4.1534254 | -0.2883010 |
| H | -3.0972586 | -0.3152459 | -1.9464933 |
| H | -5.4652286 | -2.1607129 | 1.1768242  |
| H | -4.6204490 | 1.6608844  | -1.9384453 |
| H | -7.0003748 | -0.1863189 | 1.1765796  |
| H | -6.5781164 | 1.7300546  | -0.3757631 |

\*\*\*\*\*

#### Pentamer-04 (P3)

|   |            |            |            |
|---|------------|------------|------------|
| C | -0.3095383 | -4.9211252 | 1.2706594  |
| C | -0.1618194 | -3.7494314 | 1.5929444  |
| C | -0.0046139 | -2.3784721 | 1.9748166  |
| C | 0.5270922  | -2.0422505 | 3.2464478  |
| C | -0.3888902 | -1.3427217 | 1.0883714  |
| C | 0.6674848  | -0.6970732 | 3.6172609  |
| C | -0.2394455 | -0.0044831 | 1.4684937  |
| C | 0.2839255  | 0.3251043  | 2.7303612  |
| H | -0.4172277 | -5.9477094 | 0.9783475  |
| H | 0.8277478  | -2.8421911 | 3.9286057  |
| H | -0.8048643 | -1.5981016 | 0.1148985  |
| H | 1.0874826  | -0.4460183 | 4.5959222  |
| H | -0.5278265 | 0.7851751  | 0.7737726  |
| H | 0.4043091  | 1.3752935  | 3.0079041  |
| C | 1.8522867  | -3.7648253 | -3.1524872 |
| C | 0.9817415  | -2.9442787 | -2.8930521 |
| C | -0.0401467 | -1.9944673 | -2.5706253 |
| C | 0.2766188  | -0.6245407 | -2.3851675 |

|   |            |            |            |
|---|------------|------------|------------|
| C | -1.3847888 | -2.4206242 | -2.4155098 |
| C | -0.7321593 | 0.2935206  | -2.0646008 |
| C | -2.3832356 | -1.4936565 | -2.0888326 |
| C | -2.0623287 | -0.1349099 | -1.9185648 |
| H | 2.6113515  | -4.4862812 | -3.3852401 |
| H | 1.3135536  | -0.2947006 | -2.4758749 |
| H | -1.6260867 | -3.4795417 | -2.5398102 |
| H | -0.4759955 | 1.3435776  | -1.9121855 |
| H | -3.4128029 | -1.8300796 | -1.9419082 |
| H | -2.8440325 | 0.5803423  | -1.6535679 |
| C | 4.2151243  | 1.6920451  | 3.1346612  |
| C | 4.1987342  | 1.0008296  | 2.1246751  |
| C | 4.1563256  | 0.2176438  | 0.9263643  |
| C | 3.1411656  | -0.7544195 | 0.7424179  |
| C | 5.1142447  | 0.4216463  | -0.1001376 |
| C | 3.0769815  | -1.4898291 | -0.4476922 |
| C | 5.0434008  | -0.3237745 | -1.2860212 |
| C | 4.0220266  | -1.2754497 | -1.4659320 |
| H | 4.2478417  | 2.2856669  | 4.0277703  |
| H | 2.4055838  | -0.9168906 | 1.5302450  |
| H | 5.8973087  | 1.1719015  | 0.0406178  |
| H | 2.2843264  | -2.2279809 | -0.5898553 |
| H | 5.7845339  | -0.1579044 | -2.0746050 |
| H | 3.9532991  | -1.8471393 | -2.3960303 |
| C | -0.9552355 | 3.7625105  | 2.2282144  |
| C | -0.3326051 | 3.5879195  | 1.1890091  |
| C | 0.3787094  | 3.3723894  | -0.0352714 |
| C | 1.5055006  | 2.5120071  | -0.0743604 |
| C | -0.0459268 | 4.0139227  | -1.2272546 |
| C | 2.1830119  | 2.2956205  | -1.2815236 |
| C | 0.6455054  | 3.7980463  | -2.4273601 |
| C | 1.7589603  | 2.9382929  | -2.4578990 |
| H | -1.4889273 | 3.9203339  | 3.1454498  |
| H | 1.8370630  | 2.0117270  | 0.8372147  |
| H | -0.9171329 | 4.6741773  | -1.1977699 |
| H | 3.0401501  | 1.6189345  | -1.3017829 |
| H | 0.3116598  | 4.2967838  | -3.3424709 |
| H | 2.2891519  | 2.7634860  | -3.3991287 |
| C | -3.5523814 | -2.6860078 | 1.6314240  |
| C | -3.9089154 | -1.5925984 | 1.2151058  |
| C | -4.2635645 | -0.3109768 | 0.6872479  |
| C | -3.5775773 | 0.8536058  | 1.1160551  |
| C | -5.2664373 | -0.1916713 | -0.3080726 |
| C | -3.8726472 | 2.0992075  | 0.5451168  |
| C | -5.5603344 | 1.0592433  | -0.8687787 |
| C | -4.8623147 | 2.2069162  | -0.4487682 |
| H | -3.1886177 | -3.6301494 | 1.9901033  |
| H | -2.7978582 | 0.7630189  | 1.8750201  |
| H | -5.7965656 | -1.0882648 | -0.6419433 |
| H | -3.3131706 | 2.9826867  | 0.8669530  |

H -6.3336321 1.1399163 -1.6393689  
H -5.0886367 3.1797912 -0.8965079

\*\*\*\*\*

Pentamer-05 (P5)

C -0.0775430 4.3088037 -2.1650795  
C -0.3857883 3.1277964 -2.0737488  
C -0.7337059 1.7442600 -1.9568896  
C -1.0381506 0.9737996 -3.1079426  
C -0.7726933 1.1270927 -0.6825884  
C -1.3690163 -0.3828345 -2.9777748  
C -1.0987368 -0.2277634 -0.5654869  
C -1.3967126 -0.9876427 -1.7080449  
H 0.2033400 5.3406330 -2.2481678  
H -1.0033537 1.4471968 -4.0929591  
H -0.5578108 1.7200944 0.2048882  
H -1.5996285 -0.9718565 -3.8704087  
H -1.1327855 -0.6912714 0.4200116  
H -1.6520575 -2.0447280 -1.6046111  
C 3.3296771 4.2401536 0.4981464  
C 2.4756789 3.5790350 1.0732492  
C 1.4668072 2.8042345 1.7305660  
C 1.6545469 1.4173395 1.9571870  
C 0.2568173 3.4158097 2.1493584  
C 0.6567113 0.6650430 2.5909808  
C -0.7366149 2.6524572 2.7779102  
C -0.5391944 1.2776278 3.0010190  
H 4.0799006 4.8218177 -0.0018406  
H 2.5717317 0.9342062 1.6146417  
H 0.1067335 4.4827735 1.9641644  
H 0.8101865 -0.4028018 2.7546106  
H -1.6703957 3.1307465 3.0892881  
H -1.3197843 0.6811747 3.4816702  
C 2.0701161 -3.5080289 -3.3279099  
C 2.5521321 -2.5070260 -2.8146554  
C 3.1116087 -1.3465197 -2.1895035  
C 2.2952413 -0.2231467 -1.9053061  
C 4.4828112 -1.3164165 -1.8265440  
C 2.8377115 0.8988630 -1.2662176  
C 5.0148664 -0.1891502 -1.1841316  
C 4.1946666 0.9187077 -0.8994647  
H 1.6553771 -4.3826535 -3.7906412  
H 1.2400512 -0.2443938 -2.1781124  
H 5.1122458 -2.1840916 -2.0432338  
H 2.2007279 1.7585327 -1.0465033  
H 6.0728726 -0.1754498 -0.9025109  
H 4.6038201 1.7951595 -0.3886186  
C -2.1393518 -3.3702381 0.8478019  
C -0.9933573 -3.2030411 1.2434266  
C 0.3368104 -2.9283924 1.6968156  
C 1.2989898 -2.3901175 0.8041626

|   |            |            |            |
|---|------------|------------|------------|
| C | 0.6975609  | -3.1501898 | 3.0508419  |
| C | 2.5832608  | -2.0681235 | 1.2630731  |
| C | 1.9873362  | -2.8303633 | 3.4981495  |
| C | 2.9312402  | -2.2852640 | 2.6079359  |
| H | -3.1365678 | -3.4748146 | 0.4596519  |
| H | 1.0288830  | -2.2121631 | -0.2381172 |
| H | -0.0436927 | -3.5642391 | 3.7403658  |
| H | 3.3093155  | -1.6391744 | 0.5688212  |
| H | 2.2557174  | -3.0015723 | 4.5454262  |
| H | 3.9334009  | -2.0261771 | 2.9635287  |
| C | -5.2486819 | -2.9620571 | -1.1423529 |
| C | -4.9391747 | -1.8470249 | -0.7404843 |
| C | -4.5580749 | -0.5498390 | -0.2695515 |
| C | -4.4529683 | 0.5368054  | -1.1737144 |
| C | -4.2695497 | -0.3403529 | 1.1021811  |
| C | -4.0677601 | 1.8013433  | -0.7124683 |
| C | -3.8879888 | 0.9305640  | 1.5525882  |
| C | -3.7846970 | 2.0021435  | 0.6497725  |
| H | -5.5509485 | -3.9276616 | -1.4993268 |
| H | -4.6549855 | 0.3703530  | -2.2347560 |
| H | -4.3373481 | -1.1806946 | 1.7982079  |
| H | -3.9669469 | 2.6291550  | -1.4200526 |
| H | -3.6621703 | 1.0843371  | 2.6117972  |
| H | -3.4642112 | 2.9868816  | 1.0019529  |

\*\*\*\*\*

#### Pentamer-06 (P6)

|   |            |            |            |
|---|------------|------------|------------|
| C | 2.4107658  | 4.7116413  | 1.2488533  |
| C | 2.8089806  | 3.5588294  | 1.1489913  |
| C | 3.2581581  | 2.2043102  | 1.0311355  |
| C | 3.9851282  | 1.5899416  | 2.0834044  |
| C | 2.9678326  | 1.4558319  | -0.1369867 |
| C | 4.3993834  | 0.2552572  | 1.9673483  |
| C | 3.3849026  | 0.1226921  | -0.2408625 |
| C | 4.0973213  | -0.4833084 | 0.8082935  |
| H | 2.0623218  | 5.7226644  | 1.3319694  |
| H | 4.2051866  | 2.1651868  | 2.9869800  |
| H | 2.4084029  | 1.9239189  | -0.9477410 |
| H | 4.9472314  | -0.2147709 | 2.7897060  |
| H | 3.1442775  | -0.4519041 | -1.1378640 |
| H | 4.3981741  | -1.5310488 | 0.7243670  |
| C | -1.5021676 | 4.0537590  | 0.2191571  |
| C | -0.8974350 | 3.3918323  | -0.6130738 |
| C | -0.1833132 | 2.6183090  | -1.5828178 |
| C | -0.2631006 | 1.2021791  | -1.5823383 |
| C | 0.6297241  | 3.2651153  | -2.5487513 |
| C | 0.4511708  | 0.4562057  | -2.5292771 |
| C | 1.3451736  | 2.5087475  | -3.4873468 |
| C | 1.2569243  | 1.1041304  | -3.4813409 |
| H | -2.0249308 | 4.6230652  | 0.9625660  |
| H | -0.8636252 | 0.6971083  | -0.8250490 |

|   |            |            |            |
|---|------------|------------|------------|
| H | 0.7018808  | 4.3559145  | -2.5410772 |
| H | 0.3883074  | -0.6333016 | -2.5163015 |
| H | 1.9767244  | 3.0161723  | -4.2231010 |
| H | 1.8215220  | 0.5156993  | -4.2112068 |
| C | 2.1286485  | -3.0889043 | 3.4704451  |
| C | 1.2691358  | -2.2639989 | 3.1899222  |
| C | 0.2675205  | -1.3099502 | 2.8189882  |
| C | 0.6420077  | -0.0672955 | 2.2497855  |
| C | -1.1093677 | -1.6057734 | 2.9904830  |
| C | -0.3391942 | 0.8510992  | 1.8546049  |
| C | -2.0819054 | -0.6828346 | 2.5830543  |
| C | -1.7027784 | 0.5439320  | 2.0081721  |
| H | 2.8792986  | -3.8077238 | 3.7364300  |
| H | 1.6988539  | 0.1621840  | 2.1136595  |
| H | -1.4006163 | -2.5661825 | 3.4245527  |
| H | -0.0401819 | 1.8060940  | 1.4162951  |
| H | -3.1405844 | -0.9294418 | 2.6945118  |
| H | -2.4662292 | 1.2480325  | 1.6662885  |
| C | 4.2638571  | -3.2149012 | -1.6124926 |
| C | 3.0435345  | -3.1217148 | -1.6163403 |
| C | 1.6161025  | -3.0077340 | -1.6384982 |
| C | 0.9094392  | -2.5235158 | -0.5077028 |
| C | 0.8944029  | -3.3808394 | -2.8017840 |
| C | -0.4894396 | -2.4309353 | -0.5403811 |
| C | -0.5037605 | -3.2859028 | -2.8221621 |
| C | -1.1986306 | -2.8191199 | -1.6911885 |
| H | 5.3333226  | -3.2988451 | -1.6018927 |
| H | 1.4627738  | -2.2252854 | 0.3845996  |
| H | 1.4415457  | -3.7464128 | -3.6752632 |
| H | -1.0281515 | -2.0606916 | 0.3348302  |
| H | -1.0535852 | -3.5821201 | -3.7210277 |
| H | -2.2901913 | -2.7680481 | -1.6981130 |
| C | -4.1943220 | -3.2664500 | 0.3492542  |
| C | -4.2946559 | -2.0553038 | 0.2058915  |
| C | -4.3993914 | -0.6350773 | 0.0622563  |
| C | -5.2429734 | 0.1072869  | 0.9260213  |
| C | -3.6459605 | 0.0498490  | -0.9240886 |
| C | -5.3276385 | 1.5012122  | 0.8016451  |
| C | -3.7387088 | 1.4420335  | -1.0411027 |
| C | -4.5779033 | 2.1716318  | -0.1813302 |
| H | -4.1031386 | -4.3298906 | 0.4590148  |
| H | -5.8190248 | -0.4192362 | 1.6922019  |
| H | -2.9788349 | -0.5140491 | -1.5796952 |
| H | -5.9811768 | 2.0661697  | 1.4739602  |
| H | -3.1370233 | 1.9645557  | -1.7885350 |
| H | -4.6346019 | 3.2603888  | -0.2712855 |

\*\*\*\*\*

#### Pentamer-07

|   |           |           |           |
|---|-----------|-----------|-----------|
| C | 2.4113715 | 4.7125654 | 1.2507174 |
| C | 2.8076370 | 3.5590021 | 1.1523160 |

|   |            |            |            |
|---|------------|------------|------------|
| C | 3.2564620  | 2.2045408  | 1.0349803  |
| C | 3.9824781  | 1.5900681  | 2.0875715  |
| C | 2.9699589  | 1.4564287  | -0.1340948 |
| C | 4.3971414  | 0.2555431  | 1.9724831  |
| C | 3.3875339  | 0.1234278  | -0.2376027 |
| C | 4.0973066  | -0.4836205 | 0.8130575  |
| H | 2.0665538  | 5.7246763  | 1.3338112  |
| H | 4.2047732  | 2.1663346  | 2.9898315  |
| H | 2.4160271  | 1.9257388  | -0.9478732 |
| H | 4.9452943  | -0.2121518 | 2.7961927  |
| H | 3.1507028  | -0.4487334 | -1.1372571 |
| H | 4.4002649  | -1.5308649 | 0.7286033  |
| C | -1.5017492 | 4.0550244  | 0.2141423  |
| C | -0.8949976 | 3.3930822  | -0.6165396 |
| C | -0.1796625 | 2.6195129  | -1.5851096 |
| C | -0.2591279 | 1.2036883  | -1.5838211 |
| C | 0.6330323  | 3.2651239  | -2.5519536 |
| C | 0.4551515  | 0.4565988  | -2.5297737 |
| C | 1.3481357  | 2.5080331  | -3.4901564 |
| C | 1.2611270  | 1.1033099  | -3.4828165 |
| H | -2.0260416 | 4.6272706  | 0.9540249  |
| H | -0.8604510 | 0.6994420  | -0.8267739 |
| H | 0.7043346  | 4.3559486  | -2.5463409 |
| H | 0.3910162  | -0.6328153 | -2.5141038 |
| H | 1.9779689  | 3.0165080  | -4.2269995 |
| H | 1.8258885  | 0.5138610  | -4.2119967 |
| C | 2.1238832  | -3.0870889 | 3.4676622  |
| C | 1.2644306  | -2.2608425 | 3.1894168  |
| C | 0.2632896  | -1.3064060 | 2.8199233  |
| C | 0.6371850  | -0.0634833 | 2.2513677  |
| C | -1.1134180 | -1.6009047 | 2.9931586  |
| C | -0.3439063 | 0.8554814  | 1.8574605  |
| C | -2.0862846 | -0.6786378 | 2.5853123  |
| C | -1.7078239 | 0.5488423  | 2.0109398  |
| H | 2.8740067  | -3.8018736 | 3.7441635  |
| H | 1.6939323  | 0.1664755  | 2.1160925  |
| H | -1.4044173 | -2.5596158 | 3.4309358  |
| H | -0.0430535 | 1.8098856  | 1.4187399  |
| H | -3.1446001 | -0.9282419 | 2.6949147  |
| H | -2.4715644 | 1.2533231  | 1.6699864  |
| C | 4.2683581  | -3.2108151 | -1.6124906 |
| C | 3.0479907  | -3.1200573 | -1.6151457 |
| C | 1.6204197  | -3.0086594 | -1.6374183 |
| C | 0.9122921  | -2.5266852 | -0.5068529 |
| C | 0.8990541  | -3.3841841 | -2.7999247 |
| C | -0.4865985 | -2.4353628 | -0.5397941 |
| C | -0.4992380 | -3.2910179 | -2.8209377 |
| C | -1.1956377 | -2.8243858 | -1.6906346 |
| H | 5.3372046  | -3.3014084 | -1.5991861 |
| H | 1.4642756  | -2.2314273 | 0.3871328  |

|   |            |            |            |
|---|------------|------------|------------|
| H | 1.4464789  | -3.7519927 | -3.6721955 |
| H | -1.0242958 | -2.0664341 | 0.3367913  |
| H | -1.0469646 | -3.5898486 | -3.7204368 |
| H | -2.2875829 | -2.7764311 | -1.6968510 |
| C | -4.1920083 | -3.2676082 | 0.3505115  |
| C | -4.2941175 | -2.0565767 | 0.2056647  |
| C | -4.4004421 | -0.6370045 | 0.0603730  |
| C | -5.2474589 | 0.1055380  | 0.9203156  |
| C | -3.6465503 | 0.0477703  | -0.9254048 |
| C | -5.3347726 | 1.4989728  | 0.7932921  |
| C | -3.7402149 | 1.4396190  | -1.0443622 |
| C | -4.5830984 | 2.1698021  | -0.1883008 |
| H | -4.1062471 | -4.3315861 | 0.4562867  |
| H | -5.8254756 | -0.4206752 | 1.6851072  |
| H | -2.9798483 | -0.5169317 | -1.5807254 |
| H | -5.9921426 | 2.0622014  | 1.4635564  |
| H | -3.1358571 | 1.9604906  | -1.7910706 |
| H | -4.6418255 | 3.2584272  | -0.2803501 |

\*\*\*\*\*

Pentamer-08

|   |            |            |            |
|---|------------|------------|------------|
| C | 0.3492104  | 2.9114337  | -1.5919350 |
| C | 0.2551170  | 1.5299444  | -1.2909005 |
| C | 1.6232769  | 3.4759545  | -1.8498997 |
| C | 1.4076062  | 0.7356010  | -1.2421263 |
| C | 2.7705016  | 2.6732964  | -1.7971946 |
| C | 2.6682298  | 1.3046823  | -1.4920126 |
| C | -0.8217155 | 3.7346691  | -1.6093177 |
| C | -1.8184140 | 4.4458515  | -1.6045723 |
| H | -0.7263617 | 1.1042987  | -1.0807352 |
| H | 1.6984060  | 4.5427888  | -2.0790181 |
| H | 1.3309723  | -0.3256973 | -0.9914197 |
| H | 3.7520450  | 3.1199073  | -1.9852617 |
| H | -2.6993109 | 5.0579129  | -1.6180568 |
| H | 3.5686166  | 0.6908629  | -1.4276059 |
| C | 1.8428776  | 1.8115450  | 1.9726971  |
| C | 0.8726997  | 0.8420296  | 2.3315250  |
| C | 1.4210728  | 3.1329925  | 1.6829048  |
| C | -0.4815420 | 1.1934799  | 2.4032927  |
| C | 0.0635603  | 3.4729349  | 1.7516416  |
| C | -0.8909560 | 2.5068083  | 2.1137199  |
| C | 3.2263608  | 1.4583239  | 1.8811555  |
| C | 4.4100107  | 1.1596485  | 1.7956547  |
| H | 1.1837110  | -0.1844808 | 2.5407435  |
| H | 2.1649156  | 3.8759449  | 1.3848587  |
| H | -1.2218739 | 0.4378248  | 2.6734374  |
| H | -0.2518097 | 4.4893956  | 1.4998238  |
| H | -1.9517338 | 2.7670245  | 2.1686943  |
| H | 5.4262148  | 0.8528078  | 1.6420168  |
| C | 4.0697471  | -1.8988205 | -0.6138266 |
| C | 3.3249649  | -1.9960760 | 0.5887439  |

|   |            |            |            |
|---|------------|------------|------------|
| C | 3.5336733  | -2.4496011 | -1.8054931 |
| C | 2.0843365  | -2.6469474 | 0.5966143  |
| C | 2.2908028  | -3.0973901 | -1.7851620 |
| C | 1.5661176  | -3.2052906 | -0.5856094 |
| C | 5.3458965  | -1.2488305 | -0.6366047 |
| C | 6.4358441  | -0.6925609 | -0.6771037 |
| H | 3.7205011  | -1.5412144 | 1.4991840  |
| H | 4.1004957  | -2.3612833 | -2.7365475 |
| H | 1.5087383  | -2.7103254 | 1.5242801  |
| H | 1.8843998  | -3.5166555 | -2.7110574 |
| H | 7.3994075  | -0.2219816 | -0.7132426 |
| H | 0.5929854  | -3.7021253 | -0.5747837 |
| C | -0.7506079 | -2.2480897 | 3.6180504  |
| C | -1.1018704 | -2.3793603 | 2.4531565  |
| C | -1.4580578 | -2.5546782 | 1.0779222  |
| C | -2.0297443 | -3.7752918 | 0.6381898  |
| C | -1.2074183 | -1.5291654 | 0.1333710  |
| C | -2.3305969 | -3.9631557 | -0.7183995 |
| C | -1.5105382 | -1.7276644 | -1.2178258 |
| C | -2.0704135 | -2.9409088 | -1.6493562 |
| H | -0.4670826 | -2.1135781 | 4.6439572  |
| H | -2.2233664 | -4.5678874 | 1.3661056  |
| H | -0.7629059 | -0.5939981 | 0.4725705  |
| H | -2.7667238 | -4.9111158 | -1.0492109 |
| H | -1.3163677 | -0.9321821 | -1.9389324 |
| H | -2.3097458 | -3.0888017 | -2.7066127 |
| C | -3.9635106 | 0.4310965  | 2.9350603  |
| C | -3.9990868 | 0.3839390  | 1.7129965  |
| C | -4.0528820 | 0.3208642  | 0.2840820  |
| C | -3.3728528 | 1.2792705  | -0.5087359 |
| C | -4.7897224 | -0.7068327 | -0.3560724 |
| C | -3.4352026 | 1.2099683  | -1.9069773 |
| C | -4.8461679 | -0.7669715 | -1.7543725 |
| C | -4.1726108 | 0.1903551  | -2.5342989 |
| H | -3.9200244 | 0.4703667  | 4.0060328  |
| H | -2.7894460 | 2.0679800  | -0.0284708 |
| H | -5.3024662 | -1.4555347 | 0.2536206  |
| H | -2.8960875 | 1.9546797  | -2.4989386 |
| H | -5.4126590 | -1.5693386 | -2.2376282 |
| H | -4.2189897 | 0.1391599  | -3.6269039 |

\*\*\*\*\*

#### Pentamer-09

|   |            |            |            |
|---|------------|------------|------------|
| C | -3.6978669 | -4.3668966 | 0.3996760  |
| C | -3.7661367 | -3.1554761 | 0.5633986  |
| C | -3.8104038 | -1.7390000 | 0.7656772  |
| C | -4.4264002 | -1.1963400 | 1.9222189  |
| C | -3.2187198 | -0.8633254 | -0.1780526 |
| C | -4.4470669 | 0.1912386  | 2.1242555  |
| C | -3.2450373 | 0.5205819  | 0.0344004  |
| C | -3.8579692 | 1.0542092  | 1.1810385  |



|   |            |            |            |
|---|------------|------------|------------|
| H | -3.6612272 | -5.4268082 | 0.2410404  |
| H | -4.8786948 | -1.8731272 | 2.6524362  |
| H | -2.7357741 | -1.2770272 | -1.0650179 |
| H | -4.9203848 | 0.5982959  | 3.0234479  |
| H | -2.7809252 | 1.1864213  | -0.6947672 |
| H | -3.8732375 | 2.1374722  | 1.3340533  |
| C | 0.5534951  | -4.5933307 | -1.4088912 |
| C | 0.1513037  | -3.4846939 | -1.7354398 |
| C | -0.3104055 | -2.1975310 | -2.1596922 |
| C | 0.1011858  | -1.0192133 | -1.4879354 |
| C | -1.1854081 | -2.0891565 | -3.2708683 |
| C | -0.3376909 | 0.2333759  | -1.9331051 |
| C | -1.6305754 | -0.8298253 | -3.6982553 |
| C | -1.2054225 | 0.3353709  | -3.0336924 |
| H | 0.8926993  | -5.5652365 | -1.1078017 |
| H | 0.7514454  | -1.0994753 | -0.6169656 |
| H | -1.5100461 | -2.9984415 | -3.7839740 |
| H | -0.0154205 | 1.1324101  | -1.4074523 |
| H | -2.3102296 | -0.7598477 | -4.5533052 |
| H | -1.5556740 | 1.3184950  | -3.3622728 |
| C | -0.2817731 | 2.4240713  | 3.6874585  |
| C | -0.0255646 | 1.3291186  | 3.2034597  |
| C | 0.2873479  | 0.0455096  | 2.6509192  |
| C | -0.7459887 | -0.8705248 | 2.3290437  |
| C | 1.6381068  | -0.3268474 | 2.4331711  |
| C | -0.4280497 | -2.1407463 | 1.8306675  |
| C | 1.9436797  | -1.5959552 | 1.9231602  |
| C | 0.9149416  | -2.5101302 | 1.6352393  |
| H | -0.5094694 | 3.3799566  | 4.1172761  |
| H | -1.7874592 | -0.5729468 | 2.4646400  |
| H | 2.4348349  | 0.3856881  | 2.6601768  |
| H | -1.2310363 | -2.8368953 | 1.5755063  |
| H | 2.9867251  | -1.8630889 | 1.7341263  |
| H | 1.1541866  | -3.4933553 | 1.2219961  |
| C | -3.7404224 | 3.9939339  | -1.0881094 |
| C | -2.5255966 | 3.8529337  | -1.0417124 |
| C | -1.1067028 | 3.6702658  | -0.9923137 |
| C | -0.4826362 | 3.1899221  | 0.1870695  |
| C | -0.3088481 | 3.9606440  | -2.1283770 |
| C | 0.9074774  | 3.0104506  | 0.2252402  |
| C | 1.0799385  | 3.7785185  | -2.0789661 |
| C | 1.6928768  | 3.3056191  | -0.9036906 |
| H | -4.8045156 | 4.1254350  | -1.1212150 |
| H | -1.0878801 | 2.9466492  | 1.0627120  |
| H | -0.7903687 | 4.3310990  | -3.0377037 |
| H | 1.3750066  | 2.6263112  | 1.1349587  |
| H | 1.6859679  | 4.0102127  | -2.9604284 |
| H | 2.7759760  | 3.1619315  | -0.8617297 |
| C | 4.2894492  | 2.6095805  | 1.5217785  |
| C | 4.3404696  | 1.5375630  | 0.9331566  |

|   |           |            |            |
|---|-----------|------------|------------|
| C | 4.3894765 | 0.2657043  | 0.2781618  |
| C | 5.3488305 | -0.6998800 | 0.6755748  |
| C | 3.4676597 | -0.0579583 | -0.7485076 |
| C | 5.3821521 | -1.9567976 | 0.0556035  |
| C | 3.5100284 | -1.3167522 | -1.3621761 |
| C | 4.4652354 | -2.2688008 | -0.9653384 |
| H | 4.2429308 | 3.5585746  | 2.0194376  |
| H | 6.0537412 | -0.4540117 | 1.4746861  |
| H | 2.7110762 | 0.6734749  | -1.0418998 |
| H | 6.1254069 | -2.6956447 | 0.3723924  |
| H | 2.7794460 | -1.5629264 | -2.1371242 |
| H | 4.4909320 | -3.2516616 | -1.4463969 |

\*\*\*\*\*

Pentamer-10 (P7)

|   |            |            |            |
|---|------------|------------|------------|
| C | 0.0701526  | -0.7355325 | 2.7603497  |
| C | -0.2470441 | -0.7872459 | 1.3809132  |
| C | -0.4660857 | 0.3113134  | 3.5529162  |
| C | -1.0692094 | 0.1878819  | 0.8093264  |
| C | -1.2983892 | 1.2784348  | 2.9697001  |
| C | -1.6002305 | 1.2220240  | 1.5970475  |
| C | 2.0510563  | 3.3919799  | 0.5688074  |
| C | 3.0638061  | 3.6086876  | -0.4006391 |
| C | 1.8774199  | 2.0931320  | 1.1074420  |
| C | 3.8672333  | 2.5425324  | -0.8302070 |
| C | 2.6903912  | 1.0379269  | 0.6751859  |
| C | 3.6817080  | 1.2524664  | -0.2976304 |
| C | 1.1979101  | 4.4670333  | 0.9772035  |
| C | 0.4483921  | 5.3802123  | 1.2983811  |
| C | 0.9195754  | -1.7287314 | 3.3454474  |
| C | 1.6534151  | -2.5739627 | 3.8425705  |
| H | 0.1494057  | -1.5907329 | 0.7592399  |
| H | -0.2172759 | 0.3565596  | 4.6166738  |
| H | -1.2971057 | 0.1325123  | -0.2537648 |
| H | -1.7022820 | 2.0847453  | 3.5895955  |
| H | 3.2005175  | 4.6118605  | -0.8142105 |
| H | 1.0936460  | 1.9166625  | 1.8451359  |
| H | 4.6380602  | 2.7201012  | -1.5872595 |
| H | 2.5398977  | 0.0400309  | 1.0915441  |
| H | 4.2998890  | 0.4173035  | -0.6390360 |
| H | -0.1849219 | 6.1905106  | 1.6035482  |
| H | 2.2796690  | -3.3201619 | 4.2914335  |
| H | -2.2403796 | 1.9811916  | 1.1403549  |
| C | -2.1589296 | 2.1585651  | -1.8169935 |
| C | -0.8342631 | 2.5994399  | -1.5685393 |
| C | -2.3641361 | 0.9611310  | -2.5490621 |
| C | 0.2547047  | 1.8493813  | -2.0335924 |
| C | -1.2672214 | 0.2220221  | -3.0099181 |
| C | 0.0434981  | 0.6611393  | -2.7527869 |
| C | -3.2770495 | 2.8881154  | -1.3002656 |
| C | -4.2319737 | 3.4885180  | -0.8233273 |

|   |            |            |            |
|---|------------|------------|------------|
| H | -0.6687224 | 3.5070454  | -0.9823378 |
| H | -3.3811197 | 0.6046792  | -2.7287666 |
| H | 1.2707318  | 2.1785728  | -1.8086526 |
| H | -1.4413039 | -0.7135035 | -3.5471527 |
| H | -5.0680975 | 4.0491095  | -0.4526983 |
| H | 0.8952257  | 0.0624984  | -3.0876609 |
| C | 0.0800613  | -2.7435926 | -1.7640844 |
| C | 1.2611991  | -2.6349715 | -1.4624061 |
| C | 2.6379596  | -2.4832034 | -1.1009697 |
| C | 3.0349298  | -2.5198357 | 0.2596349  |
| C | 3.6245616  | -2.2868992 | -2.1006325 |
| C | 4.3837862  | -2.3599952 | 0.6053704  |
| C | 4.9718521  | -2.1343991 | -1.7447805 |
| C | 5.3576773  | -2.1698643 | -0.3918313 |
| H | -0.9591050 | -2.8042639 | -2.0316271 |
| H | 2.2856204  | -2.6629706 | 1.0422666  |
| H | 3.3212769  | -2.2606665 | -3.1511451 |
| H | 4.6725145  | -2.3793794 | 1.6609059  |
| H | 5.7231731  | -1.9843469 | -2.5268067 |
| H | 6.4103707  | -2.0472571 | -0.1175416 |
| C | -3.4529514 | -2.7386336 | -3.1134895 |
| C | -3.5245221 | -2.4614761 | -1.9227056 |
| C | -3.5917174 | -2.1505088 | -0.5269535 |
| C | -2.9498933 | -2.9858369 | 0.4216045  |
| C | -4.3070500 | -1.0129475 | -0.0759810 |
| C | -3.0326387 | -2.6911357 | 1.7891392  |
| C | -4.3865525 | -0.7316618 | 1.2937331  |
| C | -3.7552376 | -1.5694275 | 2.2299143  |
| H | -3.4215464 | -2.9950255 | -4.1546978 |
| H | -2.3882249 | -3.8571629 | 0.0743298  |
| H | -4.7881841 | -0.3566890 | -0.8054129 |
| H | -2.5217731 | -3.3341904 | 2.5118948  |
| H | -4.9336328 | 0.1542053  | 1.6295485  |
| H | -3.8066007 | -1.3356968 | 3.2975525  |

\*\*\*\*\*

#### Pentamer-11

|   |            |            |            |
|---|------------|------------|------------|
| C | -0.1614003 | -3.1653470 | 0.1300393  |
| C | -0.3525014 | -1.7720652 | 0.2971541  |
| C | -0.0567121 | -3.6970102 | -1.1793338 |
| C | -0.4324025 | -0.9285072 | -0.8162773 |
| C | -0.1501623 | -2.8458132 | -2.2902397 |
| C | -0.3389267 | -1.4637509 | -2.1126674 |
| C | -3.6533174 | -0.7931293 | 0.0793853  |
| C | -3.3848110 | 0.1088795  | 1.1388402  |
| C | -3.6922739 | -2.1836873 | 0.3510873  |
| C | -3.1605586 | -0.3731100 | 2.4361136  |
| C | -3.4594092 | -2.6563954 | 1.6488589  |
| C | -3.1928905 | -1.7549519 | 2.6953441  |
| C | -3.8332359 | -0.3112962 | -1.2550894 |
| C | -3.9533966 | 0.0963247  | -2.4023334 |

|   |            |            |            |
|---|------------|------------|------------|
| C | -0.0668453 | -4.0203278 | 1.2742785  |
| C | 0.0404822  | -4.7388617 | 2.2597997  |
| H | -0.4539000 | -1.3798597 | 1.3089061  |
| H | 0.0944039  | -4.7718713 | -1.3110558 |
| H | -0.5800131 | 0.1456560  | -0.6857291 |
| H | -0.0748624 | -3.2639391 | -3.2988792 |
| H | -3.3309091 | 1.1815860  | 0.9373988  |
| H | -3.8764909 | -2.8816271 | -0.4698441 |
| H | -2.9449270 | 0.3382689  | 3.2388387  |
| H | -3.4640379 | -3.7333542 | 1.8415491  |
| H | -3.0022349 | -2.1296797 | 3.7058208  |
| H | -3.9695660 | 0.4615235  | -3.4110710 |
| H | 0.1175209  | -5.3768281 | 3.1187520  |
| H | -0.4233624 | -0.8059256 | -2.9796296 |
| C | -0.7545357 | 1.9771260  | -3.0530483 |
| C | -1.5260017 | 2.5850797  | -2.0301515 |
| C | 0.6440083  | 1.8343054  | -2.8709649 |
| C | -0.9029069 | 3.0546025  | -0.8659483 |
| C | 1.2564549  | 2.3049916  | -1.7028552 |
| C | 0.4883350  | 2.9252401  | -0.7029653 |
| C | -1.3728729 | 1.4972195  | -4.2520817 |
| C | -1.8850952 | 1.0712364  | -5.2797365 |
| H | -2.6079398 | 2.6685406  | -2.1529240 |
| H | 1.2389576  | 1.3347167  | -3.6389535 |
| H | -1.5044824 | 3.5068478  | -0.0719988 |
| H | 2.3329084  | 2.1669552  | -1.5711432 |
| H | -2.3293750 | 0.7207505  | -6.1912285 |
| H | 0.9670547  | 3.2866043  | 0.2098167  |
| C | -2.8803399 | 3.3405368  | 2.8677158  |
| C | -1.7036196 | 3.0122658  | 2.7901533  |
| C | -0.3299962 | 2.6283061  | 2.6618327  |
| C | 0.7066745  | 3.5292220  | 3.0135735  |
| C | 0.0095345  | 1.3520399  | 2.1485456  |
| C | 2.0483226  | 3.1545003  | 2.8492375  |
| C | 1.3515692  | 0.9855599  | 1.9901741  |
| C | 2.3745216  | 1.8841935  | 2.3390081  |
| H | -3.9127158 | 3.6188423  | 2.9569540  |
| H | 0.4482001  | 4.5173788  | 3.4040307  |
| H | -0.7917646 | 0.6735330  | 1.8555345  |
| H | 2.8415903  | 3.8595252  | 3.1178439  |
| H | 1.6044237  | 0.0075296  | 1.5744651  |
| H | 3.4195939  | 1.5943074  | 2.2016712  |
| C | 3.8242898  | 0.2205304  | -3.3809460 |
| C | 3.8533251  | -0.1746805 | -2.2230001 |
| C | 3.9168504  | -0.6414348 | -0.8704879 |
| C | 4.8670533  | -0.0916343 | 0.0284568  |
| C | 3.0463556  | -1.6638958 | -0.4162635 |
| C | 4.9471337  | -0.5634893 | 1.3456126  |
| C | 3.1371735  | -2.1303011 | 0.9029093  |
| C | 4.0850701  | -1.5843276 | 1.7865356  |

|   |           |            |            |
|---|-----------|------------|------------|
| H | 3.7930665 | 0.5660345  | -4.3959852 |
| H | 5.5380558 | 0.6984691  | -0.3207075 |
| H | 2.2988919 | -2.0782830 | -1.0960294 |
| H | 5.6853423 | -0.1335921 | 2.0305305  |
| H | 2.4562222 | -2.9142457 | 1.2445976  |
| H | 4.1484782 | -1.9486204 | 2.8166946  |

\*\*\*\*\*

Pentamer-12

|   |            |            |            |
|---|------------|------------|------------|
| C | 2.7715512  | 4.5292815  | 0.0515889  |
| C | 3.0752084  | 3.4212524  | -0.3698941 |
| C | 3.3839028  | 2.1030823  | -0.8356495 |
| C | 4.6614679  | 1.5293732  | -0.6113748 |
| C | 2.3918808  | 1.3418325  | -1.5031199 |
| C | 4.9274535  | 0.2184035  | -1.0333025 |
| C | 2.6674491  | 0.0330018  | -1.9175727 |
| C | 3.9310676  | -0.5355667 | -1.6810434 |
| H | 2.5059828  | 5.5033713  | 0.4134366  |
| H | 5.4267521  | 2.1132341  | -0.0927338 |
| H | 1.4100259  | 1.7816851  | -1.6770757 |
| H | 5.9111505  | -0.2214483 | -0.8416758 |
| H | 1.8905881  | -0.5547067 | -2.4120469 |
| H | 4.1268622  | -1.5669153 | -1.9884186 |
| C | -0.8915059 | 3.8756275  | 1.9338099  |
| C | -0.9027598 | 3.2566020  | 0.8781254  |
| C | -0.9422590 | 2.5419086  | -0.3608335 |
| C | -1.0115944 | 1.1271032  | -0.3759070 |
| C | -0.9316899 | 3.2491720  | -1.5894443 |
| C | -1.0741347 | 0.4389163  | -1.5928468 |
| C | -0.9947655 | 2.5508035  | -2.8033945 |
| C | -1.0676152 | 1.1453303  | -2.8079574 |
| H | -0.8470887 | 4.4172309  | 2.8585566  |
| H | -1.0224870 | 0.5776305  | 0.5648694  |
| H | -0.8685734 | 4.3403167  | -1.5776975 |
| H | -1.1270697 | -0.6499077 | -1.5932464 |
| H | -0.9802377 | 3.1045496  | -3.7472100 |
| H | -1.1112005 | 0.6022503  | -3.7570027 |
| C | 4.2943197  | -3.1516285 | 2.0966038  |
| C | 3.4830238  | -2.2752852 | 2.3647560  |
| C | 2.5133464  | -1.2589345 | 2.6411898  |
| C | 2.4258445  | -0.1156487 | 1.8075880  |
| C | 1.6124124  | -1.3928296 | 3.7284503  |
| C | 1.4541685  | 0.8630414  | 2.0502973  |
| C | 0.6397582  | -0.4092793 | 3.9598207  |
| C | 0.5544022  | 0.7171597  | 3.1205759  |
| H | 5.0156210  | -3.9148063 | 1.8771197  |
| H | 3.1127111  | -0.0139392 | 0.9670305  |
| H | 1.6776483  | -2.2740926 | 4.3724436  |
| H | 1.3933650  | 1.7372842  | 1.3983491  |
| H | -0.0566514 | -0.5258381 | 4.7965187  |
| H | -0.2134805 | 1.4778377  | 3.2875802  |

|   |            |            |            |
|---|------------|------------|------------|
| C | 2.3327675  | -3.4482887 | -3.3769933 |
| C | 1.4636888  | -3.2749900 | -2.5324335 |
| C | 0.4416820  | -3.0391569 | -1.5572486 |
| C | 0.7629011  | -2.4533366 | -0.3066676 |
| C | -0.9087834 | -3.3736591 | -1.8395474 |
| C | -0.2468143 | -2.2050534 | 0.6328630  |
| C | -1.9098199 | -3.1221249 | -0.8910767 |
| C | -1.5816574 | -2.5374557 | 0.3458598  |
| H | 3.0966388  | -3.6191078 | -4.1106209 |
| H | 1.7982860  | -2.1909433 | -0.0829565 |
| H | -1.1562757 | -3.8230785 | -2.8054260 |
| H | 0.0108675  | -1.7407627 | 1.5863716  |
| H | -2.9527792 | -3.3663512 | -1.1115391 |
| H | -2.3729754 | -2.3311543 | 1.0704220  |
| C | -5.2947046 | -3.1857450 | 0.5953627  |
| C | -5.0435192 | -1.9928318 | 0.4835865  |
| C | -4.7301080 | -0.6013714 | 0.3607090  |
| C | -4.3217246 | 0.1442679  | 1.4964684  |
| C | -4.8240476 | 0.0509217  | -0.8943228 |
| C | -4.0297413 | 1.5089962  | 1.3757875  |
| C | -4.5302858 | 1.4168591  | -1.0031597 |
| C | -4.1383682 | 2.1499704  | 0.1292489  |
| H | -5.5275802 | -4.2282055 | 0.6963296  |
| H | -4.2413002 | -0.3587828 | 2.4643912  |
| H | -5.1262727 | -0.5245239 | -1.7736760 |
| H | -3.6986306 | 2.0756734  | 2.2508883  |
| H | -4.5914297 | 1.9075853  | -1.9790584 |
| H | -3.8848580 | 3.2094524  | 0.0390972  |

\*\*\*\*\*

#### Pentamer-13

|   |            |            |            |
|---|------------|------------|------------|
| C | -0.6965678 | 0.4420984  | 3.0019339  |
| C | -0.0074694 | 0.3704416  | 1.7665601  |
| C | -0.8372338 | -0.7341251 | 3.7834165  |
| C | 0.5118697  | -0.8499661 | 1.3195728  |
| C | -0.3058585 | -1.9495083 | 3.3276052  |
| C | 0.3655667  | -2.0142740 | 2.0919937  |
| C | -3.4458744 | -2.3457699 | -0.0765067 |
| C | -4.1346814 | -2.1013946 | -1.2919609 |
| C | -2.9353522 | -1.2492696 | 0.6611767  |
| C | -4.2973446 | -0.7886359 | -1.7575811 |
| C | -3.1116530 | 0.0579330  | 0.1904357  |
| C | -3.7868573 | 0.2958365  | -1.0193000 |
| C | -3.2476089 | -3.6868150 | 0.3848119  |
| C | -3.0496200 | -4.8363838 | 0.7561216  |
| C | -1.2484711 | 1.6851094  | 3.4510515  |
| C | -1.7282200 | 2.7472555  | 3.8266744  |
| H | 0.1144076  | 1.2675205  | 1.1575877  |
| H | -1.3669448 | -0.6807086 | 4.7384475  |
| H | 1.0244076  | -0.8880291 | 0.3588359  |
| H | -0.4278740 | -2.8518205 | 3.9346852  |

|   |            |            |            |
|---|------------|------------|------------|
| H | -4.5262228 | -2.9480638 | -1.8627487 |
| H | -2.3861719 | -1.4333662 | 1.5856023  |
| H | -4.8198131 | -0.6132233 | -2.7033849 |
| H | -2.7078026 | 0.8945923  | 0.7641723  |
| H | -3.9030265 | 1.3193506  | -1.3855160 |
| H | -2.8971434 | -5.8434890 | 1.0926000  |
| H | -2.1291127 | 3.6784207  | 4.1775139  |
| H | 0.7567854  | -2.9666185 | 1.7226859  |
| C | 1.1924664  | -3.1080892 | -1.2681800 |
| C | -0.1761004 | -2.7724803 | -1.4226629 |
| C | 2.1837839  | -2.1839347 | -1.6872343 |
| C | -0.5393719 | -1.5347810 | -1.9707894 |
| C | 1.8085099  | -0.9509195 | -2.2382772 |
| C | 0.4480883  | -0.6216559 | -2.3792809 |
| C | 1.5701201  | -4.3505889 | -0.6641280 |
| C | 1.8927300  | -5.3969963 | -0.1166457 |
| H | -0.9414322 | -3.4733543 | -1.0814745 |
| H | 3.2414051  | -2.4283805 | -1.5606465 |
| H | -1.5966116 | -1.2729230 | -2.0514671 |
| H | 2.5853230  | -0.2431729 | -2.5389805 |
| H | 2.1769514  | -6.3327304 | 0.3248033  |
| H | 0.1622829  | 0.3557247  | -2.7775366 |
| C | 1.4871716  | 2.4720285  | -0.9033640 |
| C | 0.3192146  | 2.8155417  | -1.0219216 |
| C | -1.0506134 | 3.2165606  | -1.1335246 |
| C | -1.8348648 | 3.4151821  | 0.0313345  |
| C | -1.6407172 | 3.4305422  | -2.4052153 |
| C | -3.1704193 | 3.8245824  | -0.0790406 |
| C | -2.9766420 | 3.8438889  | -2.5044358 |
| C | -3.7460937 | 4.0457600  | -1.3437459 |
| H | 2.5070801  | 2.1637030  | -0.7715811 |
| H | -1.3950254 | 3.2409478  | 1.0169937  |
| H | -1.0382231 | 3.2781282  | -3.3052838 |
| H | -3.7655846 | 3.9673479  | 0.8284168  |
| H | -3.4189282 | 4.0100439  | -3.4921257 |
| H | -4.7888994 | 4.3688143  | -1.4248426 |
| C | 5.5827193  | -0.8302611 | -2.3292206 |
| C | 5.1986160  | -0.1281437 | -1.4033515 |
| C | 4.7503316  | 0.6949113  | -0.3210260 |
| C | 5.1644254  | 2.0494517  | -0.2320091 |
| C | 3.8886261  | 0.1699332  | 0.6755202  |
| C | 4.7296294  | 2.8512854  | 0.8331487  |
| C | 3.4631314  | 0.9792905  | 1.7380494  |
| C | 3.8815668  | 2.3191549  | 1.8220057  |
| H | 5.9254351  | -1.4521647 | -3.1335819 |
| H | 5.8243980  | 2.4574145  | -1.0025748 |
| H | 3.5498016  | -0.8656205 | 0.5996125  |
| H | 5.0502772  | 3.8961967  | 0.8879716  |
| H | 2.7867561  | 0.5651827  | 2.4898609  |
| H | 3.5393803  | 2.9499736  | 2.6482425  |

\*\*\*\*\*

Pentamer-14

|   |            |            |            |
|---|------------|------------|------------|
| C | -0.6965872 | 0.4420878  | 3.0018906  |
| C | -0.0074780 | 0.3704428  | 1.7665075  |
| C | -0.8372259 | -0.7341277 | 3.7833623  |
| C | 0.5118636  | -0.8499760 | 1.3195313  |
| C | -0.3058668 | -1.9494904 | 3.3275772  |
| C | 0.3655536  | -2.0142812 | 2.0919607  |
| C | -3.4458294 | -2.3457485 | -0.0765057 |
| C | -4.1346553 | -2.1013656 | -1.2919463 |
| C | -2.9353018 | -1.2492437 | 0.6611657  |
| C | -4.2973153 | -0.7886251 | -1.7575666 |
| C | -3.1116148 | 0.0579460  | 0.1904383  |
| C | -3.7868333 | 0.2958564  | -1.0192931 |
| C | -3.2475670 | -3.6868013 | 0.3848177  |
| C | -3.0495963 | -4.8363729 | 0.7561045  |
| C | -1.2484877 | 1.6851048  | 3.4510024  |
| C | -1.7282374 | 2.7472439  | 3.8266509  |
| H | 0.1144049  | 1.2675053  | 1.1575471  |
| H | -1.3669340 | -0.6806860 | 4.7384184  |
| H | 1.0244018  | -0.8880158 | 0.3587975  |
| H | -0.4278785 | -2.8518135 | 3.9346809  |
| H | -4.5262086 | -2.9480480 | -1.8627128 |
| H | -2.3860872 | -1.4333527 | 1.5855722  |
| H | -4.8197738 | -0.6132285 | -2.7033932 |
| H | -2.7077545 | 0.8946108  | 0.7641843  |
| H | -3.9030038 | 1.3193617  | -1.3855118 |
| H | -2.8971636 | -5.8434824 | 1.0925890  |
| H | -2.1291035 | 3.6784032  | 4.1775242  |
| H | 0.7567595  | -2.9666228 | 1.7226453  |
| C | 1.1924599  | -3.1080773 | -1.2681441 |
| C | -0.1761111 | -2.7724550 | -1.4226395 |
| C | 2.1837750  | -2.1839038 | -1.6871999 |
| C | -0.5393741 | -1.5347670 | -1.9707402 |
| C | 1.8084968  | -0.9509076 | -2.2382416 |
| C | 0.4480781  | -0.6216370 | -2.3792455 |
| C | 1.5701121  | -4.3505753 | -0.6641052 |
| C | 1.8927269  | -5.3969713 | -0.1166089 |
| H | -0.9414310 | -3.4733535 | -1.0814628 |
| H | 3.2413851  | -2.4283561 | -1.5605970 |
| H | -1.5966322 | -1.2728992 | -2.0513849 |
| H | 2.5853251  | -0.2431559 | -2.5389402 |
| H | 2.1769497  | -6.3327308 | 0.3247868  |
| H | 0.1622711  | 0.3557354  | -2.7775030 |
| C | 1.4871689  | 2.4719924  | -0.9033413 |
| C | 0.3192103  | 2.8154933  | -1.0219162 |
| C | -1.0506163 | 3.2165163  | -1.1335276 |
| C | -1.8348702 | 3.4151388  | 0.0313404  |
| C | -1.6407315 | 3.4305224  | -2.4052052 |
| C | -3.1704031 | 3.8245546  | -0.0790244 |



|   |            |            |            |
|---|------------|------------|------------|
| C | -2.9766150 | 3.8438689  | -2.5044324 |
| C | -3.7460982 | 4.0457486  | -1.3437431 |
| H | 2.5070796  | 2.1637032  | -0.7715166 |
| H | -1.3950219 | 3.2408875  | 1.0169893  |
| H | -1.0382088 | 3.2781145  | -3.3052771 |
| H | -3.7655636 | 3.9673285  | 0.8284387  |
| H | -3.4189079 | 4.0100357  | -3.4921366 |
| H | -4.7888773 | 4.3688062  | -1.4248335 |
| C | 5.5826987  | -0.8302628 | -2.3292368 |
| C | 5.1985783  | -0.1281415 | -1.4033728 |
| C | 4.7502898  | 0.6949170  | -0.3210415 |
| C | 5.1643981  | 2.0494504  | -0.2320167 |
| C | 3.8885814  | 0.1699426  | 0.6754972  |
| C | 4.7296120  | 2.8512765  | 0.8331477  |
| C | 3.4631041  | 0.9792905  | 1.7380265  |
| C | 3.8815518  | 2.3191400  | 1.8219980  |
| H | 5.9254510  | -1.4521685 | -3.1335687 |
| H | 5.8243783  | 2.4574026  | -1.0025767 |
| H | 3.5497471  | -0.8656096 | 0.5995717  |
| H | 5.0502734  | 3.8961950  | 0.8879587  |
| H | 2.7867120  | 0.5651632  | 2.4898391  |
| H | 3.5393749  | 2.9499583  | 2.6482452  |

\*\*\*\*\*

#### Pentamer-15 (P8)

|   |            |            |            |
|---|------------|------------|------------|
| C | 0.5799105  | 2.6251027  | 1.7902397  |
| C | 0.1053059  | 1.3487228  | 1.3969160  |
| C | -0.3490082 | 3.6780054  | 1.9802679  |
| C | -1.2637342 | 1.1375608  | 1.1877163  |
| C | -1.7161994 | 3.4575272  | 1.7628609  |
| C | -2.1779456 | 2.1910667  | 1.3640936  |
| C | -0.7686401 | 2.0473055  | -2.0790578 |
| C | -0.1649196 | 0.7734202  | -2.2281891 |
| C | 0.0322939  | 3.1480279  | -1.6837804 |
| C | 1.2062220  | 0.6102609  | -1.9846806 |
| C | 1.4005266  | 2.9734642  | -1.4441880 |
| C | 1.9922591  | 1.7074439  | -1.5927356 |
| C | -2.1707818 | 2.2270360  | -2.3006806 |
| C | -3.3684458 | 2.4045563  | -2.4796767 |
| C | 1.9842050  | 2.8547513  | 1.9452833  |
| C | 3.1889475  | 3.0528709  | 2.0315183  |
| H | 0.8327112  | 0.5524986  | 1.2254235  |
| H | 0.0155021  | 4.6638111  | 2.2833047  |
| H | -1.6308981 | 0.1585382  | 0.8700846  |
| H | -2.4250293 | 4.2809407  | 1.8988786  |
| H | -0.7757160 | -0.0850214 | -2.5188810 |
| H | -0.4371621 | 4.1258453  | -1.5491178 |
| H | 1.6570577  | -0.3809979 | -2.0850362 |
| H | 2.0062305  | 3.8205399  | -1.1102643 |
| H | 3.0559967  | 1.5784530  | -1.3845154 |
| H | -4.4288349 | 2.5301891  | -2.5779438 |

|   |            |            |            |
|---|------------|------------|------------|
| H | 4.2506816  | 3.1986605  | 2.0707324  |
| H | -3.2411394 | 2.0314511  | 1.1717721  |
| C | -4.6699703 | -0.2352100 | 0.2157904  |
| C | -3.9231486 | -0.7175550 | -0.8888953 |
| C | -4.6242766 | -0.9443918 | 1.4426658  |
| C | -3.1617999 | -1.8868788 | -0.7667425 |
| C | -3.8584973 | -2.1135972 | 1.5526737  |
| C | -3.1303241 | -2.5913456 | 0.4496162  |
| C | -5.4553201 | 0.9570075  | 0.1031961  |
| C | -6.1204760 | 1.9818193  | 0.0269571  |
| H | -3.9301783 | -0.1562866 | -1.8250659 |
| H | -5.1913678 | -0.5680470 | 2.2986827  |
| H | -2.5769706 | -2.2444015 | -1.6189720 |
| H | -3.8266023 | -2.6516616 | 2.5055102  |
| H | -6.7114313 | 2.8746890  | -0.0405008 |
| H | -2.5202018 | -3.4935690 | 0.5430504  |
| C | 0.1986197  | -2.7325396 | -3.3185530 |
| C | 0.1762761  | -2.9461987 | -2.1138262 |
| C | 0.1413781  | -3.1731816 | -0.7013808 |
| C | 0.1653387  | -4.4908460 | -0.1786815 |
| C | 0.0774844  | -2.0772642 | 0.1917154  |
| C | 0.1326576  | -4.6968304 | 1.2080134  |
| C | 0.0362934  | -2.2928365 | 1.5737977  |
| C | 0.0686099  | -3.5992896 | 2.0880651  |
| H | 0.2261176  | -2.5360582 | -4.3730491 |
| H | 0.2107155  | -5.3401233 | -0.8658942 |
| H | 0.0556045  | -1.0672340 | -0.2147249 |
| H | 0.1537992  | -5.7169987 | 1.6038219  |
| H | -0.0276414 | -1.4359516 | 2.2487153  |
| H | 0.0388483  | -3.7667509 | 3.1690546  |
| C | 6.0050802  | 2.2695326  | -0.3303717 |
| C | 5.4211936  | 1.2101435  | -0.1424817 |
| C | 4.7139471  | -0.0189748 | 0.0556756  |
| C | 4.5771355  | -0.9448695 | -1.0097172 |
| C | 4.1241316  | -0.3173078 | 1.3097430  |
| C | 3.8743345  | -2.1429292 | -0.8181811 |
| C | 3.4286531  | -1.5194177 | 1.4899985  |
| C | 3.3030135  | -2.4366594 | 0.4319533  |
| H | 6.5362455  | 3.1868710  | -0.4960362 |
| H | 5.0209316  | -0.7097254 | -1.9811507 |
| H | 4.2016357  | 0.4059688  | 2.1242512  |
| H | 3.7632655  | -2.8450542 | -1.6501635 |
| H | 2.9652878  | -1.7375958 | 2.4566853  |
| H | 2.7421730  | -3.3635213 | 0.5768205  |

\*\*\*\*\*

#### Pentamer-16

|   |            |            |           |
|---|------------|------------|-----------|
| C | -3.0316773 | -1.5365306 | 2.0097037 |
| C | -2.2334122 | -0.7402237 | 1.1717827 |
| C | -3.4692434 | -2.7983662 | 1.5675110 |
| H | -1.8975373 | 0.2410651  | 1.5118242 |

|   |            |            |            |
|---|------------|------------|------------|
| H | -4.0921653 | -3.4230186 | 2.2163123  |
| C | -1.8709972 | -1.1955151 | -0.1002439 |
| C | -3.1129415 | -3.2630708 | 0.2934243  |
| H | -1.2546552 | -0.5841834 | -0.7576897 |
| H | -3.4511641 | -4.2428051 | -0.0557751 |
| C | -2.3072760 | -2.4626917 | -0.5546391 |
| H | -3.3130404 | -1.1748234 | 3.0033220  |
| C | -1.9413306 | -2.9299034 | -1.8577836 |
| C | -1.6313888 | -3.3344365 | -2.9711685 |
| H | -1.3775660 | -3.6937386 | -3.9495241 |
| C | 1.0756312  | -1.5901088 | 2.0675487  |
| C | 1.9772078  | -1.3810610 | 0.9940429  |
| C | 0.3000829  | -2.7761068 | 2.1025751  |
| H | 2.5722194  | -0.4672821 | 0.9636682  |
| H | -0.4117868 | -2.9272121 | 2.9171384  |
| C | 2.0842148  | -2.3311831 | -0.0298642 |
| C | 0.4165017  | -3.7198084 | 1.0754115  |
| H | 2.7734629  | -2.1503324 | -0.8586256 |
| H | -0.2032031 | -4.6208925 | 1.0976054  |
| C | 1.3029896  | -3.4991223 | 0.0054400  |
| H | 1.3720791  | -4.2306932 | -0.8054346 |
| C | 0.9228814  | -0.5923579 | 3.0832960  |
| C | 0.7601268  | 0.2887197  | 3.9180872  |
| H | 0.6540879  | 1.0311172  | 4.6848555  |
| C | 3.6910220  | 1.9879376  | 0.1674046  |
| C | 3.9218205  | 1.1490741  | -0.9313418 |
| C | 4.2975564  | 1.7148315  | 1.4060843  |
| H | 3.4316858  | 1.3420442  | -1.8877421 |
| H | 4.1007093  | 2.3609033  | 2.2669910  |
| C | 4.7667575  | 0.0186138  | -0.8017146 |
| C | 5.1426931  | 0.5981508  | 1.5421406  |
| H | 5.6095565  | 0.3774474  | 2.5070484  |
| C | 5.3792680  | -0.2469140 | 0.4493804  |
| H | 3.0178853  | 2.8422305  | 0.0604013  |
| H | 6.0238017  | -1.1239211 | 0.5539374  |
| C | 4.9783144  | -0.8585515 | -1.9134719 |
| C | 5.1346998  | -1.6263649 | -2.8539975 |
| H | 5.2968341  | -2.2846810 | -3.6854879 |
| C | -3.7775667 | 3.1906730  | 2.3387203  |
| C | -3.8157598 | 2.6274247  | 1.2521242  |
| C | -3.8210628 | 1.9336629  | -0.0001437 |
| C | -4.7966051 | 0.9408452  | -0.2695791 |
| C | -2.8218880 | 2.2026518  | -0.9677040 |
| C | -4.7588146 | 0.2254732  | -1.4728266 |
| C | -2.7912100 | 1.4778726  | -2.1661842 |
| C | -3.7539913 | 0.4861624  | -2.4215918 |
| H | -3.7728536 | 3.7109810  | 3.2767701  |
| H | -5.5610502 | 0.7247589  | 0.4816267  |
| H | -2.0650459 | 2.9613110  | -0.7591402 |
| H | -5.5035846 | -0.5536662 | -1.6621943 |

|   |            |            |            |
|---|------------|------------|------------|
| H | -1.9939218 | 1.6684455  | -2.8896562 |
| H | -3.7089439 | -0.0977426 | -3.3457886 |
| C | 0.7347766  | -0.3180025 | -2.7222144 |
| C | 0.6673753  | 0.6767262  | -2.0148672 |
| C | 0.5539557  | 1.8086868  | -1.1492494 |
| C | 0.3329357  | 1.6169554  | 0.2365257  |
| C | 0.6520716  | 3.1271773  | -1.6570664 |
| C | 0.1982043  | 2.7172413  | 1.0900663  |
| C | 0.5214474  | 4.2248534  | -0.7934625 |
| C | 0.2897125  | 4.0246660  | 0.5807521  |
| H | 0.7730578  | -1.2140202 | -3.3094549 |
| H | 0.2768059  | 0.6052849  | 0.6339750  |
| H | 0.8249613  | 3.2788260  | -2.7260064 |
| H | 0.0227124  | 2.5453948  | 2.1550334  |
| H | 0.5944212  | 5.2401544  | -1.1950951 |
| H | 0.1772907  | 4.8849509  | 1.2473051  |

\*\*\*\*\*

#### Pentamer-17

|   |            |            |            |
|---|------------|------------|------------|
| C | -0.7189865 | -3.4700739 | 0.3263866  |
| C | -1.6872862 | -3.6060666 | 1.3373774  |
| C | -1.0292352 | -2.7735080 | -0.8541263 |
| H | -1.4429315 | -4.1339846 | 2.2643174  |
| H | -0.2705704 | -2.6295716 | -1.6286442 |
| C | -2.9653854 | -3.0580405 | 1.1701527  |
| C | -2.3095386 | -2.2320387 | -1.0365017 |
| H | -3.7138925 | -3.1424532 | 1.9611621  |
| H | -2.5545196 | -1.6868704 | -1.9483376 |
| C | -3.2930788 | -2.3697296 | -0.0251927 |
| H | 0.2757283  | -3.9013977 | 0.4668211  |
| C | -4.5988766 | -1.8108270 | -0.2046653 |
| C | -5.7152213 | -1.3329942 | -0.3572914 |
| H | -6.6957199 | -0.9216267 | -0.4990242 |
| C | -0.7110230 | 0.4679960  | -2.4735834 |
| C | -1.5312178 | 1.0892298  | -1.4997443 |
| C | -1.2944837 | 0.0245740  | -3.6873000 |
| H | -1.0831381 | 1.4489723  | -0.5736270 |
| H | -0.6622745 | -0.4536390 | -4.4408104 |
| C | -2.9054546 | 1.2342149  | -1.7244817 |
| C | -2.6699233 | 0.1865796  | -3.9087094 |
| H | -3.5305845 | 1.6930827  | -0.9534621 |
| H | -3.1119560 | -0.1645008 | -4.8466332 |
| C | -3.4810360 | 0.7829662  | -2.9252343 |
| H | -4.5575793 | 0.8848942  | -3.0912063 |
| C | 0.6821000  | 0.2670343  | -2.2169800 |
| C | 1.8624908  | 0.0671142  | -1.9669942 |
| H | 2.8922501  | -0.1028254 | -1.7216171 |
| C | 0.6883488  | 3.7715686  | -1.1903751 |
| C | 1.0360015  | 3.2543347  | 0.0836684  |
| C | -0.5786566 | 4.3298190  | -1.4038203 |
| H | -0.8390651 | 4.7160445  | -2.3940412 |

|   |            |            |            |
|---|------------|------------|------------|
| C | 0.0812008  | 3.3024215  | 1.1308352  |
| C | -1.5191511 | 4.3772520  | -0.3591677 |
| H | 0.3352896  | 2.8890683  | 2.1085574  |
| H | -2.5118615 | 4.8039836  | -0.5340970 |
| C | -1.1857760 | 3.8587739  | 0.9045303  |
| H | 1.4167608  | 3.7166545  | -2.0034450 |
| H | -1.9174044 | 3.8779549  | 1.7181651  |
| C | 2.3338062  | 2.6878273  | 0.2933315  |
| C | 3.4473408  | 2.2009912  | 0.4373398  |
| H | 4.4262803  | 1.7714627  | 0.5492191  |
| C | -4.1767048 | -0.1142606 | 2.9458971  |
| C | -2.9583336 | -0.0016243 | 2.9383528  |
| C | -1.5337012 | 0.1340347  | 2.8945976  |
| C | -0.8096464 | 0.5826903  | 4.0283021  |
| C | -0.8296257 | -0.1732726 | 1.7035386  |
| C | 0.5849193  | 0.7183273  | 3.9641809  |
| C | 0.5596092  | -0.0132636 | 1.6418544  |
| C | 1.2711215  | 0.4267502  | 2.7712572  |
| H | -5.2419652 | -0.2353393 | 2.9288840  |
| H | -1.3501694 | 0.8215990  | 4.9486156  |
| H | -1.3825595 | -0.5275675 | 0.8336680  |
| H | 1.1352564  | 1.0672333  | 4.8440458  |
| H | 1.0813409  | -0.2018125 | 0.7013483  |
| H | 2.3510331  | 0.5824849  | 2.7108763  |
| C | 6.8434343  | 0.5010836  | 0.4514376  |
| C | 5.9776261  | -0.3112937 | 0.1529228  |
| C | 4.9387290  | -1.2349629 | -0.1896506 |
| C | 3.8597513  | -1.4583575 | 0.7023678  |
| C | 4.9697546  | -1.9346027 | -1.4235897 |
| C | 2.8392592  | -2.3563004 | 0.3659671  |
| C | 3.9439201  | -2.8330296 | -1.7491186 |
| C | 2.8766788  | -3.0451305 | -0.8582635 |
| H | 7.6187255  | 1.1949136  | 0.7145977  |
| H | 3.8271854  | -0.9169415 | 1.6502066  |
| H | 5.7989538  | -1.7624801 | -2.1152287 |
| H | 2.0048720  | -2.4985306 | 1.0563666  |
| H | 3.9733829  | -3.3621996 | -2.7065998 |
| H | 2.0713145  | -3.7350171 | -1.1258831 |

\*\*\*\*\*

#### Pentamer-18 (P9)

|   |           |           |            |
|---|-----------|-----------|------------|
| C | 4.3247198 | 0.5023996 | -0.5057926 |
| C | 3.9169637 | 1.3376301 | -1.5597040 |
| C | 4.0716069 | 0.8800592 | 0.8243405  |
| H | 4.0861541 | 1.0339185 | -2.5962196 |
| H | 4.3839303 | 0.2284972 | 1.6464664  |
| C | 3.2607376 | 2.5446542 | -1.2903378 |
| C | 3.4133539 | 2.0840182 | 1.1066429  |
| H | 2.9307523 | 3.1903267 | -2.1085938 |
| H | 3.1966305 | 2.3734006 | 2.1376741  |
| C | 3.0036291 | 2.9334222 | 0.0483149  |

|   |            |            |            |
|---|------------|------------|------------|
| H | 4.8072457  | -0.4547372 | -0.7205346 |
| C | 2.3355675  | 4.1672128  | 0.3335523  |
| C | 1.7560581  | 5.2144305  | 0.5947481  |
| H | 1.2696598  | 6.1420909  | 0.8273836  |
| C | 1.7488790  | -1.3517873 | -1.5660754 |
| C | 1.7033315  | -1.1653817 | -2.9693817 |
| C | 1.0505130  | -0.4523342 | -0.7266784 |
| H | 2.2260080  | -1.8708188 | -3.6200968 |
| H | 1.0670523  | -0.6025833 | 0.3505576  |
| C | 0.9791011  | -0.0941426 | -3.5116190 |
| C | 0.3321046  | 0.6120520  | -1.2758360 |
| H | 0.9447172  | 0.0385467  | -4.5978711 |
| H | -0.2038210 | 1.2938083  | -0.6158512 |
| C | 0.2945502  | 0.7991060  | -2.6674909 |
| H | -0.2746276 | 1.6342384  | -3.0869492 |
| C | 2.4984063  | -2.4295003 | -0.9971228 |
| C | 3.1574916  | -3.3336793 | -0.5000966 |
| H | 3.7129189  | -4.1499472 | -0.0811099 |
| C | -2.0533818 | -1.5321580 | 0.5385102  |
| C | -1.1839463 | -2.6088886 | 0.7826584  |
| C | -2.4626043 | -1.2424701 | -0.7737800 |
| H | -0.8487019 | -2.8199655 | 1.8004582  |
| H | -3.1268078 | -0.3962501 | -0.9644698 |
| C | -0.7210837 | -3.3957772 | -0.2791132 |
| C | -2.0032419 | -2.0222560 | -1.8427800 |
| H | -0.0218314 | -4.2162089 | -0.1009659 |
| H | -2.3003360 | -1.7895938 | -2.8687559 |
| C | -1.1237760 | -3.1082652 | -1.6078219 |
| H | -2.3923544 | -0.9048485 | 1.3663098  |
| C | -0.6306225 | -3.8933121 | -2.6983794 |
| C | -0.1942665 | -4.5564177 | -3.6302668 |
| H | 0.1755669  | -5.1498038 | -4.4436605 |
| C | 0.1005917  | 2.0874673  | 2.0186830  |
| C | 0.1408456  | 0.9837284  | 2.5444301  |
| C | 0.2191748  | -0.3140597 | 3.1424413  |
| C | 1.3727000  | -1.1173030 | 2.9555510  |
| C | -0.8557126 | -0.8215469 | 3.9143862  |
| C | 1.4405392  | -2.3974607 | 3.5208528  |
| C | -0.7772407 | -2.1015075 | 4.4799878  |
| C | 0.3690788  | -2.8943832 | 4.2849865  |
| H | 0.0866350  | 3.0381701  | 1.5184611  |
| H | 2.2003135  | -0.7321459 | 2.3549641  |
| H | -1.7470671 | -0.2044739 | 4.0582802  |
| H | 2.3300421  | -3.0132617 | 3.3565411  |
| H | -1.6151716 | -2.4848860 | 5.0705583  |
| H | 0.4226999  | -3.8966555 | 4.7211298  |
| C | -1.0500503 | 3.9130470  | -1.0486122 |
| C | -2.0461099 | 3.2526246  | -0.7848397 |
| C | -3.1967952 | 2.4558882  | -0.4840251 |
| C | -4.1976078 | 2.2382877  | -1.4648541 |

|   |            |           |            |
|---|------------|-----------|------------|
| C | -3.3437316 | 1.8633840 | 0.7959540  |
| C | -5.3163555 | 1.4474655 | -1.1680153 |
| C | -4.4688203 | 1.0789427 | 1.0827877  |
| C | -5.4572082 | 0.8663753 | 0.1056082  |
| H | -0.1415924 | 4.4547439 | -1.2325398 |
| H | -4.0834663 | 2.6905323 | -2.4539241 |
| H | -2.5599370 | 2.0059638 | 1.5438359  |
| H | -6.0797720 | 1.2801147 | -1.9343390 |
| H | -4.5682224 | 0.6179542 | 2.0705312  |
| H | -6.3288598 | 0.2443873 | 0.3310813  |

\*\*\*\*\*

Pentamer-19

|   |            |            |            |
|---|------------|------------|------------|
| C | -0.3241154 | 2.4884455  | 2.4908299  |
| C | 0.5068792  | 3.4738659  | 1.9292448  |
| C | -1.3742683 | 1.9446984  | 1.7316728  |
| H | 1.3354502  | 3.8895601  | 2.5097964  |
| H | -2.0248042 | 1.1763238  | 2.1592036  |
| C | 0.2990166  | 3.9081383  | 0.6146124  |
| C | -1.5926899 | 2.3713901  | 0.4151605  |
| H | 0.9597446  | 4.6542018  | 0.1661109  |
| H | -2.3965207 | 1.9407805  | -0.1823413 |
| C | -0.7510810 | 3.3546036  | -0.1603257 |
| H | -0.1376169 | 2.1302129  | 3.5070489  |
| C | -0.9355147 | 3.7598995  | -1.5212821 |
| C | -1.0625759 | 4.0729588  | -2.6988792 |
| H | -1.1970594 | 4.3967217  | -3.7128345 |
| C | 2.4125154  | 0.7914928  | 1.1198233  |
| C | 3.5371889  | 1.6428689  | 1.2530588  |
| C | 1.6895693  | 0.7878888  | -0.0957347 |
| H | 4.1083087  | 1.6333375  | 2.1847817  |
| H | 0.8354930  | 0.1253282  | -0.2175857 |
| C | 3.9167512  | 2.4761392  | 0.1929677  |
| C | 2.0728741  | 1.6267611  | -1.1464496 |
| H | 4.7907297  | 3.1263094  | 0.3028079  |
| H | 1.4929139  | 1.6176977  | -2.0725707 |
| C | 3.1837599  | 2.4751038  | -1.0081116 |
| H | 3.4808374  | 3.1321602  | -1.8316378 |
| C | 2.0125032  | -0.0510648 | 2.2051034  |
| C | 1.6700177  | -0.7592583 | 3.1427091  |
| H | 1.3889404  | -1.3933718 | 3.9602215  |
| C | 2.0721666  | -2.1379669 | -2.0468362 |
| C | 2.1231378  | -2.6346151 | -0.7326738 |
| C | 3.1459009  | -1.3847105 | -2.5523949 |
| H | 1.2841610  | -3.2079928 | -0.3319430 |
| H | 3.1069386  | -0.9885258 | -3.5721499 |
| C | 3.2360747  | -2.3760778 | 0.0766413  |
| C | 4.2644588  | -1.1206517 | -1.7504156 |
| H | 3.2658899  | -2.7321159 | 1.1089067  |
| H | 5.0942807  | -0.5204676 | -2.1329556 |
| C | 4.3203022  | -1.6111941 | -0.4223305 |

|   |            |            |            |
|---|------------|------------|------------|
| H | 1.1866191  | -2.3190344 | -2.6624642 |
| C | 5.4500520  | -1.3292502 | 0.4105918  |
| C | 6.4111079  | -1.0861754 | 1.1288690  |
| H | 7.2596370  | -0.8853573 | 1.7536587  |
| C | -1.2858442 | 0.3517776  | -2.3021353 |
| C | -1.2760009 | -0.6616871 | -1.6186247 |
| C | -1.2418641 | -1.8271112 | -0.7915797 |
| C | -1.0360403 | -1.7054323 | 0.6040570  |
| C | -1.4060415 | -3.1166697 | -1.3556173 |
| C | -0.9924566 | -2.8488929 | 1.4104025  |
| C | -1.3620941 | -4.2550802 | -0.5403204 |
| C | -1.1545686 | -4.1262570 | 0.8461927  |
| H | -1.3178172 | 1.2839614  | -2.8333819 |
| H | -0.9089673 | -0.7169848 | 1.0480256  |
| H | -1.5623916 | -3.2103736 | -2.4336484 |
| H | -0.8245714 | -2.7406080 | 2.4855701  |
| H | -1.4834082 | -5.2465526 | -0.9876479 |
| H | -1.1137001 | -5.0180650 | 1.4790042  |
| C | -4.6552583 | 2.1067499  | -2.0750726 |
| C | -4.6510106 | 1.1948917  | -1.2592444 |
| C | -4.6014383 | 0.1517569  | -0.2810350 |
| C | -4.5394740 | -1.2083714 | -0.6729767 |
| C | -4.5910430 | 0.4727390  | 1.1002017  |
| C | -4.4715402 | -2.2189107 | 0.2940854  |
| C | -4.5215838 | -0.5460772 | 2.0601775  |
| C | -4.4624302 | -1.8935482 | 1.6613019  |
| H | -4.6572647 | 2.9114499  | -2.7841831 |
| H | -4.5211004 | -1.4549795 | -1.7372804 |
| H | -4.6262719 | 1.5223190  | 1.4039089  |
| H | -4.3960479 | -3.2634958 | -0.0204284 |
| H | -4.5121299 | -0.2870346 | 3.1239463  |
| H | -4.3970312 | -2.6866696 | 2.4124203  |

\*\*\*\*\*

#### Pentamer-20

|   |            |            |            |
|---|------------|------------|------------|
| C | -2.9496435 | 1.2565522  | -2.3081696 |
| C | -2.1375283 | 0.5319240  | -1.4203453 |
| C | -3.6735446 | 2.3703131  | -1.8437759 |
| H | -1.5554776 | -0.3193436 | -1.7800626 |
| H | -4.3053753 | 2.9414077  | -2.5321101 |
| C | -2.0491017 | 0.9088119  | -0.0764759 |
| C | -3.5872111 | 2.7580878  | -0.4996842 |
| H | -1.4055413 | 0.3572716  | 0.6063580  |
| H | -4.1474837 | 3.6229831  | -0.1331984 |
| C | -2.7719782 | 2.0268743  | 0.4002282  |
| H | -3.0149389 | 0.9580124  | -3.3589196 |
| C | -2.6796905 | 2.4141585  | 1.7748406  |
| C | -2.6050865 | 2.7413988  | 2.9520669  |
| H | -2.5339465 | 3.0360544  | 3.9810277  |
| C | 1.0995419  | 1.3215874  | -1.4824941 |
| C | 1.3833402  | 0.8125501  | -0.1936937 |



|   |            |            |            |
|---|------------|------------|------------|
| C | 0.6179465  | 2.6475837  | -1.6133382 |
| H | 1.7556545  | -0.2045896 | -0.0916842 |
| H | 0.3832708  | 3.0368007  | -2.6075515 |
| C | 1.1878809  | 1.6114385  | 0.9378414  |
| C | 0.4219799  | 3.4383168  | -0.4737348 |
| H | 1.4091563  | 1.1995038  | 1.9260577  |
| H | 0.0306768  | 4.4545816  | -0.5809096 |
| C | 0.7045279  | 2.9239191  | 0.8049075  |
| H | 0.5288508  | 3.5380558  | 1.6927099  |
| C | 1.2833710  | 0.4928052  | -2.6343245 |
| C | 1.4312399  | -0.2327165 | -3.6091356 |
| H | 1.5779749  | -0.8668638 | -4.4614124 |
| C | 4.5782905  | 0.3176088  | -1.3064729 |
| C | 4.6912842  | -0.3279068 | -0.0691781 |
| C | 4.4893606  | 1.7193567  | -1.3691902 |
| H | 4.7486835  | -1.4172397 | -0.0253335 |
| H | 4.3746687  | 2.2174313  | -2.3365019 |
| C | 4.7036623  | 0.4267245  | 1.1305859  |
| C | 4.5178039  | 2.4764518  | -0.1853615 |
| H | 4.4358860  | 3.5668297  | -0.2291060 |
| C | 4.6211298  | 1.8397913  | 1.0584989  |
| H | 4.5270397  | -0.2790356 | -2.2212772 |
| H | 4.6243293  | 2.4238657  | 1.9828797  |
| C | 4.7748793  | -0.2350068 | 2.3984858  |
| C | 4.8023507  | -0.8134465 | 3.4776541  |
| H | 4.8677519  | -1.3157212 | 4.4234072  |
| C | -3.4821412 | -3.4424112 | -2.1459457 |
| C | -3.8578033 | -2.7598284 | -1.2015877 |
| C | -4.2416927 | -1.9334113 | -0.0979233 |
| C | -5.0848288 | -0.8123743 | -0.2979430 |
| C | -3.7521991 | -2.2055845 | 1.2042012  |
| C | -5.4172476 | 0.0192861  | 0.7780096  |
| C | -4.0860888 | -1.3624112 | 2.2727299  |
| C | -4.9165309 | -0.2477299 | 2.0641996  |
| H | -3.1890553 | -4.0676851 | -2.9669790 |
| H | -5.4468106 | -0.5889765 | -1.3042140 |
| H | -3.1002087 | -3.0686266 | 1.3613455  |
| H | -6.0497658 | 0.8949183  | 0.6071604  |
| H | -3.6930836 | -1.5740501 | 3.2722596  |
| H | -5.1552881 | 0.4218961  | 2.8950660  |
| C | 3.9819085  | -3.7304877 | -1.6282266 |
| C | 3.0475569  | -3.3464750 | -0.9369248 |
| C | 1.9694581  | -2.8678711 | -0.1261827 |
| C | 2.2024149  | -2.4696410 | 1.2152684  |
| C | 0.6590869  | -2.7686209 | -0.6580942 |
| C | 1.1464547  | -1.9846930 | 1.9990842  |
| C | -0.3899154 | -2.2907227 | 0.1369505  |
| C | -0.1515511 | -1.8984378 | 1.4658788  |
| H | 4.7977140  | -4.0889502 | -2.2255328 |
| H | 3.2121614  | -2.5182053 | 1.6280026  |

H 0.4787460 -3.0569432 -1.6964275  
H 1.3468219 -1.6623229 3.0253837  
H -1.3931749 -2.2173517 -0.2867245  
H -0.9747939 -1.5155712 2.0758404

\*\*\*\*\*

Pentamer-21 (P10)

C -1.2157752 2.2635007 -1.8104485  
C -1.9269570 2.6314070 -0.6561015  
C 0.1007453 2.7174666 -1.9993787  
H -2.9459268 2.2740132 -0.4915301  
H 0.6600652 2.4214202 -2.8921713  
C -1.3231923 3.4424056 0.3126172  
C 0.7126361 3.5334484 -1.0387984  
H -1.8630663 3.7089447 1.2247471  
H 1.7420193 3.8729827 -1.1736222  
C 0.0065644 3.8993091 0.1343778  
H -1.6701296 1.5952552 -2.5464381  
C 0.6376647 4.6953407 1.1434149  
C 1.1928196 5.3401083 2.0249335  
H 1.6541841 5.9520737 2.7759403  
C -0.4587976 -0.3958427 0.0605899  
C -1.6898783 -0.6995016 0.6904792  
C 0.4812589 0.4197914 0.7324118  
H -2.4036369 -1.3455861 0.1832787  
H 1.4318421 0.6594280 0.2605741  
C -1.9747491 -0.1814781 1.9587352  
C 0.1876581 0.9313159 2.0008293  
H -2.9343544 -0.4134559 2.4306135  
H 0.9201707 1.5700138 2.5015899  
C -1.0398220 0.6370483 2.6182487  
H -1.2686706 1.0435275 3.6086656  
C -0.1822299 -0.8960334 -1.2514286  
C 0.0306647 -1.3047191 -2.3852222  
H 0.2276250 -1.6916772 -3.3649885  
C 2.9905885 -1.7485817 2.0665551  
C 2.9149656 -2.3164846 0.7833878  
C 1.9283889 -1.9200676 2.9715474  
H 3.7320135 -2.1745101 0.0731162  
H 1.9763461 -1.4683007 3.9673741  
C 1.7837351 -3.0474153 0.4005323  
C 0.7919594 -2.6489316 2.5979324  
H 1.7076824 -3.4638331 -0.6065374  
H -0.0466811 -2.7641995 3.2892905  
C 0.7048262 -3.2184832 1.3033356  
H 3.8673936 -1.1587910 2.3511847  
C -0.4696185 -3.9319054 0.9027687  
C -1.4846214 -4.5183325 0.5500167  
H -2.3668688 -5.0472873 0.2489086  
C 3.4425274 2.6056935 0.8198022  
C 3.8369464 1.6942069 0.1051811

|   |            |            |            |
|---|------------|------------|------------|
| C | 4.2409197  | 0.6021827  | -0.7274855 |
| C | 3.3680411  | 0.1097747  | -1.7304179 |
| C | 5.5025832  | -0.0183229 | -0.5450408 |
| C | 3.7507893  | -0.9807886 | -2.5218972 |
| C | 5.8768709  | -1.1066675 | -1.3449437 |
| C | 5.0029684  | -1.5929925 | -2.3354731 |
| H | 3.0458904  | 3.4178518  | 1.4015860  |
| H | 2.3854651  | 0.5670438  | -1.8668188 |
| H | 6.1747783  | 0.3582772  | 0.2309831  |
| H | 3.0586787  | -1.3636342 | -3.2777982 |
| H | 6.8512939  | -1.5810081 | -1.1915421 |
| H | 5.2953043  | -2.4486224 | -2.9520604 |
| C | -5.6976766 | 2.2474274  | 0.5158211  |
| C | -5.3623551 | 1.1694741  | 0.0428928  |
| C | -4.9344976 | -0.0814436 | -0.5057648 |
| C | -5.2241216 | -1.2973638 | 0.1628122  |
| C | -4.1979700 | -0.1187568 | -1.7161459 |
| C | -4.7793725 | -2.5162818 | -0.3674999 |
| C | -3.7530837 | -1.3414160 | -2.2351504 |
| C | -4.0406613 | -2.5431670 | -1.5643630 |
| H | -6.0091925 | 3.1921036  | 0.9180609  |
| H | -5.7884219 | -1.2709518 | 1.0989443  |
| H | -3.9705278 | 0.8178380  | -2.2306430 |
| H | -5.0001584 | -3.4475291 | 0.1631334  |
| H | -3.1605292 | -1.3552890 | -3.1538213 |
| H | -3.6751536 | -3.4933870 | -1.9643094 |

\*\*\*\*\*

#### Pentamer-22 (P11)

|   |           |            |            |
|---|-----------|------------|------------|
| C | 5.4075701 | -1.4403138 | 0.0445505  |
| C | 5.7505156 | -0.6629630 | -1.0742767 |
| C | 5.1953795 | -0.8224052 | 1.2891224  |
| H | 5.8958082 | -1.1393965 | -2.0487170 |
| H | 4.8894057 | -1.4210896 | 2.1514857  |
| C | 5.8913903 | 0.7262412  | -0.9542891 |
| C | 5.3321005 | 0.5651802  | 1.4209781  |
| H | 6.1558068 | 1.3364184  | -1.8226482 |
| H | 5.1588694 | 1.0517967  | 2.3848973  |
| C | 5.6873084 | 1.3567671  | 0.2989397  |
| H | 5.2720980 | -2.5202741 | -0.0593754 |
| C | 5.8366114 | 2.7751688  | 0.4296333  |
| C | 5.9418286 | 3.9907993  | 0.5365218  |
| H | 6.0597041 | 5.0525801  | 0.6377975  |
| C | 2.3320855 | -1.3827022 | -2.2964989 |
| C | 2.2467146 | -0.2834752 | -1.4244620 |
| C | 2.2735422 | -2.6904883 | -1.7829032 |
| H | 2.2934244 | 0.7381713  | -1.8081862 |
| H | 2.3323410 | -3.5500453 | -2.4584779 |
| C | 2.1045705 | -0.4838756 | -0.0471340 |
| C | 2.1347841 | -2.9016096 | -0.4045699 |
| H | 2.0385266 | 0.3732748  | 0.6247223  |

|   |            |            |            |
|---|------------|------------|------------|
| H | 2.0808681  | -3.9153834 | 0.0005715  |
| C | 2.0511211  | -1.7982538 | 0.4790627  |
| C | 1.9302599  | -2.0101060 | 1.8883186  |
| C | 1.8474988  | -2.1896743 | 3.0956576  |
| H | 1.7335481  | -2.3400505 | 4.1514438  |
| H | 2.4453881  | -1.2225029 | -3.3734999 |
| C | -1.4317380 | -3.2602834 | -1.1690117 |
| C | -1.1298517 | -1.8995396 | -1.3467779 |
| C | -1.7226473 | -3.7499315 | 0.1182175  |
| H | -0.8888643 | -1.5122378 | -2.3397716 |
| H | -1.9568118 | -4.8091485 | 0.2633939  |
| C | -1.1170802 | -1.0293734 | -0.2512725 |
| C | -1.7148744 | -2.8849295 | 1.2215354  |
| H | -0.8768082 | 0.0225901  | -0.3882986 |
| H | -1.9403127 | -3.2598792 | 2.2232035  |
| C | -1.4144028 | -1.5114295 | 1.0460696  |
| H | -1.4336488 | -3.9409203 | -2.0262116 |
| C | -1.4280909 | -0.6170359 | 2.1629632  |
| C | -1.4846345 | 0.1548324  | 3.1104353  |
| H | -1.5059304 | 0.8297318  | 3.9436317  |
| C | -5.6373024 | 0.7639533  | 0.6444715  |
| C | -4.7350177 | -0.3277618 | 0.6981943  |
| C | -6.4257498 | 0.9546942  | -0.5189387 |
| H | -4.1096072 | -0.4624648 | 1.5834918  |
| H | -7.1186311 | 1.7995816  | -0.5629669 |
| C | -4.6217337 | -1.2034600 | -0.3897941 |
| C | -6.3066817 | 0.0716824  | -1.6015501 |
| H | -3.9084787 | -2.0294826 | -0.3439971 |
| H | -6.9161186 | 0.2298421  | -2.4972608 |
| C | -5.4053351 | -1.0076029 | -1.5404751 |
| H | -5.3085894 | -1.6897673 | -2.3912093 |
| C | -5.7298814 | 1.6798004  | 1.7415579  |
| C | -5.7825663 | 2.4783515  | 2.6678568  |
| H | -5.8518878 | 3.1660229  | 3.4885612  |
| C | 2.3641494  | 3.2110549  | -0.2748296 |
| C | 1.1912689  | 2.9510545  | -0.5102205 |
| C | -0.1705946 | 2.6027400  | -0.7798478 |
| C | -1.1444674 | 2.6566463  | 0.2496524  |
| C | -0.5622775 | 2.1769725  | -2.0753873 |
| C | -2.4713339 | 2.2901607  | -0.0113202 |
| C | -1.8924177 | 1.8114907  | -2.3250742 |
| C | -2.8497715 | 1.8636212  | -1.2960916 |
| H | 3.3942327  | 3.4404849  | -0.0650047 |
| H | -0.8419026 | 2.9685458  | 1.2523817  |
| H | 0.1862498  | 2.1324672  | -2.8711880 |
| H | -3.2094064 | 2.3166408  | 0.7938932  |
| H | -2.1817936 | 1.4736408  | -3.3252582 |
| H | -3.8798747 | 1.5533585  | -1.4860022 |

\*\*\*\*\*

Pentamer-23 (P12)

|   |            |            |            |
|---|------------|------------|------------|
| C | 0.5663573  | 2.9875978  | -2.4085984 |
| C | 1.1926988  | 1.8476749  | -1.8460072 |
| C | 0.2479414  | 4.0834637  | -1.5687483 |
| C | 1.4904859  | 1.8038549  | -0.4782108 |
| C | 0.5470992  | 4.0296861  | -0.2007183 |
| C | 1.1670886  | 2.8942207  | 0.3484828  |
| C | -1.6303203 | 0.7130833  | 0.1757017  |
| C | -1.1880173 | -0.5755917 | -0.2106077 |
| C | -2.1844087 | 1.5752203  | -0.8005639 |
| C | -1.3080735 | -0.9895394 | -1.5425491 |
| C | -2.2895618 | 1.1568380  | -2.1322043 |
| C | -1.8538867 | -0.1253148 | -2.5077638 |
| C | -1.5215864 | 1.1411568  | 1.5353187  |
| C | -1.4453452 | 1.5065833  | 2.7004941  |
| C | 0.2396331  | 3.0216569  | -3.8019566 |
| C | -0.0562582 | 3.0436138  | -4.9899125 |
| H | 1.4144196  | 1.0000536  | -2.4976156 |
| H | -0.2388172 | 4.9629174  | -1.9999903 |
| H | 1.9587297  | 0.9160665  | -0.0451837 |
| H | 0.2877452  | 4.8758991  | 0.4435089  |
| H | -0.7602565 | -1.2473680 | 0.5353752  |
| H | -2.5228147 | 2.5688822  | -0.5019215 |
| H | -0.9732638 | -1.9915881 | -1.8211342 |
| H | -2.6968172 | 1.8389000  | -2.8836135 |
| H | -1.9347188 | -0.4466776 | -3.5506284 |
| H | -1.2733656 | 1.8502602  | 3.7015497  |
| H | -0.2942557 | 3.0747325  | -6.0355552 |
| H | 1.3773846  | 2.8518603  | 1.4185247  |
| C | 2.3895873  | 1.0001190  | 3.1617288  |
| C | 1.6546621  | -0.1597861 | 2.8091665  |
| C | 3.7049341  | 1.1643872  | 2.6584114  |
| C | 2.2320249  | -1.1351717 | 1.9855589  |
| C | 4.2712656  | 0.1828166  | 1.8336415  |
| C | 3.5413850  | -0.9711733 | 1.4991059  |
| C | 1.8149415  | 2.0041302  | 4.0063181  |
| C | 1.3370206  | 2.8769257  | 4.7195436  |
| H | 0.6295279  | -0.2725142 | 3.1671509  |
| H | 4.2679748  | 2.0650238  | 2.9186780  |
| H | 1.6553733  | -2.0223895 | 1.7104492  |
| H | 5.2857801  | 0.3213486  | 1.4466516  |
| H | 0.9291829  | 3.6364263  | 5.3583095  |
| H | 3.9830363  | -1.7290011 | 0.8476454  |
| C | -0.0077271 | -3.9609756 | -0.0123220 |
| C | 1.0372701  | -3.5449797 | -0.4937194 |
| C | 2.2487232  | -3.0069259 | -1.0346681 |
| C | 3.4425085  | -3.7711051 | -1.0453389 |
| C | 2.2702567  | -1.6813535 | -1.5369115 |
| C | 4.6286974  | -3.2158009 | -1.5463492 |
| C | 3.4605591  | -1.1364729 | -2.0346798 |
| C | 4.6420244  | -1.8988358 | -2.0420529 |

|   |            |            |            |
|---|------------|------------|------------|
| H | -0.9514349 | -4.2815746 | 0.3837451  |
| H | 3.4280853  | -4.7919423 | -0.6534242 |
| H | 1.3537583  | -1.0893749 | -1.5090048 |
| H | 5.5470174  | -3.8116241 | -1.5466022 |
| H | 3.4732133  | -0.1063733 | -2.4015978 |
| H | 5.5712225  | -1.4679223 | -2.4280050 |
| C | -5.5570620 | 1.7072097  | 0.5960400  |
| C | -5.1087247 | 0.5690245  | 0.6071272  |
| C | -4.5952427 | -0.7666106 | 0.6274262  |
| C | -3.9865448 | -1.2823113 | 1.7993446  |
| C | -4.6901086 | -1.5905699 | -0.5210527 |
| C | -3.5102086 | -2.5994921 | 1.8242193  |
| C | -4.2110505 | -2.9067547 | -0.4867778 |
| C | -3.6318334 | -3.4192039 | 0.6874935  |
| H | -5.9405576 | 2.7088918  | 0.5848253  |
| H | -3.8793814 | -0.6340843 | 2.6719437  |
| H | -5.1362248 | -1.1850023 | -1.4326304 |
| H | -3.0474036 | -2.9890711 | 2.7367086  |
| H | -4.2936106 | -3.5359826 | -1.3785132 |
| H | -3.2872951 | -4.4584325 | 0.7191908  |

\*\*\*\*\*

#### Pentamer-24

|   |            |            |            |
|---|------------|------------|------------|
| C | 1.3087511  | 2.7803529  | -2.3807087 |
| C | 0.8070232  | 3.5547829  | -1.3198581 |
| C | 2.6164706  | 2.2691877  | -2.3153748 |
| H | -0.2186258 | 3.9320931  | -1.3539310 |
| H | 3.0108357  | 1.6617042  | -3.1359235 |
| C | 1.6029527  | 3.8174855  | -0.1985257 |
| C | 3.4223967  | 2.5259063  | -1.1977229 |
| H | 1.2055976  | 4.3925452  | 0.6409612  |
| H | 4.4320207  | 2.1141414  | -1.1358975 |
| C | 2.9209996  | 3.3021081  | -0.1240307 |
| H | 0.6749479  | 2.5585679  | -3.2438140 |
| C | 3.7259499  | 3.5408132  | 1.0356270  |
| C | 4.4044862  | 3.7150338  | 2.0405769  |
| H | 5.0127710  | 3.9199906  | 2.9003685  |
| C | -0.3644279 | 0.6895940  | -0.0740123 |
| C | -1.3813001 | 1.5085647  | 0.4741242  |
| C | 0.8496029  | 0.5276912  | 0.6329827  |
| H | -2.3255453 | 1.6360528  | -0.0564506 |
| H | 1.6309500  | -0.1151261 | 0.2347678  |
| C | -1.1782972 | 2.1522843  | 1.7009231  |
| C | 1.0460098  | 1.1801773  | 1.8537556  |
| H | -1.9756674 | 2.7747687  | 2.1186734  |
| H | 1.9954429  | 1.0500792  | 2.3783397  |
| C | 0.0361295  | 1.9947638  | 2.3931228  |
| H | 0.1929027  | 2.5042371  | 3.3490177  |
| C | -0.5627682 | 0.0372249  | -1.3324042 |
| C | -0.7327616 | -0.5064892 | -2.4160664 |
| H | -0.8911837 | -0.9879767 | -3.3606069 |

|   |            |            |            |
|---|------------|------------|------------|
| C | 1.6391493  | -2.6874600 | 2.0710888  |
| C | 0.8997058  | -2.9604652 | 0.9070243  |
| C | 1.0081454  | -2.0905794 | 3.1765259  |
| H | 1.3893367  | -3.4132452 | 0.0416368  |
| H | 1.5817984  | -1.8700712 | 4.0825357  |
| C | -0.4594946 | -2.6303495 | 0.8416159  |
| C | -0.3518811 | -1.7558080 | 3.1197603  |
| H | -1.0296309 | -2.8092148 | -0.0731094 |
| H | -0.8424768 | -1.2709191 | 3.9680467  |
| C | -1.1012946 | -2.0144878 | 1.9458998  |
| H | 2.7071869  | -2.9208069 | 2.1034974  |
| C | -2.4762704 | -1.6295140 | 1.8517485  |
| C | -3.6413203 | -1.2770398 | 1.7294113  |
| H | -4.6532664 | -0.9593168 | 1.5669522  |
| C | 4.5225520  | 0.1202981  | 0.9628575  |
| C | 4.2142451  | -0.7933735 | 0.2100794  |
| C | 3.7811324  | -1.8368001 | -0.6682382 |
| C | 2.8707603  | -1.5485742 | -1.7164742 |
| C | 4.2231271  | -3.1711362 | -0.4845350 |
| C | 2.4111769  | -2.5754903 | -2.5506986 |
| C | 3.7595957  | -4.1905078 | -1.3272433 |
| C | 2.8523995  | -3.8973218 | -2.3627352 |
| H | 4.7676120  | 0.9723955  | 1.5694342  |
| H | 2.5121569  | -0.5260809 | -1.8542903 |
| H | 4.9195062  | -3.3962448 | 0.3280795  |
| H | 1.6942508  | -2.3417881 | -3.3434494 |
| H | 4.1023972  | -5.2185266 | -1.1734861 |
| H | 2.4887777  | -4.6970603 | -3.0155913 |
| C | -4.6214940 | 3.4091112  | -0.3878443 |
| C | -4.9047948 | 2.2293185  | -0.5495987 |
| C | -5.2151457 | 0.8421431  | -0.7229787 |
| C | -6.4178759 | 0.3036377  | -0.1973740 |
| C | -4.3178470 | -0.0130773 | -1.4098968 |
| C | -6.7119719 | -1.0574985 | -0.3628429 |
| C | -4.6198271 | -1.3723033 | -1.5641422 |
| C | -5.8154590 | -1.8995458 | -1.0465965 |
| H | -4.3839220 | 4.4477292  | -0.2611265 |
| H | -7.1101601 | 0.9611423  | 0.3359811  |
| H | -3.3788943 | 0.3850946  | -1.8009963 |
| H | -7.6421041 | -1.4636718 | 0.0473991  |
| H | -3.9062422 | -2.0252748 | -2.0758817 |
| H | -6.0440385 | -2.9635742 | -1.1633131 |

\*\*\*\*\*

#### Pentamer-25

|   |           |            |            |
|---|-----------|------------|------------|
| C | 4.6976901 | 1.3705831  | -1.5419497 |
| C | 5.1525628 | 1.6929208  | -0.2502369 |
| C | 4.2603175 | 0.0646585  | -1.8238917 |
| H | 5.4727283 | 2.7138450  | -0.0204154 |
| H | 3.8723201 | -0.1858674 | -2.8154148 |
| C | 5.1802049 | 0.7168339  | 0.7544302  |

|   |            |            |            |
|---|------------|------------|------------|
| C | 4.2901003  | -0.9208558 | -0.8274708 |
| H | 5.5173311  | 0.9664925  | 1.7636496  |
| H | 3.9400643  | -1.9318679 | -1.0403278 |
| C | 4.7570052  | -0.6067399 | 0.4727452  |
| H | 4.6648484  | 2.1407327  | -2.3188941 |
| C | 4.8062017  | -1.6168832 | 1.4860735  |
| C | 4.8654952  | -2.4863742 | 2.3456311  |
| H | 4.9334339  | -3.2540111 | 3.0918599  |
| C | 1.1251275  | -1.7509330 | -1.8686910 |
| C | 0.9663781  | -1.5721316 | -0.4725913 |
| C | 1.7111277  | -2.9482786 | -2.3508143 |
| H | 0.4986630  | -0.6616351 | -0.0997731 |
| H | 1.8309290  | -3.0903039 | -3.4286223 |
| C | 1.4115931  | -2.5543118 | 0.4196109  |
| C | 2.1419880  | -3.9326990 | -1.4493516 |
| H | 1.3096816  | -2.3841271 | 1.4945298  |
| H | 2.5983592  | -4.8522979 | -1.8293634 |
| C | 2.0016492  | -3.7353093 | -0.0627392 |
| H | 2.3622145  | -4.4945595 | 0.6375845  |
| C | 0.7118951  | -0.7199568 | -2.7705478 |
| C | 0.3787189  | 0.1890258  | -3.5186824 |
| H | 0.0188140  | 0.9808975  | -4.1449548 |
| C | -2.3890402 | -0.5207415 | -0.9731980 |
| C | -1.9653346 | 0.8013423  | -0.6915736 |
| C | -2.3821699 | -1.4894417 | 0.0365067  |
| H | -2.7256050 | -2.5032324 | -0.1843710 |
| C | -1.5092596 | 1.1197503  | 0.6103661  |
| C | -1.9428529 | -1.1637380 | 1.3317839  |
| H | -1.1613734 | 2.1311103  | 0.8232907  |
| H | -1.9464905 | -1.9253174 | 2.1161841  |
| C | -1.4974578 | 0.1392120  | 1.6117617  |
| H | -2.7313707 | -0.7687917 | -1.9797049 |
| H | -1.1254505 | 0.3933276  | 2.6081913  |
| C | -2.0263812 | 1.8136511  | -1.7006839 |
| C | -2.1219600 | 2.6912891  | -2.5487323 |
| H | -2.1912893 | 3.4595302  | -3.2938510 |
| C | 2.4102376  | 0.0517191  | 3.2968094  |
| C | 2.0688465  | 0.9557463  | 2.5464463  |
| C | 1.6465128  | 1.9787062  | 1.6399028  |
| C | 1.0594261  | 3.1778122  | 2.1161405  |
| C | 1.7954842  | 1.7888772  | 0.2441714  |
| C | 0.6180831  | 4.1528662  | 1.2095445  |
| C | 1.3403383  | 2.7618308  | -0.6531275 |
| C | 0.7489396  | 3.9444917  | -0.1764149 |
| H | 2.7733099  | -0.7375859 | 3.9245461  |
| H | 0.9471555  | 3.3284600  | 3.1935323  |
| H | 2.2619398  | 0.8757007  | -0.1240160 |
| H | 0.1614480  | 5.0739156  | 1.5855849  |
| H | 1.4333726  | 2.5817500  | -1.7271653 |
| H | 0.3795649  | 4.6959839  | -0.8805360 |



|   |            |            |            |
|---|------------|------------|------------|
| C | -5.4425865 | -2.7217097 | 2.7470177  |
| C | -5.5073994 | -1.8503948 | 1.8893914  |
| C | -5.5504436 | -0.8391939 | 0.8770581  |
| C | -5.0784198 | 0.4687683  | 1.1497251  |
| C | -6.0399353 | -1.1396077 | -0.4185698 |
| C | -5.0848368 | 1.4438143  | 0.1453091  |
| C | -6.0450702 | -0.1547012 | -1.4159651 |
| C | -5.5656496 | 1.1376897  | -1.1396150 |
| H | -5.4150722 | -3.4785110 | 3.5069928  |
| H | -4.6818320 | 0.6966061  | 2.1419778  |
| H | -6.4030730 | -2.1491069 | -0.6318171 |
| H | -4.6873149 | 2.4407046  | 0.3562819  |
| H | -6.4183953 | -0.3995546 | -2.4157938 |
| H | -5.5460869 | 1.8979426  | -1.9261208 |

\*\*\*\*\*

Pentamer-26

|   |            |            |            |
|---|------------|------------|------------|
| C | 0.3917098  | 2.8905035  | -0.6388685 |
| C | 0.9035237  | 3.7243498  | -1.6657109 |
| C | 0.4815450  | 3.3254501  | 0.7088978  |
| C | 1.4934048  | 4.9565927  | -1.3496172 |
| C | 1.0708826  | 4.5604026  | 1.0145881  |
| C | 1.5802616  | 5.3798059  | -0.0101057 |
| C | -0.1860378 | 1.6201364  | -0.9497466 |
| C | -0.6676000 | 0.5226890  | -1.1887000 |
| H | 0.8440186  | 3.3876457  | -2.7043021 |
| H | 0.1190911  | 2.6715243  | 1.5044014  |
| H | 1.8929640  | 5.5885062  | -2.1492793 |
| H | 1.1433470  | 4.8816579  | 2.0585341  |
| H | 2.0431720  | 6.3412197  | 0.2331274  |
| H | -1.0933304 | -0.4451179 | -1.3685776 |
| C | 0.3703331  | -2.8446182 | -0.8805350 |
| C | -0.2961889 | -2.6754052 | 0.3591355  |
| C | -0.4006169 | -2.9603469 | -2.0660428 |
| C | -1.6945551 | -2.5983563 | 0.4085243  |
| C | -1.7996712 | -2.8761193 | -2.0067963 |
| C | -2.4508394 | -2.6869691 | -0.7734147 |
| C | 1.8013836  | -2.8533846 | -0.9280828 |
| C | 3.0242215  | -2.8151006 | -0.9459341 |
| H | 0.2972480  | -2.5685324 | 1.2689332  |
| H | 0.1099612  | -3.0919415 | -3.0240983 |
| H | -2.1920136 | -2.4420773 | 1.3688845  |
| H | -2.3884583 | -2.9385715 | -2.9269165 |
| H | -3.5385506 | -2.5839239 | -0.7411979 |
| H | 4.0964098  | -2.7555744 | -0.9495930 |
| C | 5.2446646  | -0.0039648 | -0.2181087 |
| C | 5.8018757  | -0.4348692 | -1.4488820 |
| C | 5.4357809  | -0.8002963 | 0.9397020  |
| C | 6.5286716  | -1.6317850 | -1.5156892 |
| C | 6.1627846  | -1.9965297 | 0.8631526  |
| C | 6.7117772  | -2.4169534 | -0.3620584 |

|   |            |            |            |
|---|------------|------------|------------|
| C | 4.4859475  | 1.2089526  | -0.1530562 |
| C | 3.8220613  | 2.2357285  | -0.1064094 |
| H | 5.6498969  | 0.1740717  | -2.3442408 |
| H | 5.0031416  | -0.4772565 | 1.8906936  |
| H | 6.9479289  | -1.9587708 | -2.4724959 |
| H | 6.2959271  | -2.6083582 | 1.7609222  |
| H | 7.2746363  | -3.3537037 | -0.4191848 |
| H | 3.2112308  | 3.1189225  | -0.0700797 |
| C | -3.6002250 | 2.9052232  | 0.4185351  |
| C | -3.9743917 | 1.9473798  | -0.2443105 |
| C | -4.4133317 | 0.8372463  | -1.0336859 |
| C | -3.8288680 | 0.5880403  | -2.3013167 |
| C | -5.4452326 | -0.0181107 | -0.5708335 |
| C | -4.2759998 | -0.4840415 | -3.0849518 |
| C | -5.8853941 | -1.0878861 | -1.3628076 |
| C | -5.3055423 | -1.3228295 | -2.6227513 |
| H | -3.2446016 | 3.7359345  | 0.9964268  |
| H | -3.0219195 | 1.2369056  | -2.6492361 |
| H | -5.8987385 | 0.1704661  | 0.4062315  |
| H | -3.8183610 | -0.6668740 | -4.0623534 |
| H | -6.6869632 | -1.7386410 | -0.9987842 |
| H | -5.6531392 | -2.1579105 | -3.2392551 |
| C | 1.6276485  | 0.2535796  | 1.9611245  |
| C | 0.5189481  | -0.0126975 | 2.4036713  |
| C | -0.8030666 | -0.3392016 | 2.8416252  |
| C | -1.9227587 | 0.2866634  | 2.2372434  |
| C | -1.0169569 | -1.3169708 | 3.8456883  |
| C | -3.2212239 | -0.0546427 | 2.6369086  |
| C | -2.3211908 | -1.6597613 | 4.2303448  |
| C | -3.4270750 | -1.0292287 | 3.6299172  |
| H | 2.5686934  | 0.5275642  | 1.5205858  |
| H | -1.7703268 | 1.0079966  | 1.4322299  |
| H | -0.1546257 | -1.8059246 | 4.3078951  |
| H | -4.0709030 | 0.4404846  | 2.1594673  |
| H | -2.4765525 | -2.4196824 | 5.0030914  |
| H | -4.4431163 | -1.2994695 | 3.9352077  |

\*\*\*\*\*

#### Pentamer-27

|   |           |            |            |
|---|-----------|------------|------------|
| C | 2.7614975 | 1.1069793  | -1.7481838 |
| C | 2.5637841 | 1.2345759  | -0.3627723 |
| C | 2.5800227 | -0.1416861 | -2.3677345 |
| H | 2.7040511 | 2.2043469  | 0.1205891  |
| H | 2.7327977 | -0.2460052 | -3.4468260 |
| C | 2.1891706 | 0.1266556  | 0.4027076  |
| C | 2.2034401 | -1.2588382 | -1.6091997 |
| H | 2.0276007 | 0.2241286  | 1.4770132  |
| H | 2.0570495 | -2.2321479 | -2.0855973 |
| C | 2.0022875 | -1.1343420 | -0.2130938 |
| H | 3.0584218 | 1.9776958  | -2.3394708 |
| C | 1.5910501 | -2.2613675 | 0.5648892  |

|   |            |            |            |
|---|------------|------------|------------|
| C | 1.2189826  | -3.2163752 | 1.2337545  |
| H | 0.8314466  | -4.0367902 | 1.8048397  |
| C | -0.7084663 | 2.3715778  | -0.4782026 |
| C | -0.9179780 | 2.3261611  | 0.9221820  |
| C | -0.7590668 | 1.1672996  | -1.2224395 |
| H | -0.8927471 | 3.2559285  | 1.4962064  |
| H | -0.5848700 | 1.1967859  | -2.3004497 |
| C | -1.1736042 | 1.1026242  | 1.5555970  |
| C | -1.0110154 | -0.0474944 | -0.5779026 |
| H | -1.3519185 | 1.0789008  | 2.6346672  |
| H | -1.0275028 | -0.9689897 | -1.1577658 |
| C | -1.2210089 | -0.0872882 | 0.8102715  |
| H | -1.4197017 | -1.0402446 | 1.3048301  |
| C | -0.4507440 | 3.6160710  | -1.1357270 |
| C | -0.2331121 | 4.6771670  | -1.7070302 |
| H | -0.0350496 | 5.6074998  | -2.2027498 |
| C | -4.7005467 | 3.6391984  | 1.2110524  |
| C | -4.8327312 | 2.4003920  | 1.8544462  |
| C | -4.2985301 | 3.7004373  | -0.1352871 |
| H | -5.1349641 | 2.3485556  | 2.9044127  |
| H | -4.1765097 | 4.6694382  | -0.6292677 |
| C | -4.5594869 | 1.2005846  | 1.1517140  |
| C | -4.0329019 | 2.5129511  | -0.8394072 |
| H | -3.6927252 | 2.5571226  | -1.8779881 |
| C | -4.1645619 | 1.2711629  | -0.2072526 |
| H | -4.9066663 | 4.5615182  | 1.7644181  |
| H | -3.9185902 | 0.3511139  | -0.7408204 |
| C | -4.6403656 | -0.0675914 | 1.8109418  |
| C | -4.6691363 | -1.1560893 | 2.3700854  |
| H | -4.6743233 | -2.1231559 | 2.8335927  |
| C | 6.4019349  | 2.9142709  | -0.7981633 |
| C | 6.1006748  | 1.8916769  | -0.1961888 |
| C | 5.7190401  | 0.7019454  | 0.5024086  |
| C | 5.6222745  | -0.5339685 | -0.1840189 |
| C | 5.4083219  | 0.7489274  | 1.8843331  |
| C | 5.2139351  | -1.6877146 | 0.4961086  |
| C | 5.0026091  | -0.4124559 | 2.5561047  |
| C | 4.9017151  | -1.6330779 | 1.8657144  |
| H | 6.6924792  | 3.8060451  | -1.3191663 |
| H | 5.8456590  | -0.5688130 | -1.2532754 |
| H | 5.4794249  | 1.7027581  | 2.4147304  |
| H | 5.1153906  | -2.6313859 | -0.0486392 |
| H | 4.7564394  | -0.3633693 | 3.6218646  |
| H | 4.5614599  | -2.5333265 | 2.3857488  |
| C | -2.2951690 | -4.0811002 | 2.1933424  |
| C | -2.3345695 | -3.7322274 | 1.0208481  |
| C | -2.3773954 | -3.3163483 | -0.3486060 |
| C | -1.3309497 | -3.6690632 | -1.2377828 |
| C | -3.4603826 | -2.5366868 | -0.8265161 |
| C | -1.3744063 | -3.2518162 | -2.5752225 |

C -3.4931391 -2.1265306 -2.1661862  
C -2.4541034 -2.4819738 -3.0449907  
H -2.2646506 -4.3938689 3.2190577  
H -0.4823199 -4.2452442 -0.8632624  
H -4.2506661 -2.2377457 -0.1341710  
H -0.5580313 -3.5221414 -3.2521295  
H -4.3295132 -1.5182563 -2.5244955  
H -2.4818792 -2.1551439 -4.0890710

\*\*\*\*\*

Pentamer-28 (P13)

C -0.1103030 -3.8418663 -0.4110093  
C 0.4094398 -3.2032375 0.7433523  
C 0.5708139 -4.9672381 -0.9412249  
C 1.5774803 -3.6803903 1.3533425  
C 1.7386851 -5.4395499 -0.3229395  
C 2.2447892 -4.8007778 0.8257677  
C -1.3078717 -3.3448263 -1.0186708  
C -2.3431495 -2.8987066 -1.4938133  
C 3.5026476 0.3799658 -2.3396927  
C 2.6842793 1.1230327 -3.2285490  
C 4.6766838 0.9851686 -1.8214416  
C 3.0352136 2.4317339 -3.5866895  
C 5.0192728 2.2955895 -2.1856886  
C 4.2016182 3.0235622 -3.0693261  
C 3.1385951 -0.9502838 -1.9582885  
C 2.8086044 -2.0760460 -1.6117705  
H -0.1052566 -2.3258876 1.1401402  
H 0.1772312 -5.4593958 -1.8350850  
H 1.9748771 -3.1611328 2.2298890  
H 2.2573810 -6.3083030 -0.7412139  
H 3.1590760 -5.1707038 1.3009182  
H -3.2649453 -2.5054958 -1.8783060  
H 1.7727015 0.6644490 -3.6206886  
H 5.3114730 0.4172640 -1.1358467  
H 2.3875704 2.9977468 -4.2635408  
H 5.9264537 2.7507857 -1.7759662  
H 4.4679977 4.0483669 -3.3465939  
H 2.4950306 -3.0493141 -1.2830321  
C -4.7225290 -0.2795997 -0.6105130  
C -5.2916021 -0.5832046 -1.8738791  
C -4.7764434 -1.2532688 0.4184465  
C -5.9023487 -1.8265878 -2.0940802  
C -5.3906426 -2.4921000 0.1894802  
C -5.9571291 -2.7841362 -1.0640622  
C -4.0999445 0.9895816 -0.3811567  
C -3.5756060 2.0795085 -0.1910443  
H -5.2470345 0.1631175 -2.6718521  
H -4.3238829 -1.0323404 1.3889230  
H -6.3362873 -2.0493682 -3.0741661  
H -5.4163394 -3.2379708 0.9898828

|   |            |            |            |
|---|------------|------------|------------|
| H | -6.4307472 | -3.7550348 | -1.2409372 |
| H | -3.0854628 | 3.0191912  | -0.0128946 |
| H | 2.7104550  | 2.4920516  | -0.6778722 |
| C | 1.8142126  | 2.9493315  | -0.3043247 |
| C | 0.7791491  | 3.4590819  | 0.1006172  |
| C | -0.4256532 | 4.0772229  | 0.5657073  |
| C | -1.1335318 | 4.9816053  | -0.2675426 |
| H | -0.7490789 | 5.1939851  | -1.2691024 |
| C | -2.3113567 | 5.5924164  | 0.1874069  |
| H | -2.8484499 | 6.2860664  | -0.4673653 |
| H | -3.7246343 | 5.7894125  | 1.8275220  |
| C | -2.8031470 | 5.3141499  | 1.4765680  |
| C | -2.1081525 | 4.4162630  | 2.3078176  |
| H | -2.4896531 | 4.1900009  | 3.3086009  |
| C | -0.9302337 | 3.7998896  | 1.8618051  |
| H | -0.3990358 | 3.0882886  | 2.4976482  |
| C | -1.1696152 | 0.3826458  | 1.8308426  |
| C | -0.0234040 | 0.1156908  | 2.1661474  |
| C | 1.3234671  | -0.2534264 | 2.4784723  |
| C | 2.3020508  | -0.2573100 | 1.4532276  |
| C | 1.6917531  | -0.6549868 | 3.7872666  |
| C | 3.6141757  | -0.6581693 | 1.7336284  |
| C | 3.0098540  | -1.0500253 | 4.0584426  |
| C | 3.9755112  | -1.0523996 | 3.0342970  |
| H | -2.1467585 | 0.6753546  | 1.4920857  |
| H | 2.0153751  | 0.0300089  | 0.4405147  |
| H | 0.9365583  | -0.6587566 | 4.5783756  |
| H | 4.3486906  | -0.6803354 | 0.9239796  |
| H | 3.2836388  | -1.3607276 | 5.0720427  |
| H | 5.0024586  | -1.3649927 | 3.2507919  |

\*\*\*\*\*

#### Pentamer-29

|   |            |            |            |
|---|------------|------------|------------|
| C | -1.1278096 | -2.5461344 | 1.7914595  |
| C | -1.4327360 | -3.2390263 | 0.5920556  |
| C | -1.8027525 | -2.9080789 | 2.9855403  |
| C | -2.3894538 | -4.2634315 | 0.5914572  |
| C | -2.7566276 | -3.9354481 | 2.9753452  |
| C | -3.0548556 | -4.6168439 | 1.7796318  |
| C | -0.1591350 | -1.4918998 | 1.7952769  |
| C | 0.6804805  | -0.6025488 | 1.7877172  |
| H | -0.9306058 | -2.9566917 | -0.3354001 |
| H | -1.5763821 | -2.3696753 | 3.9098592  |
| H | -2.6234350 | -4.7792337 | -0.3449322 |
| H | -3.2744590 | -4.2019885 | 3.9022502  |
| H | -3.8039043 | -5.4149187 | 1.7748692  |
| H | 1.4090286  | 0.1851355  | 1.7582039  |
| C | 0.4921920  | 2.7949645  | 1.0122214  |
| C | 1.2576794  | 2.9226423  | 2.1996897  |
| C | 1.1378800  | 2.3694405  | -0.1767811 |
| C | 2.6298015  | 2.6309433  | 2.1933808  |

|   |            |            |            |
|---|------------|------------|------------|
| C | 2.5110078  | 2.0895947  | -0.1729888 |
| C | 3.2641495  | 2.2169163  | 1.0075346  |
| C | -0.9110446 | 3.0759579  | 1.0149928  |
| C | -2.1110348 | 3.3130349  | 1.0068799  |
| H | 0.7607930  | 3.2401815  | 3.1203756  |
| H | 0.5508732  | 2.2470284  | -1.0905835 |
| H | 3.2065364  | 2.7255191  | 3.1191054  |
| H | 2.9991422  | 1.7606684  | -1.0940027 |
| H | 4.3320110  | 1.9855798  | 1.0018337  |
| H | -3.1688278 | 3.4940778  | 0.9817833  |
| C | -4.7807385 | 1.2736043  | 0.0659874  |
| C | -4.1957848 | 1.6919698  | -1.1565288 |
| C | -5.6030980 | 2.1811302  | 0.7815953  |
| C | -4.4327955 | 2.9835747  | -1.6462041 |
| C | -5.8284963 | 3.4736574  | 0.2857476  |
| C | -5.2465450 | 3.8796329  | -0.9299700 |
| C | -4.5263684 | -0.0373503 | 0.5819016  |
| C | -4.2954139 | -1.1554410 | 1.0209681  |
| H | -3.5502650 | 0.9991908  | -1.7019677 |
| H | -6.0501065 | 1.8632650  | 1.7277305  |
| H | -3.9681382 | 3.2974252  | -2.5864386 |
| H | -6.4603418 | 4.1672489  | 0.8499891  |
| H | -5.4228575 | 4.8898599  | -1.3128529 |
| H | -4.0476541 | -2.1295244 | 1.3986164  |
| C | 3.2508954  | -2.4048981 | 0.8658279  |
| C | 4.1536346  | -1.6171368 | 0.6201452  |
| C | 5.1551462  | -0.6373133 | 0.3348901  |
| C | 5.2291592  | -0.0435453 | -0.9501944 |
| C | 6.0581001  | -0.2094922 | 1.3409625  |
| C | 6.1649832  | 0.9655141  | -1.2126283 |
| C | 6.9939833  | 0.7983243  | 1.0689007  |
| C | 7.0478823  | 1.3940027  | -0.2047479 |
| H | 2.4335731  | -3.0640436 | 1.0852936  |
| H | 4.5351300  | -0.3708555 | -1.7275812 |
| H | 6.0045799  | -0.6643695 | 2.3338491  |
| H | 6.2036040  | 1.4238528  | -2.2060056 |
| H | 7.6814494  | 1.1250368  | 1.8558097  |
| H | 7.7754418  | 2.1851384  | -0.4113071 |
| C | -3.4106661 | -1.5944978 | -2.3822418 |
| C | -2.2170476 | -1.4545901 | -2.6120553 |
| C | -0.8062626 | -1.3376225 | -2.8250831 |
| C | 0.0321484  | -0.8741305 | -1.7786285 |
| C | -0.2243005 | -1.7121081 | -4.0630769 |
| C | 1.4212202  | -0.8248461 | -1.9573591 |
| C | 1.1643542  | -1.6400060 | -4.2385377 |
| C | 1.9903604  | -1.2068944 | -3.1846190 |
| H | -4.4524629 | -1.6691049 | -2.1389008 |
| H | -0.4072227 | -0.5754734 | -0.8244387 |
| H | -0.8699398 | -2.0625352 | -4.8733618 |
| H | 2.0536067  | -0.5046394 | -1.1262796 |

H 1.6045517 -1.9325408 -5.1974471  
H 3.0752009 -1.1761034 -3.3259257

\*\*\*\*\*

Pentamer-30 (P14)

C 3.3895304 1.3284040 1.3404378  
C 3.3942529 0.3472408 2.3469745  
C 3.3718172 0.9428072 -0.0107350  
H 3.4073421 0.6416485 3.4014495  
H 3.3667856 1.7043423 -0.7942198  
C 3.3817855 -1.0131170 2.0078149  
C 3.3589562 -0.4113958 -0.3595996  
H 3.3841897 -1.7812693 2.7861716  
H 3.3437898 -0.7147872 -1.4079314  
C 3.3637751 -1.4067019 0.6471634  
H 3.3979148 2.3891473 1.6047923  
C 3.3505617 -2.7937212 0.2946061  
C 3.3387426 -3.9808279 -0.0042411  
H 3.3255296 -5.0217108 -0.2639246  
C -0.0019214 1.1785355 -0.3098406  
C 0.0002136 0.1854316 0.6990374  
C -0.0162742 0.7821368 -1.6696410  
H 0.0109209 0.4912458 1.7466550  
H -0.0179486 1.5488375 -2.4493243  
C -0.0113650 -1.1694684 0.3529490  
C -0.0277180 -0.5788718 -2.0060535  
H -0.0096953 -1.9292653 1.1381123  
H -0.0382732 -0.8753476 -3.0598738  
C -0.0252463 -1.5579272 -0.9974668  
H -0.0332688 -2.6191573 -1.2596515  
C 0.0111611 2.5661300 0.0396500  
C 0.0233960 3.7540276 0.3362242  
H 0.0340850 4.7951324 0.5941663  
C -3.3728280 1.4446562 1.3690217  
C -3.3752086 0.4944358 2.4052046  
C -3.3759125 1.0185545 0.0300478  
H -3.3720889 0.8208220 3.4503606  
H -3.3748992 1.7562882 -0.7759142  
C -3.3809070 -0.8753887 2.1073106  
C -3.3810655 -0.3459164 -0.2775232  
H -3.3814765 -1.6198137 2.9083791  
H -3.3809692 -0.6814689 -1.3161085  
C -3.3831909 -1.3100514 0.7589694  
H -3.3641318 2.5129366 1.6019125  
C -3.3835121 -2.7072832 0.4494355  
C -3.3784717 -3.9035130 0.1886613  
H -3.3736603 -4.9519785 -0.0382533  
C 6.7434962 1.0748460 -0.4606959  
C 6.7601332 0.1094512 0.5763085  
C 6.7115427 0.6380800 -1.8086257  
H 6.7687448 0.4450432 1.6162743

|   |            |            |            |
|---|------------|------------|------------|
| H | 6.6991122  | 1.3821376  | -2.6101914 |
| C | 6.7363379  | -1.2564344 | 0.2689724  |
| C | 6.6896313  | -0.7317160 | -2.1060246 |
| H | 6.7270065  | -1.9934230 | 1.0774340  |
| H | 6.6614113  | -1.0581816 | -3.1509481 |
| C | 6.7000072  | -1.6826636 | -1.0703044 |
| H | 6.6656661  | -2.7509721 | -1.3039567 |
| C | 6.7398426  | 2.4727771  | -0.1513745 |
| C | 6.7162964  | 3.6682988  | 0.1115542  |
| H | 6.7174164  | 4.7164568  | 0.3407487  |
| C | -6.7121094 | 1.0644502  | -0.6389941 |
| C | -6.7694973 | 0.3489707  | 0.5827153  |
| C | -6.6810828 | 0.3439627  | -1.8589470 |
| H | -6.7773668 | 0.9029494  | 1.5246437  |
| H | -6.6362145 | 0.8948510  | -2.8027918 |
| C | -6.7870764 | -1.0511705 | 0.5798930  |
| C | -6.6995267 | -1.0578159 | -1.8510720 |
| H | -6.8118068 | -1.5938460 | 1.5295571  |
| H | -6.6693969 | -1.6048371 | -2.7991826 |
| C | -6.7510504 | -1.7597816 | -0.6339575 |
| H | -6.7458639 | -2.8536333 | -0.6296797 |
| C | -6.6631488 | 2.4954413  | -0.6401010 |
| C | -6.5980110 | 3.7179056  | -0.6407401 |
| H | -6.5634055 | 4.7903854  | -0.6433344 |

\*\*\*\*\*

#### Pentamer-31

|   |           |            |            |
|---|-----------|------------|------------|
| C | 0.2858478 | -1.0507587 | -2.2032872 |
| C | 0.3628146 | -0.7042128 | -0.8435186 |
| C | 0.3016015 | -0.0429348 | -3.1833614 |
| H | 0.3528019 | -1.4865661 | -0.0807601 |
| H | 0.2438175 | -0.3071295 | -4.2444806 |
| C | 0.4552688 | 0.6375408  | -0.4599646 |
| C | 0.3931803 | 1.3050264  | -2.8092055 |
| H | 0.5190004 | 0.9105594  | 0.5947897  |
| H | 0.4071166 | 2.0935603  | -3.5668978 |
| C | 0.4715588 | 1.6593435  | -1.4396618 |
| H | 0.2191030 | -2.1021718 | -2.4958876 |
| C | 0.5696350 | 3.0332183  | -1.0510694 |
| C | 0.6553243 | 4.2087480  | -0.7191386 |
| H | 0.7336637 | 5.2389443  | -0.4305130 |
| C | 3.7160344 | -1.1495694 | -0.6186413 |
| C | 3.7407090 | -0.8053180 | 0.7548846  |
| C | 3.7676730 | -0.1198800 | -1.5896889 |
| H | 3.7180676 | -1.6001195 | 1.5043123  |
| H | 3.7342089 | -0.3839826 | -2.6494759 |
| C | 3.8159490 | 0.5380216  | 1.1427492  |
| C | 3.8391842 | 1.2205225  | -1.1911763 |
| H | 3.8520360 | 0.7937025  | 2.2057324  |
| H | 3.8597616 | 2.0102831  | -1.9478542 |
| C | 3.8642317 | 1.5547841  | 0.1738317  |



|   |             |            |            |
|---|-------------|------------|------------|
| H | 3.9205091   | 2.6025453  | 0.4806067  |
| C | 3.6391426   | -2.5208979 | -1.0206639 |
| C | 3.5711251   | -3.6937179 | -1.3662487 |
| H | 3.5106950   | -4.7211168 | -1.6687577 |
| C | 7.0871832   | -2.0889088 | 2.0397691  |
| C | 7.1552850   | -0.7513424 | 2.4535891  |
| C | 7.0529273   | -2.4069488 | 0.6703330  |
| H | 7.1784533   | -0.4983845 | 3.5175551  |
| H | 6.9840019   | -3.4508793 | 0.3498181  |
| C | 7.1888330   | 0.2913600  | 1.4940615  |
| C | 7.0897055   | -1.3778354 | -0.2868081 |
| H | 7.0454625   | -1.6210747 | -1.3526400 |
| C | 7.1592470   | -0.0387360 | 0.1163479  |
| H | 7.0589507   | -2.8868896 | 2.7894951  |
| H | 7.1674815   | 0.7648148  | -0.6242154 |
| C | 7.2347094   | 1.6602859  | 1.9116410  |
| C | 7.2556030   | 2.8306992  | 2.2697702  |
| H | 7.2974537   | 3.8560822  | 2.5834610  |
| C | -3.1333554  | -3.1816640 | -0.5072550 |
| C | -3.0570695  | -1.9704284 | -0.3498149 |
| C | -2.9717450  | -0.5536486 | -0.1627502 |
| C | -3.0013067  | 0.3201693  | -1.2774549 |
| C | -2.8512739  | -0.0083582 | 1.1393371  |
| C | -2.9028376  | 1.7042375  | -1.0899075 |
| C | -2.7544913  | 1.3783801  | 1.3165981  |
| C | -2.7781643  | 2.2388051  | 0.2047648  |
| H | -3.2009096  | -4.2435456 | -0.6461659 |
| H | -3.0844290  | -0.1004721 | -2.2821517 |
| H | -2.8353870  | -0.6819592 | 2.0002698  |
| H | -2.9086683  | 2.3700992  | -1.9573948 |
| H | -2.6604112  | 1.7895069  | 2.3266069  |
| H | -2.6857786  | 3.3194103  | 0.3439457  |
| C | -11.3262495 | -1.5297800 | 1.5060384  |
| C | -10.2280785 | -1.0547398 | 1.2471845  |
| C | -8.9424791  | -0.4987856 | 0.9442414  |
| C | -7.8363671  | -1.3452038 | 0.6751692  |
| C | -8.7565194  | 0.9066333  | 0.9089624  |
| C | -6.5801115  | -0.7973429 | 0.3800966  |
| C | -7.4962013  | 1.4445808  | 0.6120875  |
| C | -6.4041248  | 0.5979685  | 0.3476874  |
| H | -12.2894048 | -1.9455327 | 1.7329966  |
| H | -7.9783768  | -2.4295413 | 0.7015177  |
| H | -9.6079755  | 1.5617621  | 1.1155290  |
| H | -5.7331814  | -1.4588628 | 0.1744795  |
| H | -7.3653348  | 2.5318730  | 0.5878275  |
| H | -5.4220079  | 1.0201500  | 0.1183878  |

\*\*\*\*\*

Pentamer-32

|   |            |            |           |
|---|------------|------------|-----------|
| C | -0.2856970 | -1.0557049 | 2.1907204 |
| C | -0.3624907 | -0.7037034 | 0.8323399 |

|   |            |            |            |
|---|------------|------------|------------|
| C | -0.3025000 | -0.0518634 | 3.1748306  |
| H | -0.3517203 | -1.4829419 | 0.0664051  |
| H | -0.2448672 | -0.3202886 | 4.2348867  |
| C | -0.4558415 | 0.6395107  | 0.4541803  |
| C | -0.3948960 | 1.2975404  | 2.8061010  |
| H | -0.5195199 | 0.9167694  | -0.5994789 |
| H | -0.4095602 | 2.0830100  | 3.5669536  |
| C | -0.4731037 | 1.6573413  | 1.4380011  |
| H | -0.2181758 | -2.1082327 | 2.4790503  |
| C | -0.5717931 | 3.0327236  | 1.0549275  |
| C | -0.6577799 | 4.2095797  | 0.7277596  |
| H | -0.7365239 | 5.2409124  | 0.4433440  |
| C | -3.7163451 | -1.1483150 | 0.6117221  |
| C | -3.7420518 | -0.8015656 | -0.7611551 |
| C | -3.7679947 | -0.1204386 | 1.5846743  |
| H | -3.7191171 | -1.5949747 | -1.5120510 |
| H | -3.7337154 | -0.3864629 | 2.6439516  |
| C | -3.8183843 | 0.5424417  | -1.1465116 |
| C | -3.8406231 | 1.2206429  | 1.1886679  |
| H | -3.8551412 | 0.8000643  | -2.2090050 |
| H | -3.8612411 | 2.0089937  | 1.9468123  |
| C | -3.8667780 | 1.5573926  | -0.1757026 |
| H | -3.9240522 | 2.6056728  | -0.4805152 |
| C | -3.6384586 | -2.5203336 | 1.0111957  |
| C | -3.5697081 | -3.6937572 | 1.3545497  |
| H | -3.5085769 | -4.7216962 | 1.6550852  |
| C | -7.0942548 | -2.0865602 | -2.0376012 |
| C | -7.1626800 | -0.7484511 | -2.4496018 |
| C | -7.0566622 | -2.4063058 | -0.6686427 |
| H | -7.1884547 | -0.4941796 | -3.5131959 |
| H | -6.9875224 | -3.4506688 | -0.3495917 |
| C | -7.1931917 | 0.2930936  | -1.4887170 |
| C | -7.0903820 | -1.3783419 | 0.2898409  |
| H | -7.0435073 | -1.6229047 | 1.3552580  |
| C | -7.1602206 | -0.0387109 | -0.1114974 |
| H | -7.0683605 | -2.8836352 | -2.7883745 |
| H | -7.1660831 | 0.7639284  | 0.6300752  |
| C | -7.2394594 | 1.6625603  | -1.9044908 |
| C | -7.2607509 | 2.8334212  | -2.2611131 |
| H | -7.3028900 | 3.8592123  | -2.5734352 |
| C | 3.1418181  | -3.1845500 | 0.5219314  |
| C | 3.0634864  | -1.9739525 | 0.3606314  |
| C | 2.9760864  | -0.5579022 | 0.1689773  |
| C | 3.0002469  | 0.3193536  | 1.2811097  |
| C | 2.8591990  | -0.0167826 | -1.1351675 |
| C | 2.9000984  | 1.7026805  | 1.0890196  |
| C | 2.7608453  | 1.3692427  | -1.3169924 |
| C | 2.7791844  | 2.2330926  | -0.2077156 |
| H | 3.2111088  | -4.2458783 | 0.6641980  |
| H | 3.0805317  | -0.0980885 | 2.2873712  |

|   |            |            |            |
|---|------------|------------|------------|
| H | 2.8474104  | -0.6930374 | -1.9940855 |
| H | 2.9015882  | 2.3711730  | 1.9544913  |
| H | 2.6696705  | 1.7771345  | -2.3285804 |
| H | 2.6856799  | 3.3131398  | -0.3505351 |
| C | 11.3266121 | -1.5218856 | -1.5202918 |
| C | 10.2291897 | -1.0482902 | -1.2556609 |
| C | 8.9444938  | -0.4939686 | -0.9459775 |
| C | 8.7571668  | 0.9112195  | -0.9088673 |
| C | 7.8406641  | -1.3417798 | -0.6719696 |
| C | 7.4977435  | 1.4475939  | -0.6054168 |
| C | 6.5852699  | -0.7954957 | -0.3703998 |
| C | 6.4079093  | 0.5995991  | -0.3362195 |
| H | 12.2891057 | -1.9364000 | -1.7522634 |
| H | 9.6068751  | 1.5674125  | -1.1192282 |
| H | 7.9837210  | -2.4259447 | -0.6997262 |
| H | 7.3658142  | 2.5347257  | -0.5798148 |
| H | 5.7400428  | -1.4580751 | -0.1612109 |
| H | 5.4264419  | 1.0205033  | -0.1018972 |

\*\*\*\*\*

#### Pentamer-33

|   |            |            |            |
|---|------------|------------|------------|
| C | -0.5811794 | -2.2994093 | 0.2101837  |
| C | -0.7230043 | -2.8079490 | -1.1068468 |
| C | -0.5415116 | -3.2113733 | 1.2962869  |
| C | -0.8178723 | -4.1891061 | -1.3278398 |
| C | -0.6397359 | -4.5916430 | 1.0664590  |
| C | -0.7767594 | -5.0869415 | -0.2443214 |
| C | -0.4709243 | -0.8913229 | 0.4306080  |
| C | -0.3446025 | 0.3132202  | 0.5957859  |
| H | -0.7594480 | -2.1071052 | -1.9446800 |
| H | -0.4321911 | -2.8244380 | 2.3127217  |
| H | -0.9289323 | -4.5683844 | -2.3479970 |
| H | -0.6085722 | -5.2855282 | 1.9119597  |
| H | -0.8514475 | -6.1639962 | -0.4200807 |
| H | -0.2431557 | 1.3734690  | 0.7284829  |
| C | -2.5951485 | 2.9964058  | 0.2390280  |
| C | -2.0654474 | 3.3946156  | 1.4931848  |
| C | -1.7995966 | 3.1611559  | -0.9240927 |
| C | -0.7728013 | 3.9331282  | 1.5770949  |
| C | -0.5086119 | 3.6983412  | -0.8282521 |
| C | 0.0119926  | 4.0858483  | 0.4194376  |
| C | -3.8987964 | 2.4104329  | 0.1507492  |
| C | -5.0041124 | 1.8910879  | 0.0748448  |
| H | -2.6733100 | 3.2645706  | 2.3929139  |
| H | -2.2015499 | 2.8470767  | -1.8913513 |
| H | -0.3709992 | 4.2276644  | 2.5518243  |
| H | 0.1068924  | 3.8050984  | -1.7260193 |
| H | 1.0240394  | 4.4916889  | 0.4868790  |
| H | -5.9567164 | 1.3992904  | 0.0093557  |
| C | -6.1511800 | -1.5418669 | -0.0678571 |
| C | -6.5698872 | -1.0933088 | -1.3467307 |

|   |            |            |            |
|---|------------|------------|------------|
| C | -6.8713395 | -1.1168968 | 1.0777516  |
| C | -7.6751357 | -0.2399350 | -1.4716499 |
| C | -7.9753101 | -0.2627147 | 0.9434690  |
| C | -8.3808477 | 0.1804014  | -0.3291285 |
| C | -5.0082155 | -2.3942989 | 0.0620580  |
| C | -4.0232885 | -3.1125708 | 0.1656413  |
| H | -6.0128834 | -1.4134444 | -2.2316263 |
| H | -6.5486980 | -1.4557410 | 2.0660992  |
| H | -7.9839386 | 0.1054380  | -2.4633986 |
| H | -8.5186317 | 0.0652237  | 1.8353573  |
| H | -9.2394767 | 0.8515767  | -0.4296089 |
| H | -3.1358263 | -3.7116056 | 0.2493949  |
| C | 3.0209363  | 0.2601896  | 0.0123436  |
| C | 3.1764309  | 1.4713962  | -0.0617130 |
| C | 3.3157542  | 2.8920346  | -0.1535485 |
| C | 3.0602625  | 3.5587574  | -1.3790900 |
| C | 3.6922739  | 3.6593418  | 0.9785686  |
| C | 3.1698647  | 4.9533057  | -1.4640808 |
| C | 3.8009029  | 5.0541940  | 0.8837549  |
| C | 3.5381359  | 5.7069838  | -0.3346438 |
| H | 2.8880633  | -0.8056494 | 0.0706215  |
| H | 2.7672758  | 2.9692512  | -2.2523630 |
| H | 3.8887506  | 3.1496185  | 1.9260246  |
| H | 2.9657876  | 5.4565944  | -2.4146557 |
| H | 4.0901889  | 5.6366240  | 1.7645749  |
| H | 3.6208355  | 6.7961253  | -0.4037828 |
| C | 2.7857390  | -3.5276102 | -0.2510741 |
| C | 3.9654939  | -3.2059733 | -0.1900912 |
| C | 5.3417051  | -2.8150169 | -0.1088731 |
| C | 6.2516728  | -3.5522162 | 0.6913961  |
| C | 5.8104681  | -1.6798505 | -0.8178832 |
| C | 7.5945840  | -3.1600246 | 0.7774358  |
| C | 7.1551892  | -1.2955263 | -0.7237131 |
| C | 8.0510622  | -2.0320421 | 0.0715529  |
| H | 1.7488874  | -3.8042353 | -0.2989257 |
| H | 5.8924757  | -4.4279656 | 1.2398769  |
| H | 5.1115252  | -1.1007068 | -1.4268074 |
| H | 8.2885511  | -3.7343185 | 1.4002288  |
| H | 7.5051682  | -0.4139396 | -1.2707201 |
| H | 9.1004522  | -1.7276238 | 0.1427970  |

\*\*\*\*\*

#### Pentamer-34 (P15)

|   |            |            |            |
|---|------------|------------|------------|
| C | -7.0382537 | -1.5559366 | 0.0182706  |
| C | -7.0430055 | -0.8478012 | 1.2324815  |
| C | -7.0548954 | -0.8525514 | -1.1985808 |
| H | -7.0203444 | -1.3905673 | 2.1827876  |
| H | -7.0416006 | -1.3990176 | -2.1469336 |
| C | -7.0657926 | 0.5534092  | 1.2354138  |
| C | -7.0777477 | 0.5486446  | -1.2067465 |
| H | -7.0626103 | 1.1083913  | 2.1775309  |

|   |            |            |            |
|---|------------|------------|------------|
| H | -7.0838817 | 1.0999556  | -2.1509994 |
| C | -7.0829046 | 1.2698320  | 0.0129781  |
| H | -7.0032776 | -2.6492655 | 0.0202247  |
| C | -7.1009584 | 2.7014566  | 0.0102632  |
| C | -7.1159269 | 3.9257297  | 0.0078782  |
| H | -7.1402111 | 4.9983721  | 0.0058089  |
| C | -3.5103470 | -3.2435488 | -0.0034477 |
| C | -3.5100209 | -2.5364130 | 1.2125479  |
| C | -3.5191745 | -2.5375913 | -1.2201077 |
| H | -3.5021164 | -3.0804470 | 2.1627508  |
| H | -3.5184747 | -3.0825480 | -2.1698167 |
| C | -3.5191505 | -1.1356138 | 1.2152301  |
| C | -3.5283721 | -1.1367822 | -1.2240916 |
| H | -3.5185320 | -0.5812973 | 2.1568615  |
| H | -3.5350116 | -0.5833923 | -2.1662557 |
| C | -3.5289845 | -0.4165526 | -0.0047533 |
| C | -3.5402386 | 1.0128177  | -0.0053695 |
| C | -3.5484367 | 2.2352678  | -0.0059254 |
| H | -3.5530501 | 3.3070279  | -0.0064528 |
| H | -3.5027255 | -4.3382480 | -0.0029621 |
| C | 0.0000581  | -1.5317333 | -0.0173840 |
| C | -0.0000075 | -0.8264056 | 1.1970648  |
| C | 0.0000598  | -0.8255749 | -1.2313474 |
| H | 0.0000129  | -1.3712910 | 2.1455163  |
| H | 0.0000854  | -1.3697483 | -2.1802286 |
| C | -0.0000719 | 0.5744193  | 1.2036477  |
| C | -0.0000189 | 0.5753018  | -1.2369166 |
| H | -0.0001387 | 1.1273873  | 2.1462992  |
| H | -0.0000198 | 1.1289254  | -2.1791965 |
| C | -0.0000877 | 1.2930633  | -0.0163721 |
| H | 0.0000984  | -2.6242628 | -0.0177508 |
| C | -0.0002167 | 2.7239155  | -0.0158503 |
| C | -0.0003771 | 3.9482410  | -0.0154089 |
| H | -0.0005520 | 5.0208648  | -0.0150441 |
| C | 3.5290335  | -0.4154376 | -0.0115551 |
| C | 3.5308660  | -1.1351155 | -1.2312414 |
| C | 3.5168791  | -1.1350616 | 1.2080575  |
| H | 3.5393586  | -0.5812876 | -2.1731460 |
| H | 3.5143200  | -0.5811756 | 2.1499265  |
| C | 3.5217402  | -2.5359295 | -1.2279227 |
| C | 3.5078963  | -2.5358574 | 1.2047095  |
| H | 3.5229550  | -3.0804458 | -2.1778852 |
| H | 3.4981882  | -3.0803248 | 2.1546436  |
| C | 3.5106212  | -3.2424377 | -0.0115873 |
| H | 3.5030965  | -4.3371370 | -0.0116379 |
| C | 3.5401292  | 1.0138828  | -0.0115180 |
| C | 3.5481652  | 2.2364278  | -0.0116246 |
| H | 3.5525934  | 3.3081310  | -0.0117870 |
| H | 7.1404739  | 4.9977784  | -0.0194937 |
| C | 7.1161384  | 3.9250281  | -0.0098215 |

|   |           |            |            |
|---|-----------|------------|------------|
| C | 7.1010099 | 2.7010473  | 0.0011217  |
| C | 7.0828645 | 1.2693406  | 0.0135119  |
| C | 7.0832828 | 0.5399215  | -1.2012950 |
| H | 7.0938273 | 1.0848460  | -2.1492113 |
| C | 7.0603811 | -0.8611976 | -1.1837605 |
| H | 7.0514207 | -1.4140908 | -2.1284243 |
| C | 7.0382374 | -1.5563186 | 0.0377238  |
| H | 7.0033302 | -2.6496130 | 0.0468945  |
| C | 7.0374360 | -0.8399619 | 1.2471326  |
| H | 7.0104569 | -1.3762756 | 2.2009928  |
| C | 7.0601474 | 0.5612189  | 1.2406965  |
| H | 7.0525417 | 1.1225478  | 2.1790196  |

\*\*\*\*\*

\*\*\*\*\*

**Hexamers**

\*\*\*\*\*

Hexamer-01 (H1)

|   |            |            |            |
|---|------------|------------|------------|
| C | 4.1560784  | 3.4650044  | 2.3990419  |
| C | 4.2185898  | 2.7624566  | 1.3989000  |
| C | 4.2399622  | 1.9164189  | 0.2443329  |
| C | 5.2146358  | 0.8958447  | 0.1095730  |
| C | 3.2553097  | 2.0696517  | -0.7632477 |
| C | 5.1974394  | 0.0484499  | -1.0069250 |
| C | 3.2472407  | 1.2171809  | -1.8750121 |
| C | 4.2155438  | 0.2056891  | -2.0019268 |
| H | 4.1147550  | 4.0946635  | 3.2663992  |
| H | 5.9662856  | 0.7674735  | 0.8932080  |
| H | 2.4939208  | 2.8442872  | -0.6538775 |
| H | 5.9440497  | -0.7468510 | -1.0932768 |
| H | 2.4747235  | 1.3265072  | -2.6394794 |
| H | 4.1866493  | -0.4619444 | -2.8674955 |
| C | 0.0878515  | 2.4629393  | 3.7104180  |
| C | 0.0779741  | 2.5936818  | 2.4939252  |
| C | 0.0414641  | 2.7487987  | 1.0713497  |
| C | -0.0685990 | 1.6195485  | 0.2219713  |
| C | 0.0932828  | 4.0450394  | 0.4967601  |
| C | -0.1423151 | 1.7894855  | -1.1657809 |
| C | 0.0192442  | 4.2029501  | -0.8942915 |
| C | -0.1055558 | 3.0759015  | -1.7283500 |
| H | 0.1029250  | 2.3412098  | 4.7759552  |
| H | -0.1034889 | 0.6199845  | 0.6550764  |
| H | 0.1887252  | 4.9155424  | 1.1510875  |
| H | -0.2357778 | 0.9171511  | -1.8098325 |
| H | 0.0565484  | 5.2069353  | -1.3276405 |
| H | -0.1673230 | 3.2000280  | -2.8135464 |
| C | 3.0322683  | -3.9693073 | -0.7850839 |
| C | 2.8170926  | -3.2437916 | 0.1765888  |
| C | 2.5722815  | -2.3841640 | 1.2947501  |

|   |            |            |            |
|---|------------|------------|------------|
| C | 2.4719388  | -0.9822803 | 1.1103231  |
| C | 2.4345733  | -2.9219961 | 2.5994648  |
| C | 2.2517529  | -0.1418175 | 2.2087193  |
| C | 2.2125954  | -2.0718314 | 3.6916492  |
| C | 2.1222569  | -0.6807947 | 3.4993997  |
| H | 3.2036212  | -4.5972864 | -1.6376409 |
| H | 2.5730860  | -0.5621674 | 0.1094862  |
| H | 2.4939567  | -4.0037174 | 2.7408250  |
| H | 2.1853918  | 0.9366781  | 2.0603956  |
| H | 2.1036109  | -2.4980574 | 4.6937172  |
| H | 1.9423562  | -0.0165054 | 4.3496608  |
| C | 2.5499835  | -0.2378214 | -5.3126166 |
| C | 1.6581141  | -0.5652520 | -4.5406241 |
| C | 0.6200332  | -0.9169883 | -3.6193526 |
| C | 0.9390915  | -1.4982180 | -2.3658985 |
| C | -0.7401020 | -0.6737406 | -3.9419143 |
| C | -0.0776980 | -1.8171302 | -1.4559465 |
| C | -1.7488153 | -0.9948208 | -3.0230111 |
| C | -1.4227889 | -1.5600457 | -1.7756948 |
| H | 3.3311964  | 0.0340261  | -5.9957731 |
| H | 1.9817633  | -1.6914533 | -2.1085689 |
| H | -0.9883422 | -0.2291986 | -4.9097105 |
| H | 0.1827585  | -2.2680319 | -0.4965425 |
| H | -2.7955178 | -0.7982036 | -3.2694907 |
| H | -2.2131259 | -1.7928460 | -1.0582191 |
| C | -0.2004988 | -5.0133185 | 1.0485382  |
| C | -0.9262619 | -4.0608855 | 1.2994516  |
| C | -1.7432521 | -2.9124722 | 1.5493302  |
| C | -1.1657282 | -1.7289870 | 2.0750400  |
| C | -3.1282798 | -2.9284009 | 1.2447598  |
| C | -1.9571502 | -0.5908105 | 2.2821447  |
| C | -3.9069080 | -1.7808021 | 1.4466686  |
| C | -3.3252962 | -0.6088807 | 1.9610866  |
| H | 0.4502507  | -5.8368291 | 0.8293964  |
| H | -0.1000668 | -1.7119912 | 2.3076990  |
| H | -3.5747617 | -3.8376054 | 0.8328562  |
| H | -1.4991897 | 0.3182471  | 2.6816356  |
| H | -4.9665015 | -1.7919733 | 1.1771161  |
| H | -3.9319300 | 0.2915879  | 2.0889376  |
| C | -5.2727917 | -1.5624711 | -2.2090372 |
| C | -5.1056838 | -0.5361730 | -1.5635484 |
| C | -4.9041154 | 0.6389671  | -0.7713027 |
| C | -5.9257158 | 1.0934754  | 0.1005626  |
| C | -3.6749661 | 1.3421894  | -0.8206770 |
| C | -5.7133816 | 2.2196887  | 0.9077343  |
| C | -3.4746760 | 2.4714220  | -0.0162849 |
| C | -4.4885009 | 2.9111229  | 0.8527323  |
| H | -5.4140737 | -2.4520554 | -2.7918775 |
| H | -6.8746275 | 0.5510383  | 0.1419542  |
| H | -2.8764135 | 0.9870609  | -1.4743071 |

|   |            |           |            |
|---|------------|-----------|------------|
| H | -6.5063236 | 2.5582631 | 1.5823760  |
| H | -2.5185076 | 2.9982362 | -0.0601614 |
| H | -4.3245888 | 3.7871603 | 1.4882347  |

-----  
Hexamer-02 (H5)

|   |            |            |            |
|---|------------|------------|------------|
| C | -4.4154072 | 1.4755404  | 3.5277239  |
| C | -4.4186472 | 0.8499510  | 2.4758282  |
| C | -4.3929163 | 0.1270640  | 1.2403687  |
| C | -5.1911770 | 0.5414803  | 0.1443338  |
| C | -3.5478773 | -1.0009312 | 1.0940460  |
| C | -5.1444897 | -0.1634465 | -1.0666275 |
| C | -3.5117052 | -1.6999389 | -0.1194022 |
| C | -4.3094176 | -1.2874915 | -1.2009182 |
| H | -4.4230888 | 2.0142548  | 4.4551430  |
| H | -5.8315831 | 1.4210590  | 0.2529382  |
| H | -2.9176258 | -1.3100174 | 1.9291105  |
| H | -5.7556555 | 0.1695656  | -1.9110315 |
| H | -2.8526600 | -2.5632499 | -0.2306488 |
| H | -4.2654854 | -1.8393363 | -2.1439770 |
| C | -0.2943845 | 2.1931323  | 3.9936920  |
| C | -0.3565528 | 1.0733782  | 3.5035332  |
| C | -0.4265240 | -0.2445572 | 2.9487236  |
| C | -0.0737178 | -0.4848653 | 1.5980022  |
| C | -0.8389346 | -1.3316419 | 3.7608842  |
| C | -0.1265272 | -1.7826530 | 1.0777675  |
| C | -0.8889760 | -2.6278157 | 3.2291729  |
| C | -0.5308866 | -2.8554781 | 1.8878890  |
| H | -0.2511869 | 3.1751442  | 4.4231591  |
| H | 0.2488585  | 0.3435395  | 0.9687665  |
| H | -1.1218823 | -1.1440526 | 4.8000107  |
| H | 0.1553163  | -1.9608429 | 0.0423280  |
| H | -1.2115051 | -3.4607941 | 3.8611629  |
| H | -0.5699688 | -3.8664734 | 1.4721649  |
| C | -2.1663470 | 1.2867935  | -4.3112191 |
| C | -1.9803495 | 1.8133731  | -3.2222456 |
| C | -1.7530991 | 2.4279514  | -1.9495249 |
| C | -1.9979515 | 1.7119526  | -0.7505091 |
| C | -1.2839077 | 3.7647569  | -1.8753289 |
| C | -1.7951288 | 2.3301217  | 0.4910016  |
| C | -1.0818160 | 4.3709259  | -0.6283387 |
| C | -1.3412074 | 3.6575676  | 0.5555904  |
| H | -2.3296383 | 0.8180847  | -5.2620928 |
| H | -2.3467869 | 0.6800060  | -0.8006722 |
| H | -1.0788481 | 4.3102664  | -2.8002906 |
| H | -1.9920994 | 1.7776395  | 1.4105568  |
| H | -0.7125824 | 5.3999265  | -0.5804342 |
| H | -1.1762752 | 4.1283368  | 1.5289878  |
| C | -2.8994218 | -4.5070848 | -2.5172922 |
| C | -1.9035830 | -3.7969593 | -2.4646430 |
| C | -0.7397843 | -2.9666564 | -2.3772879 |



|   |            |            |            |
|---|------------|------------|------------|
| C | -0.8448693 | -1.5592988 | -2.5164663 |
| C | 0.5346673  | -3.5460441 | -2.1425899 |
| C | 0.3006780  | -0.7566778 | -2.4258080 |
| C | 1.6716482  | -2.7317315 | -2.0482731 |
| C | 1.5586313  | -1.3365925 | -2.1895350 |
| H | -3.7724523 | -5.1283554 | -2.5736244 |
| H | -1.8202704 | -1.1013534 | -2.6904589 |
| H | 0.6138955  | -4.6314890 | -2.0336630 |
| H | 0.2150731  | 0.3247898  | -2.5465739 |
| H | 2.6526791  | -3.1752064 | -1.8603237 |
| H | 2.4481381  | -0.7079593 | -2.1140576 |
| C | 2.2928551  | 1.8510626  | -3.8541676 |
| C | 2.5300408  | 2.1251855  | -2.6860317 |
| C | 2.7948773  | 2.4414319  | -1.3153602 |
| C | 4.0913226  | 2.8460184  | -0.9057542 |
| C | 1.7588639  | 2.3630474  | -0.3518015 |
| C | 4.3371733  | 3.1689945  | 0.4361865  |
| C | 2.0154130  | 2.6852396  | 0.9871313  |
| C | 3.3010621  | 3.0898883  | 1.3854087  |
| H | 2.0695291  | 1.5959119  | -4.8718420 |
| H | 4.8928491  | 2.8993944  | -1.6475006 |
| H | 0.7581281  | 2.0609736  | -0.6646339 |
| H | 5.3407414  | 3.4779429  | 0.7440710  |
| H | 1.2094422  | 2.6144404  | 1.7212539  |
| H | 3.4996964  | 3.3334526  | 2.4336715  |
| C | 5.2745842  | -1.6763909 | -1.8778459 |
| C | 4.7458257  | -1.6746841 | -0.7738718 |
| C | 4.1007910  | -1.6768394 | 0.5043655  |
| C | 3.7230215  | -0.4560063 | 1.1175926  |
| C | 3.8292046  | -2.8989773 | 1.1701212  |
| C | 3.1014056  | -0.4637173 | 2.3727285  |
| C | 3.2054092  | -2.8929554 | 2.4254654  |
| C | 2.8441709  | -1.6775772 | 3.0318250  |
| H | 5.7438822  | -1.6730966 | -2.8425530 |
| H | 3.9140644  | 0.4856195  | 0.6004480  |
| H | 4.1125028  | -3.8418632 | 0.6935320  |
| H | 2.7950817  | 0.4819148  | 2.8271116  |
| H | 2.9936367  | -3.8403201 | 2.9310513  |
| H | 2.3364887  | -1.6774467 | 4.0003468  |

-----  
Hexamer-03 (H2)

|   |           |            |           |
|---|-----------|------------|-----------|
| C | 5.6263464 | -0.9601609 | 2.5878022 |
| C | 4.6154288 | -1.5790042 | 2.2832312 |
| C | 3.4145691 | -2.2595084 | 1.9034948 |
| C | 2.5108150 | -2.7399107 | 2.8841620 |
| C | 3.1005016 | -2.4280093 | 0.5319109 |
| C | 1.3212291 | -3.3717309 | 2.4963626 |
| C | 1.9097633 | -3.0627969 | 0.1552779 |
| C | 1.0175290 | -3.5372168 | 1.1330090 |
| H | 6.5223046 | -0.4351429 | 2.8563982 |

|   |            |            |            |
|---|------------|------------|------------|
| H | 2.7445123  | -2.5961781 | 3.9424667  |
| H | 3.7855677  | -2.0422554 | -0.2244045 |
| H | 0.6223255  | -3.7233844 | 3.2612878  |
| H | 1.6648991  | -3.1716188 | -0.9038981 |
| H | 0.0832156  | -4.0158090 | 0.8263882  |
| C | 4.7571105  | 2.8143995  | 0.4330407  |
| C | 4.4669245  | 1.8714369  | -0.2911611 |
| C | 4.1305887  | 0.7773423  | -1.1520201 |
| C | 2.7790260  | 0.5013105  | -1.4797837 |
| C | 5.1555843  | -0.0384131 | -1.6965387 |
| C | 2.4685753  | -0.5505189 | -2.3517115 |
| C | 4.8325024  | -1.0942415 | -2.5600371 |
| C | 3.4895918  | -1.3485352 | -2.8956157 |
| H | 5.0069493  | 3.6402886  | 1.0701266  |
| H | 1.9807558  | 1.1090244  | -1.0499143 |
| H | 6.1968570  | 0.1651358  | -1.4325588 |
| H | 1.4258664  | -0.7495078 | -2.6013109 |
| H | 5.6312257  | -1.7197409 | -2.9709170 |
| H | 3.2391710  | -2.1742081 | -3.5689594 |
| C | -2.4659291 | -0.9612249 | 2.0143412  |
| C | -1.4699691 | -0.2971970 | 2.2657234  |
| C | -0.3046950 | 0.4976312  | 2.5068711  |
| C | 0.9310653  | 0.1575303  | 1.9002925  |
| C | -0.3735801 | 1.6447613  | 3.3375894  |
| C | 2.0670817  | 0.9451502  | 2.1226979  |
| C | 0.7699714  | 2.4263016  | 3.5552032  |
| C | 1.9917110  | 2.0795298  | 2.9490287  |
| H | -3.3422011 | -1.5246536 | 1.7560003  |
| H | 0.9923099  | -0.7199546 | 1.2567362  |
| H | -1.3292912 | 1.9172878  | 3.7917966  |
| H | 3.0157898  | 0.6720569  | 1.6586980  |
| H | 0.7043320  | 3.3122529  | 4.1944670  |
| H | 2.8827949  | 2.6926021  | 3.1136195  |
| C | -0.8812405 | -4.7698677 | -1.9503183 |
| C | -0.9096800 | -3.5526949 | -2.0766517 |
| C | -0.9361252 | -2.1274377 | -2.2070667 |
| C | -0.8485694 | -1.3063757 | -1.0564605 |
| C | -1.0593965 | -1.5199353 | -3.4831147 |
| C | -0.8751618 | 0.0870032  | -1.1798593 |
| C | -1.0804991 | -0.1217246 | -3.5949398 |
| C | -0.9824436 | 0.6860711  | -2.4459372 |
| H | -0.8464197 | -5.8369191 | -1.8436316 |
| H | -0.7799977 | -1.7658217 | -0.0716068 |
| H | -1.1362336 | -2.1512127 | -4.3723822 |
| H | -0.8262431 | 0.7054119  | -0.2838386 |
| H | -1.1698345 | 0.3388103  | -4.5834861 |
| H | -0.9905461 | 1.7748925  | -2.5343826 |
| C | -3.2912190 | 2.6244347  | 0.9773177  |
| C | -2.3531349 | 3.0852902  | 0.3410909  |
| C | -1.2501459 | 3.5758999  | -0.4279789 |

|   |            |            |            |
|---|------------|------------|------------|
| C | 0.0824134  | 3.3037604  | -0.0269047 |
| C | -1.4739858 | 4.3090692  | -1.6217408 |
| C | 1.1596336  | 3.7451219  | -0.8068469 |
| C | -0.3895095 | 4.7420988  | -2.3980752 |
| C | 0.9291161  | 4.4593372  | -1.9963487 |
| H | -4.1216742 | 2.2039115  | 1.5143718  |
| H | 0.2604400  | 2.7402159  | 0.8892294  |
| H | -2.5005061 | 4.5222514  | -1.9329942 |
| H | 2.1823713  | 3.5242576  | -0.4882371 |
| H | -0.5742079 | 5.3022551  | -3.3206928 |
| H | 1.7731800  | 4.7953976  | -2.6069842 |
| C | -6.7874308 | 1.4853841  | 1.9550157  |
| C | -6.2811454 | 0.5921769  | 1.2879247  |
| C | -5.6458405 | -0.4431490 | 0.5297877  |
| C | -4.8050332 | -0.1178935 | -0.5644042 |
| C | -5.8258820 | -1.8053189 | 0.8831718  |
| C | -4.1504987 | -1.1315315 | -1.2756767 |
| C | -5.1620570 | -2.8116251 | 0.1655256  |
| C | -4.3190063 | -2.4786919 | -0.9111931 |
| H | -7.2581003 | 2.2654771  | 2.5219709  |
| H | -4.6488203 | 0.9306539  | -0.8280409 |
| H | -6.4752094 | -2.0578391 | 1.7260597  |
| H | -3.4883351 | -0.8677377 | -2.1032655 |
| H | -5.2988782 | -3.8591246 | 0.4522865  |
| H | -3.7815884 | -3.2623944 | -1.4532691 |

-----  
Hexamer-04 (H4)

|   |            |            |            |
|---|------------|------------|------------|
| C | -0.9459687 | -4.3728134 | 2.3005748  |
| C | -0.0100018 | -4.0296395 | 1.5909833  |
| C | 1.0783252  | -3.6121789 | 0.7599777  |
| C | 1.3164815  | -4.2366628 | -0.4916002 |
| C | 1.9318897  | -2.5616649 | 1.1809192  |
| C | 2.3812546  | -3.8124794 | -1.2997029 |
| C | 2.9934858  | -2.1476496 | 0.3664285  |
| C | 3.2217610  | -2.7669731 | -0.8745692 |
| H | -1.7598993 | -4.6714884 | 2.9319241  |
| H | 0.6582777  | -5.0458883 | -0.8196132 |
| H | 1.7520325  | -2.0768219 | 2.1409629  |
| H | 2.5465735  | -4.2886557 | -2.2706008 |
| H | 3.6394196  | -1.3308942 | 0.6954237  |
| H | 4.0405779  | -2.4191039 | -1.5100725 |
| C | -2.5025033 | -0.5754147 | 2.7110650  |
| C | -1.3181520 | -0.3744457 | 2.9419120  |
| C | 0.0766806  | -0.1362244 | 3.1538466  |
| C | 0.8067681  | 0.6747758  | 2.2470705  |
| C | 0.7538438  | -0.7295263 | 4.2498283  |
| C | 2.1809566  | 0.8761826  | 2.4301469  |
| C | 2.1300919  | -0.5243016 | 4.4217947  |
| C | 2.8474144  | 0.2755742  | 3.5124157  |
| H | -3.5367115 | -0.7282464 | 2.4630145  |

|   |            |            |            |
|---|------------|------------|------------|
| H | 0.2946910  | 1.1196098  | 1.3922342  |
| H | 0.1940920  | -1.3601073 | 4.9457057  |
| H | 2.7336529  | 1.4929346  | 1.7190372  |
| H | 2.6456412  | -0.9955194 | 5.2644279  |
| H | 3.9236402  | 0.4254363  | 3.6434858  |
| C | 2.0277656  | -1.2825439 | -4.5764728 |
| C | 1.1990028  | -0.8375440 | -3.7928858 |
| C | 0.2481686  | -0.3079252 | -2.8626857 |
| C | 0.1133189  | -0.8822779 | -1.5756409 |
| C | -0.5606120 | 0.8051150  | -3.2108842 |
| C | -0.8073238 | -0.3591268 | -0.6619798 |
| C | -1.4720943 | 1.3265288  | -2.2836743 |
| C | -1.5998675 | 0.7458454  | -1.0085629 |
| H | 2.7474839  | -1.6692780 | -5.2714563 |
| H | 0.7242180  | -1.7420933 | -1.3059760 |
| H | -0.4528049 | 1.2554714  | -4.2012465 |
| H | -0.9282284 | -0.8267650 | 0.3153483  |
| H | -2.0762149 | 2.1975404  | -2.5499153 |
| H | -2.3170819 | 1.1480354  | -0.2927925 |
| C | 6.1858964  | -0.5572405 | -0.7305423 |
| C | 5.3361509  | 0.3219894  | -0.6746597 |
| C | 4.3356152  | 1.3426257  | -0.5839176 |
| C | 3.0273456  | 1.1158241  | -1.0816905 |
| C | 4.6426784  | 2.5908581  | 0.0168058  |
| C | 2.0529367  | 2.1187116  | -0.9824355 |
| C | 3.6610844  | 3.5874940  | 0.1081989  |
| C | 2.3666618  | 3.3565263  | -0.3937221 |
| H | 6.9331428  | -1.3244449 | -0.7928211 |
| H | 2.7839686  | 0.1555449  | -1.5391102 |
| H | 5.6504534  | 2.7641974  | 0.4044632  |
| H | 1.0481806  | 1.9338442  | -1.3658958 |
| H | 3.9080024  | 4.5481733  | 0.5710071  |
| H | 1.6057797  | 4.1395745  | -0.3417721 |
| C | -0.3828913 | 5.2945928  | -1.9874552 |
| C | -1.0572984 | 4.7457459  | -1.1261200 |
| C | -1.8437675 | 4.0679100  | -0.1412460 |
| C | -3.2238224 | 3.8355583  | -0.3661452 |
| C | -1.2494126 | 3.5908046  | 1.0542847  |
| C | -3.9834213 | 3.1301074  | 0.5777540  |
| C | -2.0178302 | 2.8907453  | 1.9926926  |
| C | -3.3831401 | 2.6542773  | 1.7568165  |
| H | 0.2135251  | 5.7871072  | -2.7309124 |
| H | -3.6822240 | 4.1984929  | -1.2901849 |
| H | -0.1834269 | 3.7554295  | 1.2284333  |
| H | -5.0428269 | 2.9359582  | 0.3857017  |
| H | -1.5453049 | 2.4990757  | 2.8966036  |
| H | -3.9683734 | 2.0797443  | 2.4795772  |
| C | -5.8891715 | -0.5289496 | 1.1943591  |
| C | -5.1185208 | -1.0669181 | 0.4083382  |
| C | -4.2005166 | -1.6911701 | -0.4961591 |

|   |            |            |            |
|---|------------|------------|------------|
| C | -3.3325464 | -2.7173645 | -0.0451451 |
| C | -4.1437334 | -1.2853240 | -1.8532699 |
| C | -2.4403073 | -3.3257325 | -0.9360366 |
| C | -3.2449932 | -1.8985563 | -2.7352150 |
| C | -2.3934525 | -2.9200484 | -2.2809831 |
| H | -6.5969529 | -0.0843327 | 1.8669022  |
| H | -3.3451318 | -3.0156060 | 1.0058807  |
| H | -4.7989347 | -0.4811078 | -2.1985624 |
| H | -1.7629955 | -4.0982523 | -0.5644195 |
| H | -3.1928724 | -1.5627631 | -3.7748693 |
| H | -1.6754752 | -3.3783561 | -2.9674099 |

-----  
Hexamer-05 (H3)

|   |            |            |            |
|---|------------|------------|------------|
| C | -1.0330820 | -5.2274835 | 0.1393252  |
| C | -1.7753293 | -4.3527048 | 0.5651688  |
| C | -2.6093127 | -3.2936715 | 1.0476210  |
| C | -2.8042552 | -3.1025747 | 2.4388534  |
| C | -3.2235600 | -2.4016204 | 0.1334042  |
| C | -3.5965379 | -2.0419735 | 2.8999420  |
| C | -4.0113282 | -1.3434825 | 0.6054458  |
| C | -4.2030333 | -1.1604077 | 1.9864303  |
| H | -0.3950813 | -6.0047373 | -0.2337588 |
| H | -2.3175552 | -3.7810630 | 3.1445184  |
| H | -3.0617926 | -2.5374631 | -0.9375732 |
| H | -3.7290456 | -1.8948127 | 3.9762067  |
| H | -4.4664032 | -0.6464408 | -0.1018711 |
| H | -4.8117872 | -0.3233533 | 2.3399187  |
| C | 1.6824663  | -2.6194528 | -2.1407957 |
| C | 0.5422831  | -2.2406679 | -2.3744921 |
| C | -0.7864892 | -1.7741532 | -2.6341260 |
| C | -1.2482282 | -0.5636403 | -2.0581373 |
| C | -1.6586420 | -2.5156320 | -3.4715733 |
| C | -2.5394772 | -0.0974723 | -2.3342703 |
| C | -2.9544160 | -2.0474625 | -3.7308416 |
| C | -3.3962046 | -0.8345139 | -3.1691944 |
| H | 2.6752637  | -2.9458731 | -1.8881623 |
| H | -0.5993429 | 0.0007733  | -1.3877961 |
| H | -1.3098460 | -3.4561420 | -3.9068155 |
| H | -2.8787291 | 0.8364517  | -1.8845795 |
| H | -3.6207083 | -2.6303421 | -4.3745669 |
| H | -4.4082759 | -0.4710717 | -3.3736231 |
| C | -1.4155490 | 1.9290146  | 4.0243266  |
| C | -0.6856543 | 1.1745852  | 3.3946400  |
| C | 0.1601005  | 0.2921540  | 2.6495368  |
| C | -0.4012661 | -0.6269968 | 1.7270349  |
| C | 1.5673672  | 0.3281314  | 2.8232247  |
| C | 0.4297499  | -1.5003356 | 1.0132031  |
| C | 2.3889486  | -0.5441956 | 2.0978096  |
| C | 1.8220004  | -1.4640692 | 1.1979254  |
| H | -2.0615036 | 2.5867515  | 4.5726221  |

|   |            |            |            |
|---|------------|------------|------------|
| H | -1.4817798 | -0.6513553 | 1.5803854  |
| H | 2.0006500  | 1.0559830  | 3.5128019  |
| H | -0.0051651 | -2.2089272 | 0.3072814  |
| H | 3.4737795  | -0.4959549 | 2.2186433  |
| H | 2.4653479  | -2.1407377 | 0.6312704  |
| C | -6.4871365 | 1.6039174  | 0.7857245  |
| C | -5.3899151 | 1.9954310  | 0.4098841  |
| C | -4.1022730 | 2.4264474  | -0.0443543 |
| C | -2.9318057 | 2.0704439  | 0.6722867  |
| C | -3.9809358 | 3.2038859  | -1.2252256 |
| C | -1.6737979 | 2.4791314  | 0.2124041  |
| C | -2.7147492 | 3.5991633  | -1.6800062 |
| C | -1.5579574 | 3.2358886  | -0.9661647 |
| H | -7.4513728 | 1.2761306  | 1.1228912  |
| H | -3.0111085 | 1.4739794  | 1.5830535  |
| H | -4.8828270 | 3.4822630  | -1.7774056 |
| H | -0.7846406 | 2.2117388  | 0.7849251  |
| H | -2.6301351 | 4.1893435  | -2.5978075 |
| H | -0.5702777 | 3.5360848  | -1.3253344 |
| C | 1.4179400  | 3.8042296  | 2.2164121  |
| C | 1.6715274  | 3.4345874  | 1.0786901  |
| C | 1.9302302  | 2.9973937  | -0.2584736 |
| C | 1.6149278  | 1.6734558  | -0.6536694 |
| C | 2.4952598  | 3.8853450  | -1.2093586 |
| C | 1.8548333  | 1.2531296  | -1.9683947 |
| C | 2.7331578  | 3.4549394  | -2.5225595 |
| C | 2.4123006  | 2.1388919  | -2.9063129 |
| H | 1.1684189  | 4.0978255  | 3.2172033  |
| H | 1.1988895  | 0.9816004  | 0.0780723  |
| H | 2.7416872  | 4.9065913  | -0.9060584 |
| H | 1.6252977  | 0.2237325  | -2.2539416 |
| H | 3.1708894  | 4.1477596  | -3.2482075 |
| H | 2.6002137  | 1.8055842  | -3.9314887 |
| C | 4.8005664  | -3.9975606 | -0.7134349 |
| C | 4.9992675  | -2.8365344 | -0.3788044 |
| C | 5.2187505  | -1.4828893 | 0.0345210  |
| C | 5.9695966  | -1.2076600 | 1.2060609  |
| C | 4.6760103  | -0.4049758 | -0.7078373 |
| C | 6.1667829  | 0.1173930  | 1.6189388  |
| C | 4.8795021  | 0.9156297  | -0.2871452 |
| C | 5.6221859  | 1.1810781  | 0.8758108  |
| H | 4.6466692  | -5.0171190 | -1.0102590 |
| H | 6.3837470  | -2.0384135 | 1.7838831  |
| H | 4.0813857  | -0.6108959 | -1.6007429 |
| H | 6.7438836  | 0.3199598  | 2.5268077  |
| H | 4.4430523  | 1.7365512  | -0.8612243 |
| H | 5.7689499  | 2.2136971  | 1.2071772  |

-----  
Hexamer-06 (H7)

|   |            |           |           |
|---|------------|-----------|-----------|
| C | -5.1795750 | 0.2441908 | 3.1564941 |
|---|------------|-----------|-----------|

|   |            |            |            |
|---|------------|------------|------------|
| C | -4.9056566 | -0.3624162 | 2.1294659  |
| C | -4.5364272 | -1.0470638 | 0.9276135  |
| C | -5.2808542 | -0.8719001 | -0.2661128 |
| C | -3.3950807 | -1.8871699 | 0.9141286  |
| C | -4.8873569 | -1.5236532 | -1.4435270 |
| C | -3.0107574 | -2.5335994 | -0.2678139 |
| C | -3.7538387 | -2.3568498 | -1.4482405 |
| H | -5.4317847 | 0.7605813  | 4.0621410  |
| H | -6.1542176 | -0.2142824 | -0.2603060 |
| H | -2.8101815 | -2.0103019 | 1.8272569  |
| H | -5.4615384 | -1.3714239 | -2.3624968 |
| H | -2.1210368 | -3.1665160 | -0.2768071 |
| H | -3.4354970 | -2.8599824 | -2.3656271 |
| C | -1.4203307 | 2.0965206  | 4.0165563  |
| C | -1.1289348 | 0.9867006  | 3.5909562  |
| C | -0.7870410 | -0.3071707 | 3.0818371  |
| C | -0.2803366 | -0.4507788 | 1.7667803  |
| C | -0.9526378 | -1.4628391 | 3.8878257  |
| C | 0.0612358  | -1.7147971 | 1.2746648  |
| C | -0.6157091 | -2.7266236 | 3.3819623  |
| C | -0.1066973 | -2.8557078 | 2.0761111  |
| H | -1.6776969 | 3.0676911  | 4.3921741  |
| H | -0.1560531 | 0.4324212  | 1.1410140  |
| H | -1.3506096 | -1.3561965 | 4.9002907  |
| H | 0.4638489  | -1.8071737 | 0.2678251  |
| H | -0.7528739 | -3.6126822 | 4.0094711  |
| H | 0.1553923  | -3.8422826 | 1.6819863  |
| C | -2.2194098 | 0.7955102  | -4.3677677 |
| C | -2.2677490 | 1.3509856  | -3.2783965 |
| C | -2.3112558 | 1.9793639  | -1.9927984 |
| C | -2.4977282 | 1.1976634  | -0.8244610 |
| C | -2.1696718 | 3.3849774  | -1.8716307 |
| C | -2.5600813 | 1.8148872  | 0.4319729  |
| C | -2.2275455 | 3.9903356  | -0.6090933 |
| C | -2.4263735 | 3.2087645  | 0.5432710  |
| H | -2.1846402 | 0.3027805  | -5.3199381 |
| H | -2.5927995 | 0.1155611  | -0.9137650 |
| H | -2.0056024 | 3.9851908  | -2.7699739 |
| H | -2.7139858 | 1.2090278  | 1.3259272  |
| H | -2.1070786 | 5.0746633  | -0.5247127 |
| H | -2.4603184 | 3.6792651  | 1.5301584  |
| C | -1.2850326 | -4.9946348 | -2.5382157 |
| C | -0.5615217 | -4.0158620 | -2.4055740 |
| C | 0.2664527  | -2.8632394 | -2.2144498 |
| C | -0.2665265 | -1.5613226 | -2.3924578 |
| C | 1.6239424  | -3.0072591 | -1.8256806 |
| C | 0.5410659  | -0.4361818 | -2.1823094 |
| C | 2.4198922  | -1.8732701 | -1.6096230 |
| C | 1.8805657  | -0.5864490 | -1.7867793 |
| H | -1.9134811 | -5.8534097 | -2.6740356 |

|   |            |            |            |
|---|------------|------------|------------|
| H | -1.3098278 | -1.4356558 | -2.6877733 |
| H | 2.0365758  | -4.0104416 | -1.6874697 |
| H | 0.1257210  | 0.5603928  | -2.3352966 |
| H | 3.4571481  | -1.9907305 | -1.2882866 |
| H | 2.4987837  | 0.2960275  | -1.6093573 |
| C | 1.2624588  | 2.7909124  | -3.6695325 |
| C | 1.5227740  | 3.0295197  | -2.4982792 |
| C | 1.7945459  | 3.2895244  | -1.1175742 |
| C | 0.9371213  | 2.7651783  | -0.1186470 |
| C | 2.9060172  | 4.0801498  | -0.7281938 |
| C | 1.1852668  | 3.0275000  | 1.2346517  |
| C | 3.1485064  | 4.3342733  | 0.6292481  |
| C | 2.2908960  | 3.8085798  | 1.6138545  |
| H | 1.0185364  | 2.5604024  | -4.6880233 |
| H | 0.0728857  | 2.1715738  | -0.4180235 |
| H | 3.5681261  | 4.4875981  | -1.4972041 |
| H | 0.5084085  | 2.6287237  | 1.9958348  |
| H | 4.0106640  | 4.9425743  | 0.9201228  |
| H | 2.4866543  | 4.0050834  | 2.6725569  |
| C | 7.2997988  | -2.7836451 | -0.4952405 |
| C | 6.3854323  | -2.1453972 | 0.0102358  |
| C | 5.3052585  | -1.4014145 | 0.5851378  |
| C | 5.0718246  | -0.0575847 | 0.1952295  |
| C | 4.4399497  | -2.0046467 | 1.5340177  |
| C | 4.0012033  | 0.6607662  | 0.7451507  |
| C | 3.3702660  | -1.2782323 | 2.0738515  |
| C | 3.1500741  | 0.0535947  | 1.6832715  |
| H | 8.1090787  | -3.3385088 | -0.9294685 |
| H | 5.7324598  | 0.4053487  | -0.5432496 |
| H | 4.6148771  | -3.0429936 | 1.8296336  |
| H | 3.8216446  | 1.6927581  | 0.4350472  |
| H | 2.6933267  | -1.7552846 | 2.7879426  |
| H | 2.3086447  | 0.6133175  | 2.0966380  |

-----  
Hexamer-07 (H6)

|   |           |            |            |
|---|-----------|------------|------------|
| C | 6.0187572 | -0.0325758 | 1.5355884  |
| C | 5.1957494 | -0.9130358 | 1.3247453  |
| C | 4.2092382 | -1.9170313 | 1.0638885  |
| C | 3.9175406 | -2.9183430 | 2.0256850  |
| C | 3.4951722 | -1.9074328 | -0.1604902 |
| C | 2.9247613 | -3.8749418 | 1.7681755  |
| C | 2.5071363 | -2.8681266 | -0.4074819 |
| C | 2.2133397 | -3.8502963 | 0.5542237  |
| H | 6.7387082 | 0.7418745  | 1.7144126  |
| H | 4.4648832 | -2.9258304 | 2.9722373  |
| H | 3.7140791 | -1.1399592 | -0.9033069 |
| H | 2.6963936 | -4.6330033 | 2.5237167  |
| H | 1.9529200 | -2.8458124 | -1.3481335 |
| H | 1.4237991 | -4.5814036 | 0.3582452  |
| C | 4.0040788 | 3.1379733  | 0.5988709  |



|   |            |            |            |
|---|------------|------------|------------|
| C | 3.7115180  | 2.4110266  | -0.3402202 |
| C | 3.3701051  | 1.5296088  | -1.4146399 |
| C | 2.0383164  | 1.0686734  | -1.5758767 |
| C | 4.3708020  | 1.0802660  | -2.3139977 |
| C | 1.7204611  | 0.1783948  | -2.6102589 |
| C | 4.0432712  | 0.1851393  | -3.3417801 |
| C | 2.7193884  | -0.2689610 | -3.4922104 |
| H | 4.2448204  | 3.7697063  | 1.4311043  |
| H | 1.2676449  | 1.3944331  | -0.8763971 |
| H | 5.3998497  | 1.4252744  | -2.1835577 |
| H | 0.6934408  | -0.1773708 | -2.7159421 |
| H | 4.8253463  | -0.1646177 | -4.0227963 |
| H | 2.4692154  | -0.9749597 | -4.2902099 |
| C | -1.1616820 | -3.1761359 | 3.5099938  |
| C | -0.7647506 | -2.0663144 | 3.1793540  |
| C | -0.2907960 | -0.7766964 | 2.7764309  |
| C | 1.0016286  | -0.6445513 | 2.2098771  |
| C | -1.0994545 | 0.3782995  | 2.9302175  |
| C | 1.4709746  | 0.6123105  | 1.8078209  |
| C | -0.6241171 | 1.6290586  | 2.5134172  |
| C | 0.6590961  | 1.7519761  | 1.9495334  |
| H | -1.5071862 | -4.1429390 | 3.8204444  |
| H | 1.6241531  | -1.5309513 | 2.0867325  |
| H | -2.1001414 | 0.2829200  | 3.3580460  |
| H | 2.4712686  | 0.7013067  | 1.3790562  |
| H | -1.2646476 | 2.5090962  | 2.6089715  |
| H | 1.0157750  | 2.7269931  | 1.6063808  |
| C | -0.1013820 | -4.8717352 | -2.1450222 |
| C | -0.4921402 | -3.7143699 | -2.0648624 |
| C | -0.9578806 | -2.3639759 | -1.9725289 |
| C | -0.7704193 | -1.6156551 | -0.7840327 |
| C | -1.6339694 | -1.7679712 | -3.0679305 |
| C | -1.2644519 | -0.3082458 | -0.6893598 |
| C | -2.1264768 | -0.4607888 | -2.9609401 |
| C | -1.9511133 | 0.2687249  | -1.7703525 |
| H | 0.2524726  | -5.8817688 | -2.2184095 |
| H | -0.2495235 | -2.0683352 | 0.0604727  |
| H | -1.7752614 | -2.3435397 | -3.9867661 |
| H | -1.1258342 | 0.2521583  | 0.2355660  |
| H | -2.6581847 | -0.0121667 | -3.8055472 |
| H | -2.3621869 | 1.2758653  | -1.6759098 |
| C | -3.7365558 | 2.8655639  | 0.0675470  |
| C | -2.6406238 | 3.4102843  | 0.0752579  |
| C | -1.3496516 | 4.0271773  | 0.0889267  |
| C | -1.0065667 | 4.9513450  | 1.1070335  |
| C | -0.3887217 | 3.7104684  | -0.9045510 |
| C | 0.2670493  | 5.5373532  | 1.1300978  |
| C | 0.8798485  | 4.3026571  | -0.8743925 |
| C | 1.2133583  | 5.2154777  | 0.1411029  |
| H | -4.6966573 | 2.3831243  | 0.0133698  |

|   |            |            |            |
|---|------------|------------|------------|
| H | -1.7447775 | 5.1955351  | 1.8760123  |
| H | -0.6396434 | 2.9893134  | -1.6862523 |
| H | 0.5210418  | 6.2463953  | 1.9245156  |
| H | 1.6209688  | 4.0317632  | -1.6304228 |
| H | 2.2133934  | 5.6576996  | 0.1677218  |
| C | -7.0171319 | 1.2991374  | -0.8192718 |
| C | -6.2549806 | 0.4060177  | -0.4699611 |
| C | -5.3387346 | -0.6129704 | -0.0551986 |
| C | -4.9403881 | -1.6328395 | -0.9563534 |
| C | -4.8131306 | -0.6094657 | 1.2616314  |
| C | -4.0416808 | -2.6244704 | -0.5445485 |
| C | -3.9137774 | -1.6059691 | 1.6618163  |
| C | -3.5246065 | -2.6123924 | 0.7620965  |
| H | -7.7071348 | 2.0622177  | -1.1240695 |
| H | -5.3340677 | -1.6281034 | -1.9762433 |
| H | -5.1138011 | 0.1806688  | 1.9554027  |
| H | -3.7207256 | -3.3931697 | -1.2527519 |
| H | -3.4985144 | -1.5999329 | 2.6724765  |
| H | -2.7969668 | -3.3651513 | 1.0767617  |

-----  
Hexamer-08 (H8)

|   |            |            |            |
|---|------------|------------|------------|
| C | -6.3177964 | 1.1374075  | -0.3451584 |
| C | -5.5693394 | 0.2179106  | -0.6488046 |
| C | -4.6538099 | -0.8308591 | -0.9821778 |
| C | -4.4330591 | -1.2005676 | -2.3325494 |
| C | -3.9282596 | -1.4876813 | 0.0426746  |
| C | -3.5063387 | -2.2050373 | -2.6448746 |
| C | -3.0063785 | -2.4921405 | -0.2801618 |
| C | -2.7928374 | -2.8553810 | -1.6217223 |
| H | -6.9917784 | 1.9285028  | -0.0796385 |
| H | -4.9795053 | -0.6823320 | -3.1250598 |
| H | -4.0819605 | -1.1900327 | 1.0811901  |
| H | -3.3316111 | -2.4720997 | -3.6916244 |
| H | -2.4373481 | -2.9827282 | 0.5129090  |
| H | -2.0594831 | -3.6307184 | -1.8606617 |
| C | -3.1540760 | 3.7157801  | 1.8798179  |
| C | -3.0449213 | 2.5385210  | 2.1959037  |
| C | -2.9027889 | 1.1646699  | 2.5749020  |
| C | -1.7692852 | 0.4166511  | 2.1674637  |
| C | -3.8932759 | 0.5404790  | 3.3758885  |
| C | -1.6206144 | -0.9143319 | 2.5776295  |
| C | -3.7388865 | -0.7950163 | 3.7729101  |
| C | -2.5991050 | -1.5228497 | 3.3824225  |
| H | -3.2454460 | 4.7482366  | 1.6040736  |
| H | -1.0146812 | 0.8796347  | 1.5296184  |
| H | -4.7755563 | 1.1118904  | 3.6765353  |
| H | -0.7415216 | -1.4769390 | 2.2612493  |
| H | -4.5104404 | -1.2680906 | 4.3884649  |
| H | -2.4807771 | -2.5653161 | 3.6940749  |
| C | 0.6942175  | -1.0231802 | -3.7431842 |

|   |            |            |            |
|---|------------|------------|------------|
| C | 0.0205125  | -0.1048918 | -3.2950291 |
| C | -0.7658136 | 0.9629549  | -2.7551668 |
| C | -1.6511072 | 0.7236770  | -1.6741186 |
| C | -0.6710454 | 2.2704839  | -3.2945899 |
| C | -2.4191748 | 1.7690551  | -1.1480953 |
| C | -1.4478844 | 3.3095021  | -2.7637527 |
| C | -2.3219619 | 3.0619061  | -1.6889277 |
| H | 1.2751762  | -1.8355266 | -4.1339369 |
| H | -1.7347203 | -0.2787174 | -1.2553703 |
| H | 0.0231652  | 2.4602993  | -4.1161549 |
| H | -3.0987738 | 1.5759863  | -0.3175279 |
| H | -1.3635567 | 4.3159021  | -3.1852858 |
| H | -2.9217849 | 3.8732553  | -1.2665272 |
| C | -0.4621188 | -5.4158870 | -0.0669525 |
| C | 0.0706191  | -4.3518538 | 0.2211551  |
| C | 0.6641213  | -3.0957081 | 0.5665233  |
| C | 0.4676333  | -1.9619591 | -0.2607206 |
| C | 1.4447977  | -2.9659079 | 1.7431706  |
| C | 1.0301481  | -0.7298117 | 0.0895893  |
| C | 2.0023623  | -1.7253057 | 2.0823227  |
| C | 1.7928564  | -0.6033262 | 1.2616826  |
| H | -0.9236719 | -6.3509217 | -0.3190246 |
| H | -0.1152312 | -2.0577149 | -1.1768135 |
| H | 1.6038187  | -3.8415279 | 2.3779849  |
| H | 0.8861533  | 0.1338558  | -0.5602029 |
| H | 2.6062080  | -1.6338564 | 2.9895413  |
| H | 2.2278940  | 0.3609636  | 1.5272532  |
| C | 2.8577357  | 2.2920815  | -2.8965401 |
| C | 2.6112266  | 2.4823879  | -1.7135311 |
| C | 2.3240240  | 2.6846749  | -0.3258766 |
| C | 0.9849184  | 2.8596230  | 0.1071753  |
| C | 3.3699726  | 2.7020157  | 0.6314645  |
| C | 0.7038551  | 3.0526530  | 1.4662951  |
| C | 3.0762764  | 2.8877560  | 1.9895936  |
| C | 1.7459030  | 3.0643880  | 2.4115805  |
| H | 3.0628748  | 2.1139374  | -3.9337290 |
| H | 0.1774615  | 2.8375308  | -0.6264970 |
| H | 4.4035182  | 2.5518987  | 0.3125469  |
| H | -0.3325073 | 3.1939184  | 1.7860832  |
| H | 3.8916191  | 2.8841227  | 2.7194196  |
| H | 1.5197666  | 3.2043117  | 3.4733024  |
| C | 6.9175249  | 1.2619834  | 1.4287320  |
| C | 6.2539902  | 0.4119413  | 0.8483408  |
| C | 5.4437657  | -0.5596523 | 0.1770740  |
| C | 4.6949242  | -0.1928045 | -0.9686187 |
| C | 5.3621381  | -1.8908946 | 0.6569790  |
| C | 3.8697163  | -1.1290413 | -1.6024642 |
| C | 4.5424052  | -2.8237743 | 0.0067684  |
| C | 3.7913834  | -2.4464642 | -1.1197082 |
| H | 7.5292253  | 1.9933005  | 1.9206689  |

|   |           |            |            |
|---|-----------|------------|------------|
| H | 4.7442082 | 0.8302971  | -1.3444368 |
| H | 5.9365746 | -2.1772615 | 1.5425289  |
| H | 3.2589923 | -0.8138737 | -2.4530571 |
| H | 4.4727058 | -3.8450929 | 0.3933410  |
| H | 3.1248134 | -3.1691968 | -1.5987646 |

-----  
Hexamer-09 (H9)

|   |            |            |            |
|---|------------|------------|------------|
| C | 1.8947846  | -0.2749943 | 3.4601580  |
| C | 1.8323141  | 0.1884720  | 2.1225319  |
| C | 2.7921757  | -1.3214908 | 3.7872920  |
| C | 2.6406422  | -0.3876099 | 1.1351324  |
| C | 3.5956488  | -1.8932109 | 2.7906417  |
| C | 3.5217942  | -1.4327452 | 1.4641403  |
| C | 0.4423130  | -2.9014341 | 0.4319180  |
| C | -0.2061765 | -1.8628676 | -0.2844877 |
| C | 0.1797017  | -3.0529616 | 1.8161865  |
| C | -1.1046799 | -1.0109750 | 0.3691270  |
| C | -0.7179706 | -2.1922819 | 2.4613803  |
| C | -1.3672300 | -1.1772294 | 1.7395208  |
| C | 1.3612673  | -3.7798168 | -0.2238136 |
| C | 2.1526390  | -4.5313883 | -0.7772997 |
| C | 1.0359557  | 0.2933902  | 4.4549212  |
| C | 0.2732014  | 0.7713167  | 5.2851582  |
| H | 1.1270763  | 0.9842552  | 1.8798475  |
| H | 2.8432852  | -1.6809644 | 4.8190015  |
| H | 2.5767445  | -0.0390126 | 0.1014889  |
| H | 4.2787446  | -2.7088657 | 3.0487597  |
| H | 0.0031778  | -1.7327427 | -1.3486718 |
| H | 0.6958257  | -3.8393377 | 2.3723732  |
| H | -1.6152559 | -0.2247388 | -0.1893141 |
| H | -0.9014563 | -2.3064688 | 3.5335782  |
| H | -2.0902838 | -0.5232090 | 2.2296278  |
| H | 2.8785153  | -5.1479907 | -1.2696738 |
| H | -0.3747496 | 1.2090502  | 6.0194896  |
| H | 4.1347772  | -1.8965493 | 0.6881838  |
| C | 4.3885640  | -1.3855044 | -2.1046048 |
| C | 3.0067540  | -1.4050071 | -2.4233873 |
| C | 5.0918404  | -0.1549873 | -2.1508731 |
| C | 2.3528449  | -0.2204389 | -2.7878991 |
| C | 4.4261860  | 1.0226275  | -2.5178064 |
| C | 3.0586880  | 0.9941626  | -2.8410370 |
| C | 5.0724853  | -2.5870658 | -1.7299482 |
| C | 5.6720003  | -3.5996518 | -1.3926344 |
| H | 2.4601431  | -2.3475557 | -2.3592814 |
| H | 6.1554567  | -0.1379283 | -1.8968805 |
| H | 1.2834072  | -0.2355642 | -3.0184947 |
| H | 4.9748470  | 1.9694540  | -2.5460146 |
| H | 6.2000492  | -4.4883374 | -1.1058517 |
| H | 2.5398418  | 1.9169480  | -3.1099310 |
| C | -2.0486268 | 0.9232414  | -2.6979490 |

|   |            |            |            |
|---|------------|------------|------------|
| C | -1.1089158 | 1.6200416  | -2.3399235 |
| C | -0.0123599 | 2.4303790  | -1.9051053 |
| C | 0.3591425  | 3.5926849  | -2.6260465 |
| C | 0.7164191  | 2.0757696  | -0.7444689 |
| C | 1.4376831  | 4.3758193  | -2.1897820 |
| C | 1.7919003  | 2.8618977  | -0.3187205 |
| C | 2.1578147  | 4.0122576  | -1.0374675 |
| H | -2.8909698 | 0.3241225  | -2.9950475 |
| H | -0.2022595 | 3.8684213  | -3.5228525 |
| H | 0.4232485  | 1.1809667  | -0.1955211 |
| H | 1.7189716  | 5.2707928  | -2.7538880 |
| H | 2.3494356  | 2.5737164  | 0.5749311  |
| H | 3.0001282  | 4.6248177  | -0.7016973 |
| C | -4.0965390 | 0.9302850  | 0.7278062  |
| C | -3.2113550 | 1.7324535  | 0.9921456  |
| C | -2.1647389 | 2.6652836  | 1.2830512  |
| C | -1.2554643 | 2.4316301  | 2.3458675  |
| C | -2.0189700 | 3.8391475  | 0.5008413  |
| C | -0.2370765 | 3.3540004  | 2.6212047  |
| C | -1.0003510 | 4.7567265  | 0.7860502  |
| C | -0.1081359 | 4.5198403  | 1.8464052  |
| H | -4.8410869 | 0.1970404  | 0.4802275  |
| H | -1.3387282 | 1.5259691  | 2.9497134  |
| H | -2.7035444 | 4.0094901  | -0.3339683 |
| H | 0.4605510  | 3.1468776  | 3.4380834  |
| H | -0.8902420 | 5.6507661  | 0.1650648  |
| H | 0.6946777  | 5.2335246  | 2.0555709  |
| C | -4.8674899 | -0.8867298 | -4.2536314 |
| C | -4.9669086 | -1.2664401 | -3.0939793 |
| C | -5.0768685 | -1.7034183 | -1.7347755 |
| C | -6.3044721 | -1.5689963 | -1.0357812 |
| C | -3.9615240 | -2.2708000 | -1.0698155 |
| C | -6.4078351 | -2.0023705 | 0.2937293  |
| C | -4.0753027 | -2.7022114 | 0.2587063  |
| C | -5.2960694 | -2.5722492 | 0.9432845  |
| H | -4.7841393 | -0.5638488 | -5.2735824 |
| H | -7.1639107 | -1.1241249 | -1.5446098 |
| H | -3.0075286 | -2.3600360 | -1.5944077 |
| H | -7.3581363 | -1.8921827 | 0.8254935  |
| H | -3.2002803 | -3.1198106 | 0.7631256  |
| H | -5.3801327 | -2.9039743 | 1.9827635  |

-----  
Hexamer-10 (H10)

|   |            |            |            |
|---|------------|------------|------------|
| C | -2.8825229 | -0.2713914 | -2.6202086 |
| C | -3.5865132 | -1.4870810 | -2.5798828 |
| C | -2.9663277 | 0.6259730  | -1.5424731 |
| H | -3.5043632 | -2.1982451 | -3.4072344 |
| H | -2.4053561 | 1.5628536  | -1.5624087 |
| C | -4.3736780 | -1.8096373 | -1.4673528 |
| C | -3.7578623 | 0.3186200  | -0.4286387 |

|   |            |            |            |
|---|------------|------------|------------|
| H | -4.9081964 | -2.7623069 | -1.4224500 |
| H | -3.8245955 | 1.0150252  | 0.4094188  |
| C | -4.4691137 | -0.9069326 | -0.3786885 |
| H | -2.2407522 | -0.0371614 | -3.4740711 |
| C | -5.2624829 | -1.2354579 | 0.7673619  |
| C | -5.9077846 | -1.5206929 | 1.7692224  |
| H | -6.5147231 | -1.7583893 | 2.6213957  |
| C | -0.3437783 | -1.9654011 | -1.3667522 |
| C | -0.3080069 | -3.0475939 | -2.2804397 |
| C | -1.0351868 | -2.1165658 | -0.1419908 |
| H | 0.2397402  | -2.9341638 | -3.2190330 |
| H | -1.0773223 | -1.2898676 | 0.5662971  |
| C | -0.9617947 | -4.2479113 | -1.9740124 |
| C | -1.6871009 | -3.3187370 | 0.1538244  |
| H | -0.9292912 | -5.0791771 | -2.6856658 |
| H | -2.2261904 | -3.4154419 | 1.1003224  |
| C | -1.6567852 | -4.3867180 | -0.7588109 |
| H | -2.1706640 | -5.3245559 | -0.5249756 |
| C | 0.2903083  | -0.7260460 | -1.6952143 |
| C | 0.7969853  | 0.3455582  | -1.9968824 |
| H | 1.2409417  | 1.2836191  | -2.2694680 |
| C | 1.2918229  | -3.5225569 | 2.4698564  |
| C | 1.8893900  | -2.2903760 | 2.1548675  |
| C | 1.2859860  | -4.5607230 | 1.5207853  |
| H | 1.8815379  | -1.4712320 | 2.8781731  |
| H | 0.8042218  | -5.5155074 | 1.7537380  |
| C | 2.4784257  | -2.0936732 | 0.8996698  |
| C | 1.8823300  | -4.3770518 | 0.2670218  |
| H | 2.9172938  | -1.1289633 | 0.6458166  |
| H | 1.8689551  | -5.1770195 | -0.4773595 |
| C | 2.4896511  | -3.1384169 | -0.0565104 |
| H | 0.8187103  | -3.6690575 | 3.4460066  |
| C | 3.0922038  | -2.9405821 | -1.3400062 |
| C | 3.6056606  | -2.7713049 | -2.4383545 |
| H | 4.0524652  | -2.6243314 | -3.4022118 |
| C | -2.5292210 | -0.2550603 | 2.7468395  |
| C | -1.3765397 | 0.1479070  | 2.8224967  |
| C | -0.0214288 | 0.6054897  | 2.8593388  |
| C | 0.6751985  | 0.8459821  | 1.6486733  |
| C | 0.6467347  | 0.8100350  | 4.0929036  |
| C | 2.0058136  | 1.2794294  | 1.6735339  |
| C | 1.9820056  | 1.2379214  | 4.1071087  |
| C | 2.6651295  | 1.4736682  | 2.8994769  |
| H | -3.5428019 | -0.5967774 | 2.6364372  |
| H | 0.1711760  | 0.6817821  | 0.6954684  |
| H | 0.1113319  | 0.6240418  | 5.0279375  |
| H | 2.5364208  | 1.4514658  | 0.7345997  |
| H | 2.4912436  | 1.3877076  | 5.0645499  |
| H | 3.7073280  | 1.8039088  | 2.9099717  |
| C | -4.6961174 | 3.4676857  | 2.0588991  |

|   |            |            |            |
|---|------------|------------|------------|
| C | -3.8061488 | 3.6096624  | 1.2313133  |
| C | -2.7672225 | 3.7316132  | 0.2537667  |
| C | -1.4571491 | 3.2729041  | 0.5424517  |
| C | -3.0399791 | 4.2879232  | -1.0215728 |
| C | -0.4477052 | 3.3727127  | -0.4242286 |
| C | -2.0227612 | 4.3810670  | -1.9818753 |
| C | -0.7248974 | 3.9254350  | -1.6866888 |
| H | -5.4724268 | 3.3545513  | 2.7906503  |
| H | -1.2495444 | 2.8257150  | 1.5167199  |
| H | -4.0527893 | 4.6312479  | -1.2491467 |
| H | 0.5564412  | 3.0083246  | -0.1935997 |
| H | -2.2465257 | 4.8057728  | -2.9656860 |
| H | 0.0702041  | 3.9924358  | -2.4348033 |
| C | 2.5915160  | 3.3850197  | -3.4149703 |
| C | 3.2513919  | 2.8487118  | -2.5341160 |
| C | 4.0036057  | 2.2000977  | -1.5029712 |
| C | 4.5792954  | 2.9575021  | -0.4507312 |
| C | 4.1782679  | 0.7926167  | -1.5212184 |
| C | 5.3176387  | 2.3163051  | 0.5531336  |
| C | 4.9240099  | 0.1638918  | -0.5151583 |
| C | 5.4937035  | 0.9209305  | 0.5235279  |
| H | 2.0513936  | 3.8604395  | -4.2106303 |
| H | 4.4377211  | 4.0415283  | -0.4312927 |
| H | 3.7146910  | 0.1966111  | -2.3102586 |
| H | 5.7542820  | 2.9081448  | 1.3635466  |
| H | 5.0447187  | -0.9221833 | -0.5442851 |
| H | 6.0661739  | 0.4238132  | 1.3126304  |

-----  
Hexamer-11 (H11)

|   |            |            |            |
|---|------------|------------|------------|
| C | -0.2643635 | 5.2422612  | -0.6855339 |
| C | -0.8770975 | 4.2209955  | -0.4033461 |
| C | -1.5747206 | 3.0161658  | -0.0688287 |
| C | -2.6711368 | 2.5707281  | -0.8521154 |
| C | -1.1665712 | 2.2442146  | 1.0476320  |
| C | -3.3335683 | 1.3790592  | -0.5261099 |
| C | -1.8331733 | 1.0522103  | 1.3611250  |
| C | -2.9147820 | 0.6137680  | 0.5777305  |
| H | 0.2802383  | 6.1329921  | -0.9303172 |
| H | -2.9846992 | 3.1621562  | -1.7169693 |
| H | -0.3226405 | 2.5807282  | 1.6517785  |
| H | -4.1708639 | 1.0408153  | -1.1404169 |
| H | -1.5033160 | 0.4571694  | 2.2155631  |
| H | -3.4168392 | -0.3269086 | 0.8175569  |
| C | 3.3882869  | 3.7085451  | -1.0285520 |
| C | 2.9540632  | 3.2475919  | 0.0180969  |
| C | 2.4579915  | 2.7052319  | 1.2463778  |
| C | 2.2196840  | 1.3136504  | 1.3820537  |
| C | 2.1913362  | 3.5628484  | 2.3440725  |
| C | 1.7347555  | 0.7965374  | 2.5908160  |
| C | 1.7029598  | 3.0357904  | 3.5474009  |

|   |            |            |            |
|---|------------|------------|------------|
| C | 1.4754584  | 1.6527075  | 3.6748204  |
| H | 3.7441453  | 4.1051016  | -1.9592141 |
| H | 2.3984746  | 0.6539372  | 0.5322695  |
| H | 2.3602327  | 4.6373514  | 2.2346914  |
| H | 1.5466893  | -0.2745093 | 2.6825875  |
| H | 1.4958773  | 3.7065068  | 4.3871577  |
| H | 1.0881435  | 1.2445935  | 4.6134905  |
| C | -2.5049508 | -2.4541438 | -1.7606943 |
| C | -1.4419707 | -1.9007158 | -2.0092575 |
| C | -0.1846355 | -1.2451823 | -2.2077026 |
| C | -0.0121404 | 0.0937173  | -1.7751440 |
| C | 0.9140102  | -1.9342808 | -2.7822964 |
| C | 1.2319601  | 0.7231053  | -1.9109291 |
| C | 2.1573507  | -1.2985788 | -2.9004858 |
| C | 2.3228229  | 0.0279787  | -2.4622375 |
| H | -3.4341518 | -2.9165684 | -1.4897978 |
| H | -0.8512595 | 0.6207667  | -1.3207345 |
| H | 0.7857922  | -2.9709196 | -3.1061209 |
| H | 1.3566494  | 1.7535915  | -1.5700561 |
| H | 3.0090408  | -1.8473699 | -3.3112005 |
| H | 3.3037427  | 0.5064313  | -2.5310720 |
| C | -2.8866517 | -1.9086220 | 3.3052834  |
| C | -1.7238945 | -2.1126825 | 2.9826615  |
| C | -0.3661563 | -2.3429593 | 2.5895865  |
| C | 0.0380318  | -2.1137009 | 1.2491897  |
| C | 0.5866997  | -2.8054019 | 3.5330469  |
| C | 1.3629023  | -2.3608306 | 0.8613925  |
| C | 1.9082885  | -3.0498096 | 3.1342876  |
| C | 2.2970657  | -2.8372191 | 1.7984243  |
| H | -3.9108248 | -1.7240254 | 3.5633330  |
| H | -0.6919548 | -1.7472939 | 0.5260675  |
| H | 0.2766535  | -2.9731987 | 4.5683517  |
| H | 1.6640210  | -2.1875112 | -0.1745835 |
| H | 2.6363206  | -3.4135937 | 3.8663016  |
| H | 3.3213237  | -3.0512766 | 1.4826935  |
| C | 4.2700131  | -4.1163874 | -0.9926615 |
| C | 4.6632184  | -2.9597932 | -1.0631936 |
| C | 5.1055650  | -1.6022779 | -1.1625167 |
| C | 5.7944255  | -1.1593405 | -2.3192838 |
| C | 4.8404282  | -0.6779848 | -0.1209754 |
| C | 6.2059835  | 0.1767535  | -2.4263719 |
| C | 5.2570528  | 0.6536666  | -0.2366416 |
| C | 5.9396633  | 1.0857483  | -1.3867652 |
| H | 3.9267059  | -5.1298930 | -0.9146598 |
| H | 5.9932952  | -1.8689824 | -3.1274007 |
| H | 4.2906765  | -1.0069689 | 0.7636736  |
| H | 6.7352819  | 0.5097738  | -3.3249325 |
| H | 5.0274220  | 1.3645486  | 0.5604560  |
| H | 6.2503403  | 2.1310977  | -1.4746315 |
| C | -4.9861066 | -3.0567204 | 0.8323344  |



|   |            |            |            |
|---|------------|------------|------------|
| C | -5.4823216 | -2.1279552 | 0.2083376  |
| C | -6.0204016 | -1.0141175 | -0.5116174 |
| C | -6.5995605 | 0.0745194  | 0.1878956  |
| C | -5.9555471 | -0.9684587 | -1.9273322 |
| C | -7.0983892 | 1.1795945  | -0.5140290 |
| C | -6.4573560 | 0.1419561  | -2.6203855 |
| C | -7.0297684 | 1.2179272  | -1.9181802 |
| H | -4.5278169 | -3.8551612 | 1.3834415  |
| H | -6.6392051 | 0.0469171  | 1.2801870  |
| H | -5.4987310 | -1.7984217 | -2.4722342 |
| H | -7.5362833 | 2.0183971  | 0.0359707  |
| H | -6.3980469 | 0.1702240  | -3.7128539 |
| H | -7.4167513 | 2.0850622  | -2.4626574 |

---

Hexamer-12 (H12)

|   |            |            |            |
|---|------------|------------|------------|
| C | -1.3533476 | -0.7961901 | -3.3626021 |
| C | -1.5528000 | -0.0594081 | -2.1688724 |
| C | -2.2437304 | -1.8524809 | -3.6786160 |
| C | -2.6128236 | -0.3766973 | -1.3096324 |
| C | -3.3004060 | -2.1628444 | -2.8124860 |
| C | -3.4879209 | -1.4299535 | -1.6272654 |
| C | -0.6104247 | -2.8522731 | -0.0256042 |
| C | -0.0225098 | -1.7953607 | 0.7158594  |
| C | -0.0436350 | -3.2162486 | -1.2720819 |
| C | 1.1046078  | -1.1298713 | 0.2201476  |
| C | 1.0809498  | -2.5379373 | -1.7621388 |
| C | 1.6584098  | -1.4955492 | -1.0187236 |
| C | -1.7713174 | -3.5265443 | 0.4686075  |
| C | -2.7674886 | -4.0985718 | 0.8903937  |
| C | -0.2520023 | -0.4963666 | -4.2265393 |
| C | 0.7016016  | -0.2544075 | -4.9553101 |
| H | -0.8590120 | 0.7455331  | -1.9245904 |
| H | -2.0889066 | -2.4245570 | -4.5977943 |
| H | -2.7520198 | 0.1833417  | -0.3812305 |
| H | -3.9763615 | -2.9880590 | -3.0581310 |
| H | -0.4622472 | -1.4968586 | 1.6704919  |
| H | -0.5042270 | -4.0191259 | -1.8526696 |
| H | 1.5571774  | -0.3249541 | 0.8009397  |
| H | 1.4960509  | -2.8123200 | -2.7356340 |
| H | 2.5452090  | -0.9738434 | -1.3866707 |
| H | -3.6877641 | -4.5245349 | 1.2393963  |
| H | 1.5295185  | -0.0237939 | -5.5972385 |
| H | -4.2996650 | -1.6923342 | -0.9463651 |
| C | -4.9647913 | -0.9305212 | 1.6152818  |
| C | -3.7184078 | -0.9607195 | 2.2903635  |
| C | -5.4819762 | 0.3140303  | 1.1747074  |
| C | -3.0212375 | 0.2300769  | 2.5336401  |
| C | -4.7749176 | 1.4986876  | 1.4231021  |
| C | -3.5482302 | 1.4628726  | 2.1085089  |
| C | -5.6962482 | -2.1372233 | 1.3696387  |

|   |            |            |            |
|---|------------|------------|------------|
| C | -6.3329027 | -3.1586324 | 1.1452119  |
| H | -3.3030874 | -1.9220547 | 2.5999606  |
| H | -6.4357924 | 0.3369474  | 0.6401990  |
| H | -2.0550979 | 0.2000281  | 3.0451174  |
| H | -5.1814145 | 2.4538570  | 1.0759366  |
| H | -6.9029939 | -4.0490086 | 0.9625605  |
| H | -2.9946810 | 2.3867287  | 2.2926401  |
| C | 1.0439170  | 0.4253873  | 3.5308713  |
| C | 0.5240227  | 1.2843246  | 2.8316004  |
| C | -0.1341424 | 2.2829672  | 2.0454232  |
| C | -0.3808699 | 3.5677688  | 2.5923682  |
| C | -0.5767712 | 1.9963424  | 0.7308526  |
| C | -1.0615497 | 4.5352704  | 1.8397652  |
| C | -1.2546284 | 2.9694598  | -0.0113700 |
| C | -1.5002746 | 4.2384810  | 0.5364103  |
| H | 1.5452143  | -0.3158509 | 4.1201722  |
| H | -0.0418700 | 3.7905829  | 3.6077015  |
| H | -0.3952152 | 1.0081116  | 0.3099408  |
| H | -1.2510565 | 5.5223544  | 2.2732322  |
| H | -1.5862029 | 2.7417143  | -1.0258632 |
| H | -2.0262909 | 4.9968710  | -0.0510095 |
| C | 3.7311194  | 1.2514034  | 0.4555693  |
| C | 3.0083880  | 1.9158925  | -0.2740617 |
| C | 2.1638329  | 2.6945340  | -1.1282299 |
| C | 1.4878968  | 2.0891344  | -2.2176639 |
| C | 1.9885676  | 4.0815455  | -0.8948070 |
| C | 0.6625597  | 2.8554925  | -3.0516064 |
| C | 1.1612917  | 4.8392733  | -1.7340056 |
| C | 0.4972634  | 4.2317500  | -2.8151392 |
| H | 4.3432923  | 0.6434220  | 1.0941508  |
| H | 1.6026743  | 1.0187439  | -2.4014972 |
| H | 2.4964751  | 4.5483598  | -0.0467629 |
| H | 0.1471466  | 2.3654738  | -3.8824848 |
| H | 1.0282979  | 5.9082089  | -1.5388445 |
| H | -0.1482534 | 4.8280185  | -3.4681739 |
| C | 6.2695720  | -2.7727801 | -1.6684959 |
| C | 5.8949674  | -2.4180382 | -0.5589063 |
| C | 5.4423928  | -1.9938947 | 0.7315123  |
| C | 4.1441078  | -2.3394172 | 1.1817882  |
| C | 6.2766199  | -1.2082542 | 1.5681155  |
| C | 3.6889215  | -1.8978838 | 2.4312769  |
| C | 5.8142434  | -0.7768332 | 2.8198239  |
| C | 4.5190358  | -1.1173149 | 3.2545377  |
| H | 6.6039929  | -3.0916050 | -2.6369252 |
| H | 3.4915390  | -2.9296405 | 0.5355528  |
| H | 7.2775731  | -0.9364525 | 1.2221339  |
| H | 2.6733120  | -2.1535276 | 2.7459873  |
| H | 6.4634792  | -0.1659898 | 3.4547456  |
| H | 4.1613051  | -0.7641805 | 4.2266745  |

---

### Hexamer-13 (H13)

|   |            |            |            |
|---|------------|------------|------------|
| C | -0.6987361 | -0.7280262 | -2.4710121 |
| C | -0.4116205 | -2.0912886 | -2.2731481 |
| C | -1.1666702 | 0.0529806  | -1.3999258 |
| H | -0.0336170 | -2.6988865 | -3.1000396 |
| H | -1.3978885 | 1.1096149  | -1.5458050 |
| C | -0.5828098 | -2.6734785 | -1.0108651 |
| C | -1.3425034 | -0.5211116 | -0.1350694 |
| H | -0.3330107 | -3.7232842 | -0.8458474 |
| H | -1.7108162 | 0.0765761  | 0.6959507  |
| C | -1.0460578 | -1.8889530 | 0.0737158  |
| H | -0.5477104 | -0.2758189 | -3.4557627 |
| C | -1.2215258 | -2.4694522 | 1.3703397  |
| C | -1.3830057 | -2.9516713 | 2.4842013  |
| H | -1.5525649 | -3.3928132 | 3.4471747  |
| C | 2.8678727  | -1.6555608 | -1.3164283 |
| C | 2.9568521  | -3.0075726 | -1.7340905 |
| C | 2.5584009  | -1.3695411 | 0.0341475  |
| H | 3.2034442  | -3.2291438 | -2.7759965 |
| H | 2.5149890  | -0.3372378 | 0.3776687  |
| C | 2.7316856  | -4.0436092 | -0.8190080 |
| C | 2.3246994  | -2.4116717 | 0.9383551  |
| H | 2.8062582  | -5.0844539 | -1.1500908 |
| H | 2.0690725  | -2.1713482 | 1.9732851  |
| C | 2.4088080  | -3.7494252 | 0.5191043  |
| H | 2.2201865  | -4.5611442 | 1.2283659  |
| C | 3.0871502  | -0.6007502 | -2.2584888 |
| C | 3.2575952  | 0.2841068  | -3.0865101 |
| H | 3.4483521  | 1.0582905  | -3.8030382 |
| C | 4.3070824  | 1.1007216  | 2.2059799  |
| C | 4.5982304  | 1.5350282  | 0.9008463  |
| C | 4.7743009  | -0.1494726 | 2.6486452  |
| H | 4.2216345  | 2.4992433  | 0.5504075  |
| H | 4.5449342  | -0.4929716 | 3.6624403  |
| C | 5.3428400  | 0.7222805  | 0.0361349  |
| C | 5.5230727  | -0.9676878 | 1.7924166  |
| H | 5.5441095  | 1.0397134  | -0.9894678 |
| H | 5.8761941  | -1.9472251 | 2.1258789  |
| C | 5.8113102  | -0.5426156 | 0.4715684  |
| H | 3.6987914  | 1.7250712  | 2.8659805  |
| C | 6.5479408  | -1.3892681 | -0.4170347 |
| C | 7.1704949  | -2.1184603 | -1.1777076 |
| H | 7.7236565  | -2.7538296 | -1.8417690 |
| C | 0.3962964  | 0.4144094  | 2.5392017  |
| C | 0.8154871  | 1.3220567  | 1.8354997  |
| C | 1.3147096  | 2.3590081  | 0.9874652  |
| C | 1.4810685  | 2.1253042  | -0.3996738 |
| C | 1.6547585  | 3.6272701  | 1.5203970  |
| C | 1.9858683  | 3.1352215  | -1.2273046 |
| C | 2.1564004  | 4.6333743  | 0.6829559  |

|   |            |            |            |
|---|------------|------------|------------|
| C | 2.3267944  | 4.3906563  | -0.6937612 |
| H | -0.0304944 | -0.4118680 | 3.0754344  |
| H | 1.2159137  | 1.1561528  | -0.8213596 |
| H | 1.5243037  | 3.8097306  | 2.5905168  |
| H | 2.1192528  | 2.9332401  | -2.2934444 |
| H | 2.4178427  | 5.6086178  | 1.1048089  |
| H | 2.7233345  | 5.1773577  | -1.3428901 |
| C | -4.2570720 | 0.8008893  | 2.3630711  |
| C | -3.8167670 | 1.5189016  | 1.4762900  |
| C | -3.2837763 | 2.3065171  | 0.4075647  |
| C | -2.0773217 | 3.0302106  | 0.5781502  |
| C | -3.9356361 | 2.3339315  | -0.8514957 |
| C | -1.5362242 | 3.7647611  | -0.4854508 |
| C | -3.3919404 | 3.0793531  | -1.9066246 |
| C | -2.1927745 | 3.7953873  | -1.7291625 |
| H | -4.6813469 | 0.1356471  | 3.0907227  |
| H | -1.5606525 | 2.9852008  | 1.5393713  |
| H | -4.8476004 | 1.7481982  | -0.9920345 |
| H | -0.5916037 | 4.2970617  | -0.3460129 |
| H | -3.8991782 | 3.0916112  | -2.8768295 |
| H | -1.7664624 | 4.3668440  | -2.5598539 |
| C | -6.4784570 | -2.1817938 | 3.0804504  |
| C | -6.2204035 | -1.9176996 | 1.9128270  |
| C | -5.9039513 | -1.5864224 | 0.5559153  |
| C | -4.6378697 | -1.9204050 | 0.0139926  |
| C | -6.8481112 | -0.9084198 | -0.2557477 |
| C | -4.3289730 | -1.5897900 | -1.3120056 |
| C | -6.5291983 | -0.5806104 | -1.5808739 |
| C | -5.2718831 | -0.9220714 | -2.1130174 |
| H | -6.7228572 | -2.4394182 | 4.0929111  |
| H | -3.8990812 | -2.4204193 | 0.6443531  |
| H | -7.8224073 | -0.6428756 | 0.1640893  |
| H | -3.3447409 | -1.8424846 | -1.7142286 |
| H | -7.2648857 | -0.0560899 | -2.1995770 |
| H | -5.0239880 | -0.6589709 | -3.1464157 |

-----  
Hexamer-14 (H14)

|   |           |           |            |
|---|-----------|-----------|------------|
| C | 3.2727912 | 2.3468754 | -2.0446729 |
| C | 3.2357769 | 3.5399309 | -1.3014327 |
| C | 3.5505443 | 1.1298188 | -1.3994228 |
| H | 3.0032032 | 4.4872803 | -1.7962061 |
| H | 3.5778133 | 0.1966285 | -1.9688563 |
| C | 3.4674891 | 3.5190423 | 0.0792238  |
| C | 3.7842655 | 1.0955952 | -0.0183146 |
| H | 3.4110650 | 4.4398048 | 0.6648665  |
| H | 3.9813051 | 0.1511341 | 0.4898028  |
| C | 3.7384727 | 2.2929433 | 0.7369164  |
| H | 3.0625055 | 2.3646042 | -3.1176765 |
| C | 3.9281104 | 2.2621194 | 2.1559456  |
| C | 4.0470222 | 2.2323922 | 3.3748174  |

|   |            |            |            |
|---|------------|------------|------------|
| H | 4.1982291  | 2.2274959  | 4.4368576  |
| C | -0.0739434 | 2.7948605  | -1.0867159 |
| C | -0.3395673 | 4.1859021  | -1.0517194 |
| C | 0.2901097  | 2.1305177  | 0.1075798  |
| H | -0.6376675 | 4.6969835  | -1.9705780 |
| H | 0.4857726  | 1.0606985  | 0.0967488  |
| C | -0.2340098 | 4.8909713  | 0.1543650  |
| C | 0.3951432  | 2.8426047  | 1.3059815  |
| H | -0.4472793 | 5.9645027  | 0.1735610  |
| H | 0.6874707  | 2.3125476  | 2.2157138  |
| C | 0.1370246  | 4.2232453  | 1.3359741  |
| H | 0.2222864  | 4.7784422  | 2.2753821  |
| C | -0.1741920 | 2.0712925  | -2.3171196 |
| C | -0.2548215 | 1.4604394  | -3.3746377 |
| H | -0.3456678 | 0.9260977  | -4.2995554 |
| C | -2.1736961 | 0.0301145  | 1.4633776  |
| C | -2.3389530 | -0.0537549 | 0.0716533  |
| C | -2.5723695 | 1.1913597  | 2.1467169  |
| H | -2.0387197 | -0.9558929 | -0.4606050 |
| H | -2.4384666 | 1.2642966  | 3.2304540  |
| C | -2.8978649 | 1.0126517  | -0.6378116 |
| C | -3.1331925 | 2.2672238  | 1.4448665  |
| H | -3.0101086 | 0.9558089  | -1.7217957 |
| H | -3.4327021 | 3.1790536  | 1.9682596  |
| C | -3.2998715 | 2.1899619  | 0.0400623  |
| H | -1.7278959 | -0.8046468 | 2.0086015  |
| C | -3.8632700 | 3.2859939  | -0.6877138 |
| C | -4.3432097 | 4.2205631  | -1.3165364 |
| H | -4.7620233 | 5.0426636  | -1.8635298 |
| C | 1.7933067  | -0.5611661 | 2.1988753  |
| C | 1.2052389  | -1.1791966 | 1.3233059  |
| C | 0.5195776  | -1.8520097 | 0.2648789  |
| C | 0.7044515  | -1.4324137 | -1.0747571 |
| C | -0.3666262 | -2.9230259 | 0.5379543  |
| C | 0.0200218  | -2.0750635 | -2.1131577 |
| C | -1.0472445 | -3.5591933 | -0.5073123 |
| C | -0.8545640 | -3.1408158 | -1.8369617 |
| H | 2.3665293  | 0.0010854  | 2.9111212  |
| H | 1.3726018  | -0.5979264 | -1.2911106 |
| H | -0.5383991 | -3.2314122 | 1.5715403  |
| H | 0.1644682  | -1.7337237 | -3.1419122 |
| H | -1.7482965 | -4.3643779 | -0.2734218 |
| H | -1.3933211 | -3.6355458 | -2.6509672 |
| C | 5.4037651  | -1.5698312 | 2.4607256  |
| C | 4.9103468  | -2.1056875 | 1.4775679  |
| C | 4.3245035  | -2.6855113 | 0.3079113  |
| C | 3.3319114  | -3.6909541 | 0.4145908  |
| C | 4.7195867  | -2.2406181 | -0.9791704 |
| C | 2.7535255  | -4.2366113 | -0.7382217 |
| C | 4.1341273  | -2.7925408 | -2.1265816 |

|   |            |            |            |
|---|------------|------------|------------|
| C | 3.1515055  | -3.7919023 | -2.0104923 |
| H | 5.8404474  | -1.0976401 | 3.3190970  |
| H | 3.0076143  | -4.0156410 | 1.4061711  |
| H | 5.4761425  | -1.4560405 | -1.0621828 |
| H | 1.9676546  | -4.9910796 | -0.6436344 |
| H | 4.4447811  | -2.4392109 | -3.1152855 |
| H | 2.6870375  | -4.2127394 | -2.9073366 |
| C | -3.3201607 | -4.2865321 | 2.3786849  |
| C | -3.9024491 | -3.4894913 | 1.6541472  |
| C | -4.5639001 | -2.5406789 | 0.8106666  |
| C | -5.1917763 | -1.4001415 | 1.3721876  |
| C | -4.5837788 | -2.7161015 | -0.5952114 |
| C | -5.8155653 | -0.4585948 | 0.5450995  |
| C | -5.2122671 | -1.7689155 | -1.4146722 |
| C | -5.8267380 | -0.6378008 | -0.8490951 |
| H | -2.8374402 | -4.9985192 | 3.0197836  |
| H | -5.1614646 | -1.2534333 | 2.4546566  |
| H | -4.0936967 | -3.5897241 | -1.0320425 |
| H | -6.2725703 | 0.4315120  | 0.9871062  |
| H | -5.2150879 | -1.9092177 | -2.5004339 |
| H | -6.2981623 | 0.1109952  | -1.4928043 |

-----  
Hexamer-15 (H15)

|   |           |            |            |
|---|-----------|------------|------------|
| C | 5.2012912 | -1.5791032 | -0.3013952 |
| C | 5.3411899 | -0.7558575 | -1.4319838 |
| C | 4.9860031 | -1.0007165 | 0.9611760  |
| H | 5.4906128 | -1.2034151 | -2.4188233 |
| H | 4.8913320 | -1.6381445 | 1.8449740  |
| C | 5.2695585 | 0.6368410  | -1.3060117 |
| C | 4.9084348 | 0.3908604  | 1.0976662  |
| H | 5.3633702 | 1.2800049  | -2.1843856 |
| H | 4.7533138 | 0.8457815  | 2.0790153  |
| C | 5.0508654 | 1.2263990  | -0.0368408 |
| H | 5.2555359 | -2.6664255 | -0.4043597 |
| C | 4.9705943 | 2.6490861  | 0.0968595  |
| C | 4.8988819 | 3.8659313  | 0.2109717  |
| H | 4.8333251 | 4.9321577  | 0.3104838  |
| C | 2.0420425 | -0.9649552 | -2.2631604 |
| C | 2.1517066 | -0.1566539 | -3.4214220 |
| C | 1.8570953 | -0.3455528 | -1.0034422 |
| H | 2.2932599 | -0.6341367 | -4.3952562 |
| H | 1.7726513 | -0.9679962 | -0.1109057 |
| C | 2.0770831 | 1.2394051  | -3.3148943 |
| C | 1.7838723 | 1.0478742  | -0.9088118 |
| H | 2.1627500 | 1.8559154  | -4.2156633 |
| H | 1.6422480 | 1.5179038  | 0.0672293  |
| C | 1.8934761 | 1.8458120  | -2.0601718 |
| H | 1.8340235 | 2.9344147  | -1.9779508 |
| C | 2.1170685 | -2.3905717 | -2.3648483 |
| C | 2.1811175 | -3.6102746 | -2.4531684 |

|   |            |            |            |
|---|------------|------------|------------|
| H | 2.2371238  | -4.6785975 | -2.5316327 |
| C | -1.4843578 | -1.8088274 | -1.0453720 |
| C | -1.3705263 | -1.0915908 | -2.2487985 |
| C | -1.6568768 | -1.1173239 | 0.1659402  |
| H | -1.2184800 | -1.6257705 | -3.1911636 |
| H | -1.7637539 | -1.6726023 | 1.1020837  |
| C | -1.4304925 | 0.3075108  | -2.2466481 |
| C | -1.7140956 | 0.2818069  | 0.1796082  |
| H | -1.3273434 | 0.8696799  | -3.1779121 |
| H | -1.8624499 | 0.8228169  | 1.1172027  |
| C | -1.6023368 | 1.0107016  | -1.0294604 |
| H | -1.4385609 | -2.9014234 | -1.0518063 |
| C | -1.6624921 | 2.4404698  | -1.0209845 |
| C | -1.7146374 | 3.6638472  | -1.0131574 |
| H | -1.7584106 | 4.7355710  | -1.0056031 |
| C | 8.2576898  | -0.8620101 | 1.9554882  |
| C | 8.4199488  | -0.2061037 | 0.7097965  |
| C | 8.0649841  | -0.0835765 | 3.1241873  |
| H | 8.5531947  | -0.8049096 | -0.1946392 |
| H | 7.9401815  | -0.5877649 | 4.0869704  |
| C | 8.3818526  | 1.1918491  | 0.6386867  |
| C | 8.0296135  | 1.3154973  | 3.0419305  |
| H | 8.4876889  | 1.6872228  | -0.3309641 |
| H | 7.8759933  | 1.9073602  | 3.9503996  |
| C | 8.1862382  | 1.9578840  | 1.8010819  |
| H | 8.1403378  | 3.0492405  | 1.7370752  |
| C | 8.2690301  | -2.2922582 | 2.0293971  |
| C | 8.2586743  | -3.5146337 | 2.0899280  |
| H | 8.2728867  | -4.5863498 | 2.1466822  |
| C | -5.0597090 | -1.2829980 | 0.2162691  |
| C | -4.9329358 | -0.6370056 | -1.0378390 |
| C | -5.2365586 | -0.4986650 | 1.3822242  |
| H | -4.7781712 | -1.2397877 | -1.9359524 |
| H | -5.3489357 | -0.9963962 | 2.3486419  |
| C | -4.9809122 | 0.7602329  | -1.1176519 |
| C | -5.2866406 | 0.8977568  | 1.2902386  |
| H | -4.8626754 | 1.2511696  | -2.0878838 |
| H | -5.4413828 | 1.4947820  | 2.1936535  |
| C | -5.1589168 | 1.5323590  | 0.0429036  |
| H | -5.1962009 | 2.6230349  | -0.0235954 |
| C | -5.0095505 | -2.7106150 | 0.3044050  |
| C | -4.9666032 | -3.9321018 | 0.3798342  |
| H | -4.9269985 | -5.0021113 | 0.4452421  |
| H | -8.7340023 | 4.5939523  | 0.9731054  |
| C | -8.7128607 | 3.5229975  | 1.0416868  |
| C | -8.7136683 | 2.3014343  | 1.1160857  |
| C | -8.6931799 | 0.8721913  | 1.2056386  |
| C | -8.4993983 | 0.0828567  | 0.0449145  |
| H | -8.3632139 | 0.5779371  | -0.9197732 |
| C | -8.4544029 | -1.3133981 | 0.1409502  |

|   |            |            |            |
|---|------------|------------|------------|
| H | -8.2814547 | -1.9126278 | -0.7578007 |
| C | -8.6055755 | -1.9454665 | 1.3875712  |
| H | -8.5548243 | -3.0364074 | 1.4583423  |
| C | -8.8044195 | -1.1702654 | 2.5436972  |
| H | -8.9230769 | -1.6573346 | 3.5173886  |
| C | -8.8490668 | 0.2283929  | 2.4588653  |
| H | -8.9998518 | 0.8355864  | 3.3562443  |

---
